# Supplementary material for: Expression-Based Functional Investigation of the Organ-Specific MicroRNAs in Arabidopsis
Source: PLoS One. 2012 Nov 30;7(11):e50870. doi: 10.1371/journal.pone.0050870 (PMC3511311; doi:10.1371/journal.pone.0050870)
Supplement: Table S5 — List of AGO4-enriched microRNAs. (XLS) [file pone.0050870.s012.xls]

## Sheet: Sheet1
miRNA	Sequences	The miRNAs with normalized read counts larger than 10 RPM in either AGO4-related library were included.
ath-miR156a	UGACAGAAGAGAGUGAGCAC
ath-miR156b	UGACAGAAGAGAGUGAGCAC
ath-miR156c	UGACAGAAGAGAGUGAGCAC
ath-miR156d	UGACAGAAGAGAGUGAGCAC
ath-miR156e	UGACAGAAGAGAGUGAGCAC
ath-miR156f	UGACAGAAGAGAGUGAGCAC
ath-miR157a	UUGACAGAAGAUAGAGAGCAC
ath-miR157b	UUGACAGAAGAUAGAGAGCAC
ath-miR157c	UUGACAGAAGAUAGAGAGCAC
ath-miR158a	UCCCAAAUGUAGACAAAGCA
ath-miR159a	UUUGGAUUGAAGGGAGCUCUA
ath-miR159b	UUUGGAUUGAAGGGAGCUCUU
ath-miR160a	UGCCUGGCUCCCUGUAUGCCA
ath-miR160b	UGCCUGGCUCCCUGUAUGCCA
ath-miR160c	UGCCUGGCUCCCUGUAUGCCA
ath-miR161.1	UGAAAGUGACUACAUCGGGGU
ath-miR161.2	UCAAUGCAUUGAAAGUGACUA
ath-miR162a	UCGAUAAACCUCUGCAUCCAG
ath-miR162b	UCGAUAAACCUCUGCAUCCAG
ath-miR163	UUGAAGAGGACUUGGAACUUCGAU
ath-miR164a	UGGAGAAGCAGGGCACGUGCA
ath-miR164b	UGGAGAAGCAGGGCACGUGCA
ath-miR165a	UCGGACCAGGCUUCAUCCCCC
ath-miR165b	UCGGACCAGGCUUCAUCCCCC
ath-miR166a	UCGGACCAGGCUUCAUUCCCC
ath-miR166b	UCGGACCAGGCUUCAUUCCCC
ath-miR166c	UCGGACCAGGCUUCAUUCCCC
ath-miR166d	UCGGACCAGGCUUCAUUCCCC
ath-miR166e	UCGGACCAGGCUUCAUUCCCC
ath-miR166f	UCGGACCAGGCUUCAUUCCCC
ath-miR166g	UCGGACCAGGCUUCAUUCCCC
ath-miR167a	UGAAGCUGCCAGCAUGAUCUA
ath-miR167b	UGAAGCUGCCAGCAUGAUCUA
ath-miR168a	UCGCUUGGUGCAGGUCGGGAA
ath-miR168b	UCGCUUGGUGCAGGUCGGGAA
ath-miR171a	UGAUUGAGCCGCGCCAAUAUC
ath-miR172a	AGAAUCUUGAUGAUGCUGCAU
ath-miR172b	AGAAUCUUGAUGAUGCUGCAU
ath-miR172c	AGAAUCUUGAUGAUGCUGCAG
ath-miR172d	AGAAUCUUGAUGAUGCUGCAG
ath-miR173	UUCGCUUGCAGAGAGAAAUCAC
ath-miR319a	UUGGACUGAAGGGAGCUCCCU
ath-miR319b	UUGGACUGAAGGGAGCUCCCU
ath-miR390a	AAGCUCAGGAGGGAUAGCGCC
ath-miR390b	AAGCUCAGGAGGGAUAGCGCC
ath-miR393a	UCCAAAGGGAUCGCAUUGAUCC
ath-miR393b	UCCAAAGGGAUCGCAUUGAUCC
ath-miR394a	UUGGCAUUCUGUCCACCUCC
ath-miR394b	UUGGCAUUCUGUCCACCUCC
ath-miR396a	UUCCACAGCUUUCUUGAACUG
ath-miR396b	UUCCACAGCUUUCUUGAACUU
ath-miR400	UAUGAGAGUAUUAUAAGUCAC
ath-miR403	UUAGAUUCACGCACAAACUCG
ath-miR408	AUGCACUGCCUCUUCCCUGGC
ath-miR447a.2	UAUGGAAGAAAUUGUAGUAUU
ath-miR780.2	UUCUUCGUGAAUAUCUGGCAU
ath-miR822	UGCGGGAAGCAUUUGCACAUG
ath-miR824	UAGACCAUUUGUGAGAAGGGA
ath-miR829.1	AGCUCUGAUACCAAAUGAUGGAAU
ath-miR846	UUGAAUUGAAGUGCUUGAAUU
