# Supplementary material for: Expression-Based Functional Investigation of the Organ-Specific MicroRNAs in Arabidopsis
Source: PLoS One. 2012 Nov 30;7(11):e50870. doi: 10.1371/journal.pone.0050870 (PMC3511311; doi:10.1371/journal.pone.0050870)
Supplement: Table S6 — List of the microRNAs not enriched in AGO4. These microRNAs were treated as the control set. (XLS) [file pone.0050870.s013.xls]

## Sheet: Sheet1
miRNA	Sequences	The miRNAs not detected in any AGO4-related libraries were treated as the control set.
ath-miR156g	CGACAGAAGAGAGUGAGCAC
ath-miR169g*	UCCGGCAAGUUGACCUUGGCU
ath-miR1887	UACUAAGUAGAGUCUAAGAGA
ath-miR2112-5p	CGCAAAUGCGGAUAUCAAUGU
ath-miR2933a	GAAAUCGGAGAGGAAAUUCGCC
ath-miR2933b	GAAAUCGGAGAGGAAAUUCGCC
ath-miR2934-3p	CAUCCAAGGUGUUUGUAGAAA
ath-miR2936	CUUGAGAGAGAGAACACAGACG
ath-miR2937	AUAAGAGCUGUUGAAGGAGUC
ath-miR2938	GAUCUUUUGAGAGGGUUCCAG
ath-miR3434	ACUUGGCUGAUUCUAUUAUU
ath-miR3434*	UCAGAGUAUCAGCCAUGUGA
ath-miR3440b-3p	UGGAUUGGUCAAGGGAAGCGU
ath-miR3440b-5p	UUUUCUUGGCCCAUCCACUUC
ath-miR3932a	AACUUUGUGAUGACAACGAAG
ath-miR3932b	AACUUUGUGAUGACAACGAAG
ath-miR3933	AGAAGCAAAAUGACGACUCGG
ath-miR397b	UCAUUGAGUGCAUCGUUGAUG
ath-miR399e	UGCCAAAGGAGAUUUGCCUCG
ath-miR401	CGAAACUGGUGUCGACCGACA
ath-miR402	UUCGAGGCCUAUUAAACCUCUG
ath-miR404	AUUAACGCUGGCGGUUGCGGCAGC
ath-miR406	UAGAAUGCUAUUGUAAUCCAG
ath-miR407	UUUAAAUCAUAUACUUUUGGU
ath-miR413	AUAGUUUCUCUUGUUCUGCAC
ath-miR414	UCAUCUUCAUCAUCAUCGUCA
ath-miR415	AACAGAGCAGAAACAGAACAU
ath-miR416	GGUUCGUACGUACACUGUUCA
ath-miR417	GAAGGUAGUGAAUUUGUUCGA
ath-miR418	UAAUGUGAUGAUGAACUGACC
ath-miR419	UUAUGAAUGCUGAGGAUGUUG
ath-miR420	UAAACUAAUCACGGAAAUGCA
ath-miR4221	UUUUCCUCUGUUGAAUUCUUGC
ath-miR4227	UCACUGGUACCAAUCAUUCCA
ath-miR4228	AUAGCCUUGAACGCCGUCGUU
ath-miR4239	UUUGUUAUUUUCGCAUGCUCC
ath-miR4240	UGACUAGACCCGUAACAUUAC
ath-miR4243	UUGAAAUUGUAGAUUUCGUAC
ath-miR426	UUUUGGAAAUUUGUCCUUACG
ath-miR447c-3p	UUGGGGACGACAUCUUUUGUUG
ath-miR447c-5p	CCCCUUACAAUGUCGAGUAAA
ath-miR5013	UUUGUGACAUCUAGGUGCUUU
ath-miR5015a	UUGGUGUUAUGUGUAGUCUUC
ath-miR5015b	UCUGUUGUUGUUGGUGUUAUG
ath-miR5016	UUCUUGUGGAUUCCUUGGAAA
ath-miR5018	UUAAAGCUCCACCAUGAGUCCAAU
ath-miR5020b	AUGGCAUGAAAGAAGGUGAGA
ath-miR5021	UGAGAAGAAGAAGAAGAAAA
ath-miR5022	GUCAUGGGGUAUGAUCGAAUG
ath-miR5023	AUUGGUAGUGGAUAAGGGGGC
ath-miR5024	AUGACAAGGCCAAGAUAUAACA
ath-miR5025	ACUGUAUAUAUGUAAGUGACA
ath-miR5027	ACCGGUUGGAACUUGCCUUAA
ath-miR5029	AAUGAGAGAGAACACUGCAAA
ath-miR773b	UUUGAUUCCAGCUUUUGUCUC
ath-miR773b*	GGCAAUAACUUGAGCAAACA
ath-miR774	UUGGUUACCCAUAUGGCCAUC
ath-miR774b	UGAGAUGAAGAUAUGGGUGAU
ath-miR774b*	CAUCCAUAUUUUCAUCUCGAA
ath-miR776	UCUAAGUCUUCUAUUGAUGUU
ath-miR778	UGGCUUGGUUUAUGUACACCG
ath-miR779.1	UUCUGCUAUGUUGCUGCUCAU
ath-miR782	ACAAACACCUUGGAUGUUCUU
ath-miR826	UAGUCCGGUUUUGGAUACGUG
ath-miR831	UGAUCUCUUCGUACUCUUCUUG
ath-miR832-5p	UGCUGGGAUCGGGAAUCGAAA
ath-miR834	UGGUAGCAGUAGCGGUGGUAA
ath-miR835-3p	UGGAGAAGAUACGCAAGAAAG
ath-miR835-5p	UUCUUGCAUAUGUUCUUUAUC
ath-miR836	UCCUGUGUUUCCUUUGAUGCGUGG
ath-miR841b	UACGAGCCACUGGAAACUGAA
ath-miR841b*	CAAUUUCUAGUGGGUCGUAUU
ath-miR845b	UCGCUCUGAUACCAAAUUGAUG
ath-miR849	UAACUAAACAUUGGUGUAGUA
ath-miR851-3p	UGGGUGGCAAACAAAGACGAC
ath-miR854a	GAUGAGGAUAGGGAGGAGGAG
ath-miR854b	GAUGAGGAUAGGGAGGAGGAG
ath-miR854c	GAUGAGGAUAGGGAGGAGGAG
ath-miR854d	GAUGAGGAUAGGGAGGAGGAG
ath-miR854e	GAUGAGGAUAGGGAGGAGGAG
ath-miR855	AGCAAAAGCUAAGGAAAAGGAA
ath-miR861-3p	GAUGGAUAUGUCUUCAAGGAC
ath-miR861-5p	CCUUGGAGAAAUAUGCGUCAA
ath-miR862-3p	AUAUGCUGGAUCUACUUGAAG
ath-miR862-5p	UCCAAUAGGUCGAGCAUGUGC
ath-miR863-3p	UUGAGAGCAACAAGACAUAAU
ath-miR863-5p	UUAUGUCUUGUUGAUCUCAAU
ath-miR865-3p	UUUUUCCUCAAAUUUAUCCAA
ath-miR865-5p	AUGAAUUUGGAUCUAAUUGAG
ath-miR866-3p	ACAAAAUCCGUCUUUGAAGA
ath-miR868-3p	CUUCUUAAGUGCUGAUAAUGC
ath-miR869.1	AUUGGUUCAAUUCUGGUGUUG
ath-miR870	UAAUUUGGUGUUUCUUCGAUC
