# Supplementary material for: Expression-Based Functional Investigation of the Organ-Specific MicroRNAs in Arabidopsis
Source: PLoS One. 2012 Nov 30;7(11):e50870. doi: 10.1371/journal.pone.0050870 (PMC3511311; doi:10.1371/journal.pone.0050870)
Supplement: Table S7 — List of the identified potential poly(A) sites of certain organ-specific microRNAs. “Strand”: the strand information of the listed pre-miRNAs (precursor microRNAs). “Match site”: the location of the 5′ end of a “MPSS tag” within the downstream region of the pre-miRNA. The expression levels (in RPM; reads per million) of each “MPSS tag” in the 13 libraries (“INF”, “INS”, “AP1”, “AP3”, “AGM”, and “SAP” were prepared from floral organ; “S04”, “S52”, “LES”, and “LEF” were prepared from leaves; “ROS” and “ROF” were prepared from roots; “GSE” was prepared from seedlings) were provided. (XLS) [file pone.0050870.s014.xls]

## Sheet: 初筛结果
Pre-miRNA	Strand	Match site	MPSS tag	INF	INS	AP1	AP3	AGM	SAP	S04	S52	LES	LEF	ROS	ROF	GSE
ath-MIR169e	+	8090	GATCAGAAACTATAAGC	0	1	0	2	0	3	0	0	1	2	10	15	2
ath-MIR169e	+	8090	GATCAGAAACTATAAGCCGC	0	1	0	3	0	4	0	0	1	2	13	18	2
ath-MIR822	-	1856	GATCGAAGTTGCCCAAA	0	0	0	0	0	0	0	0	0	0	23	12	0
ath-MIR822	-	73	GATCCACGAATAATCCA	0	0	0	0	0	0	0	0	0	0	1	0	0
ath-MIR822	-	4975	GATCAGAAAAAATCCAC	0	0	0	0	0	0	0	0	0	0	1	0	0
ath-MIR822	-	218	GATCTTATCTTATTTTC	1	0	0	0	0	0	0	0	0	10	0	117	0
ath-MIR822	-	3959	GATCTGACCATGTAATG	0	2	3	0	0	0	0	0	0	0	0	0	0
ath-MIR822	-	2017	GATCATTTACACAACAC	0	0	0	0	0	0	0	0	0	0	0	1	0
ath-MIR822	-	5226	GATCACTTAGAGAATCG	0	0	0	0	0	0	0	0	1	0	0	0	0
ath-MIR822	-	6311	GATCAGGCTCCACCGCT	0	0	2	5	0	0	0	3	0	0	0	0	0
ath-MIR822	-	2163	GATCTTCTGATAGATTC	0	0	0	0	0	0	0	0	0	8	0	22	0
ath-MIR822	-	2069	GATCTCTTCTTCTTCTT	30	8	5	21	14	24	0	9	0	7	7	5	0
ath-MIR822	-	3338	GATCTATAAGCAGGCAA	0	2	0	0	0	0	0	0	0	0	0	0	0
ath-MIR822	-	9963	GATCTTCTTCTGGGCAA	0	1	0	3	0	0	0	0	0	0	0	0	0
ath-MIR822	-	4011	GATCTTTGTACTGTTTC	0	4	0	0	0	0	0	0	3	0	0	0	0
ath-MIR822	-	2017	GATCATTTACACAACACCCA	0	0	0	0	0	0	0	0	0	0	0	1	0
ath-MIR822	-	73	GATCCACGAATAATCCATCT	0	0	0	0	0	0	0	0	0	0	1	0	0
ath-MIR822	-	4975	GATCAGAAAAAATCCACCAA	0	0	0	0	0	0	0	0	0	0	1	0	0
ath-MIR822	-	4011	GATCTTTGTACTGTTTCGAT	0	4	0	0	0	0	0	0	4	0	0	0	0
ath-MIR822	-	218	GATCTTATCTTATTTTCTCA	1	0	0	0	0	0	0	0	0	12	0	134	0
ath-MIR822	-	5226	GATCACTTAGAGAATCGAAG	0	0	0	0	0	0	0	0	1	0	0	0	0
ath-MIR822	-	2163	GATCTTCTGATAGATTCAGA	0	0	0	0	0	0	0	0	0	9	0	26	0
ath-MIR822	-	2069	GATCTCTTCTTCTTCTTACC	0	0	0	7	0	0	0	0	0	0	8	4	0
ath-MIR822	-	1856	GATCGAAGTTGCCCAAACGA	0	0	0	0	0	0	0	0	0	0	24	12	0
ath-MIR822	-	9963	GATCTTCTTCTGGGCAAAGT	0	1	0	3	0	0	0	0	0	0	0	0	0
ath-MIR822	-	6311	GATCAGGCTCCACCGCTTTA	0	0	2	2	0	0	0	3	0	0	0	0	0
ath-MIR822	-	3959	GATCTGACCATGTAATGAAT	0	2	3	0	0	0	0	0	0	0	0	0	0
ath-MIR399c	+	2366	GATCTCTCTCTCTCTTT	0	0	0	1	0	0	0	0	2	0	17	44	0
ath-MIR399c	+	2258	GATCTTTTCCTGTGAAG	0	0	0	0	0	0	0	0	0	0	2	0	0
ath-MIR399c	+	2715	GATCGTACTTTTTTTGG	0	0	2	0	0	0	0	0	0	0	0	2	0
ath-MIR399c	+	2838	GATCCTTGTCTGAATCC	0	0	0	0	0	0	0	0	0	0	12	0	0
ath-MIR399c	+	5750	GATCAGCAGCAAGAGAA	63	2	11	13	20	2	1	0	18	0	40	170	0
ath-MIR399c	+	3804	GATCATGAAACCAGCAA	0	0	0	0	0	0	0	0	0	0	4	0	0
ath-MIR399c	+	3804	GATCATGAAACCAGCAATCA	0	0	0	0	0	0	0	0	0	0	5	0	0
ath-MIR399c	+	5750	GATCAGCAGCAAGAGAAATA	73	2	12	16	24	3	1	0	20	0	47	197	0
ath-MIR399c	+	2258	GATCTTTTCCTGTGAAGTTC	0	0	0	0	0	0	0	0	0	0	2	0	0
ath-MIR399c	+	2715	GATCGTACTTTTTTTGGGGG	0	0	3	0	0	0	0	0	0	0	0	2	0
ath-MIR399c	+	2838	GATCCTTGTCTGAATCCTAA	0	0	0	0	0	0	0	0	0	0	15	0	0
ath-MIR844	-	5675	GATCGAGACATACAATA	0	0	0	0	0	0	0	0	0	3	0	0	0
ath-MIR844	-	4002	GATCTGGGTTTATGAAC	0	1	0	2	0	5	0	0	0	0	0	0	2
ath-MIR844	-	217	GATCTATGCTGTTGGAA	0	0	0	0	1	0	0	0	0	3	0	0	0
ath-MIR844	-	3817	GATCTCTTATTCGGTTC	0	0	0	0	0	0	1	0	0	0	0	0	0
ath-MIR844	-	217	GATCTATGCTGTTGGAAAAC	0	0	0	0	1	0	0	0	0	3	0	0	0
ath-MIR844	-	3817	GATCTCTTATTCGGTTCCCG	0	0	0	0	0	0	1	0	0	0	0	0	0
ath-MIR844	-	4002	GATCTGGGTTTATGAACGGA	0	1	0	2	0	6	0	0	0	0	0	0	4
ath-MIR844	-	5675	GATCGAGACATACAATACCT	0	0	0	0	0	0	0	0	0	3	0	0	0
ath-MIR169f	-	4618	GATCAACGAGCAGCAAA	0	2	0	3	2	0	31	17	0	4	0	0	0
ath-MIR169f	-	7805	GATCTATTTTTCTATCT	7	0	0	0	0	0	0	0	0	0	0	23	0
ath-MIR169f	-	2391	GATCCTTCTGTCATAAT	37	5	0	0	0	0	0	0	5	0	0	0	0
ath-MIR169f	-	7733	GATCTGTGTTAGAGTAT	0	0	0	0	0	0	0	0	0	0	0	10	0
ath-MIR169f	-	2391	GATCCTTCTGTCATAATGCA	44	3	0	0	0	0	0	0	0	0	0	0	0
ath-MIR169f	-	7805	GATCTATTTTTCTATCTTCG	4	0	0	0	0	0	0	0	0	0	0	19	0
ath-MIR830	-	6753	GATCTCCCAAGAAGAAA	0	2	0	0	0	0	0	0	0	0	0	0	0
ath-MIR830	-	9596	GATCCCGTCAACTGTAC	0	1	0	0	4	0	0	0	0	0	0	0	0
ath-MIR830	-	2483	GATCCAAAAACAGAGAC	0	0	0	0	0	0	0	0	0	0	0	2	13
ath-MIR830	-	4090	GATCTGAAACCGGAGAA	0	1	0	0	0	0	0	0	37	0	2	0	2
ath-MIR830	-	866	GATCTGGTGACCATACC	0	0	0	0	0	0	0	0	0	0	1	0	0
ath-MIR830	-	2437	GATCTCACTCTCTCCTG	0	0	0	5	0	0	0	0	0	0	0	0	0
ath-MIR830	-	1736	GATCATACCGTTGATTG	0	0	3	3	1	0	0	0	0	5	0	3	0
ath-MIR830	-	1086	GATCCCTGTAATCATGG	0	0	1	0	0	0	0	0	0	0	0	0	0
ath-MIR830	-	1434	GATCATGACCAAGCTTC	0	0	0	0	0	0	0	0	0	0	1	0	0
ath-MIR830	-	2956	GATCTCGGAAGAGGAGG	0	0	2	0	0	0	0	1	0	0	0	0	0
ath-MIR830	-	3122	GATCATGTTTCTTCTCT	13	5	4	6	11	5	0	0	0	22	10	84	0
ath-MIR830	-	255	GATCTTCACAATGTCTT	0	0	0	0	0	0	0	0	0	0	2	0	0
ath-MIR830	-	2483	GATCCAAAAACAGAGACTTT	0	0	0	0	0	0	0	0	0	0	0	2	16
ath-MIR830	-	6753	GATCTCCCAAGAAGAAATCA	0	3	0	0	0	0	0	0	0	0	0	0	0
ath-MIR830	-	9596	GATCCCGTCAACTGTACACC	0	1	0	0	5	0	0	0	0	0	0	0	0
ath-MIR830	-	1086	GATCCCTGTAATCATGGAGA	0	0	1	0	0	0	0	0	0	0	0	0	0
ath-MIR830	-	3122	GATCATGTTTCTTCTCTAAT	15	0	0	4	10	6	0	0	0	26	11	95	0
ath-MIR830	-	1434	GATCATGACCAAGCTTCTCT	0	0	0	0	0	0	0	0	0	0	1	0	0
ath-MIR830	-	2437	GATCTCACTCTCTCCTGAGA	0	0	0	3	0	0	0	0	0	0	0	0	0
ath-MIR830	-	1736	GATCATACCGTTGATTGTAG	0	0	3	3	1	0	0	0	0	6	0	4	0
ath-MIR830	-	255	GATCTTCACAATGTCTTACA	0	0	0	0	0	0	0	0	0	0	3	0	0
ath-MIR830	-	2956	GATCTCGGAAGAGGAGGTAG	0	0	0	0	0	0	0	2	0	0	0	0	0
ath-MIR166c	+	6425	GATCCCGGAGGTGGAAA	0	6	0	0	0	0	0	0	0	0	0	1	0
ath-MIR166c	+	6287	GATCACATCAACCTCAC	0	0	0	0	0	0	0	0	0	1	0	0	0
ath-MIR166c	+	3144	GATCCATTCCCCAACTC	0	0	0	1	0	0	0	0	0	0	0	0	0
ath-MIR166c	+	9977	GATCAAGAACCAGACAA	0	0	0	4	0	0	0	0	0	0	0	0	2
ath-MIR166c	+	5005	GATCTGATTATCCTCTC	0	0	2	0	0	0	0	0	0	0	0	0	0
ath-MIR166c	+	6425	GATCCCGGAGGTGGAAATGG	0	6	0	0	0	0	0	0	0	0	0	2	0
ath-MIR166c	+	6287	GATCACATCAACCTCACAAC	0	0	0	0	0	0	0	0	0	1	0	0	0
ath-MIR166c	+	3144	GATCCATTCCCCAACTCTGT	0	0	0	2	0	0	0	0	0	0	0	0	0
ath-MIR166c	+	5005	GATCTGATTATCCTCTCTAA	0	0	3	0	0	0	0	0	0	0	0	0	0
ath-MIR166d	+	4464	GATCCCGGAGGTGGAAA	0	6	0	0	0	0	0	0	0	0	0	1	0
ath-MIR166d	+	4326	GATCACATCAACCTCAC	0	0	0	0	0	0	0	0	0	1	0	0	0
ath-MIR166d	+	1183	GATCCATTCCCCAACTC	0	0	0	1	0	0	0	0	0	0	0	0	0
ath-MIR166d	+	8016	GATCAAGAACCAGACAA	0	0	0	4	0	0	0	0	0	0	0	0	2
ath-MIR166d	+	9659	GATCCCCGTGTTTGTAA	0	0	0	1	0	0	0	0	0	0	0	0	0
ath-MIR166d	+	3044	GATCTGATTATCCTCTC	0	0	2	0	0	0	0	0	0	0	0	0	0
ath-MIR166d	+	9659	GATCCCCGTGTTTGTAAGCA	0	0	0	2	0	0	0	0	0	0	0	0	0
ath-MIR166d	+	4464	GATCCCGGAGGTGGAAATGG	0	6	0	0	0	0	0	0	0	0	0	2	0
ath-MIR166d	+	4326	GATCACATCAACCTCACAAC	0	0	0	0	0	0	0	0	0	1	0	0	0
ath-MIR166d	+	1183	GATCCATTCCCCAACTCTGT	0	0	0	2	0	0	0	0	0	0	0	0	0
ath-MIR166d	+	3044	GATCTGATTATCCTCTCTAA	0	0	3	0	0	0	0	0	0	0	0	0	0
ath-MIR160b	+	3696	GATCAATCAATCATAAA	74	7	0	17	0	87	0	0	26	33	4	165	0
ath-MIR160b	+	422	GATCTTCCAATCAAGGC	0	0	0	2	0	0	0	0	0	1	0	1	0
ath-MIR160b	+	7294	GATCGGGACGATGGAGC	0	0	0	0	0	0	0	0	0	0	0	0	1
ath-MIR160b	+	7086	GATCCCGGTGGTCTGCC	0	0	0	0	0	0	0	0	0	0	0	4	0
ath-MIR160b	+	3614	GATCAATACGATGATGA	0	3	0	1	0	0	0	0	0	0	0	0	0
ath-MIR160b	+	2565	GATCTTCAGATTCTTAG	0	2	0	0	0	0	0	0	0	0	0	0	0
ath-MIR160b	+	2387	GATCGGCGTTGTTCCGG	0	0	0	0	0	0	0	0	0	0	0	0	15
ath-MIR160b	+	422	GATCTTCCAATCAAGGCATC	0	0	0	3	0	0	0	0	0	1	0	1	0
ath-MIR160b	+	3696	GATCAATCAATCATAAAACT	61	4	0	17	0	92	0	0	29	27	2	180	0
ath-MIR160b	+	2387	GATCGGCGTTGTTCCGGCGG	0	0	0	0	0	0	0	0	0	0	0	0	23
ath-MIR160b	+	7086	GATCCCGGTGGTCTGCCACG	0	0	0	0	0	0	0	0	0	0	0	5	0
ath-MIR160b	+	3614	GATCAATACGATGATGATGA	0	3	0	1	0	0	0	0	0	0	0	0	0
ath-MIR160b	+	7294	GATCGGGACGATGGAGCTGG	0	0	0	0	0	0	0	0	0	0	0	0	1
ath-MIR398b	+	6427	GATCCCTTGGGTTGAAA	0	2	0	0	0	0	0	0	0	0	0	0	0
ath-MIR398b	+	4716	GATCCATAGCCCCCACA	0	0	2	0	0	0	0	0	0	0	0	0	0
ath-MIR398b	+	4938	GATCCACGCTCTGTAAT	0	0	0	0	0	0	0	0	0	0	0	0	2
ath-MIR398b	+	627	GATCAGGAGTAGCATCA	0	0	0	0	0	0	0	0	0	0	1	0	0
ath-MIR398b	+	3559	GATCTCGACAGGGTTGA	0	0	0	0	0	0	0	0	0	1	0	0	0
ath-MIR398b	+	725	GATCTTCGTGTGAGTTC	0	3	0	0	0	0	0	0	0	0	0	0	0
ath-MIR398b	+	181	GATCTACTTATTGTCAT	0	0	0	1	0	0	15	8	37	41	14	37	0
ath-MIR398b	+	4654	GATCCCCAGAGCGAGTT	0	0	0	0	0	0	0	0	0	0	0	0	2
ath-MIR398b	+	2600	GATCCACACAGAAAATC	0	0	2	0	0	0	0	0	0	0	0	0	0
ath-MIR398b	+	1627	GATCCTTTTCTCCAGTT	0	0	2	0	0	0	0	0	0	0	0	0	0
ath-MIR398b	+	4974	GATCTCGACGAAACTGG	0	0	2	0	0	0	0	0	0	0	0	0	1
ath-MIR398b	+	5453	GATCACAGAGTGGTCCC	0	0	1	7	0	0	52	0	35	0	3	0	0
ath-MIR398b	+	2165	GATCGCGTTGTAGCCTC	0	0	0	0	0	0	0	0	0	0	0	0	2
ath-MIR398b	+	8144	GATCAAGGTACGAAGTG	0	0	1	0	0	0	0	0	0	0	0	0	0
ath-MIR398b	+	2165	GATCGCGTTGTAGCCTCGTT	0	0	0	0	0	0	0	0	0	0	0	0	3
ath-MIR398b	+	4974	GATCTCGACGAAACTGGAAC	0	0	2	0	0	0	0	0	0	0	0	0	1
ath-MIR398b	+	181	GATCTACTTATTGTCATGCT	0	0	0	1	0	0	15	9	39	47	16	43	0
ath-MIR398b	+	627	GATCAGGAGTAGCATCAGAA	0	0	0	0	0	0	0	0	0	0	1	0	0
ath-MIR398b	+	1627	GATCCTTTTCTCCAGTTACG	0	0	2	0	0	0	0	0	0	0	0	0	0
ath-MIR398b	+	5453	GATCACAGAGTGGTCCCATA	0	0	0	8	0	0	53	0	37	0	3	0	0
ath-MIR398b	+	4654	GATCCCCAGAGCGAGTTGAC	0	0	0	0	0	0	0	0	0	0	0	0	4
ath-MIR398b	+	725	GATCTTCGTGTGAGTTCGCT	0	4	0	0	0	0	0	0	0	0	0	0	0
ath-MIR398b	+	2600	GATCCACACAGAAAATCGCG	0	0	1	0	0	0	0	0	0	0	0	0	0
ath-MIR398b	+	8144	GATCAAGGTACGAAGTGAGT	0	0	1	0	0	0	0	0	0	0	0	0	0
ath-MIR398c	+	2756	GATCCCTTGGGTTGAAA	0	2	0	0	0	0	0	0	0	0	0	0	0
ath-MIR398c	+	1045	GATCCATAGCCCCCACA	0	0	2	0	0	0	0	0	0	0	0	0	0
ath-MIR398c	+	1267	GATCCACGCTCTGTAAT	0	0	0	0	0	0	0	0	0	0	0	0	2
ath-MIR398c	+	983	GATCCCCAGAGCGAGTT	0	0	0	0	0	0	0	0	0	0	0	0	2
ath-MIR398c	+	9741	GATCGCTTTGAACATCA	0	0	0	0	0	5	0	0	0	0	1	0	2
ath-MIR398c	+	9124	GATCCTTGGTCATTTTC	0	0	2	1	0	0	0	0	0	0	5	2	0
ath-MIR398c	+	1303	GATCTCGACGAAACTGG	0	0	2	0	0	0	0	0	0	0	0	0	1
ath-MIR398c	+	1782	GATCACAGAGTGGTCCC	0	0	1	7	0	0	52	0	35	0	3	0	0
ath-MIR398c	+	4473	GATCAAGGTACGAAGTG	0	0	1	0	0	0	0	0	0	0	0	0	0
ath-MIR398c	+	1303	GATCTCGACGAAACTGGAAC	0	0	2	0	0	0	0	0	0	0	0	0	1
ath-MIR398c	+	9124	GATCCTTGGTCATTTTCCCT	0	0	1	1	0	0	0	0	0	0	6	2	0
ath-MIR398c	+	1782	GATCACAGAGTGGTCCCATA	0	0	0	8	0	0	53	0	37	0	3	0	0
ath-MIR398c	+	983	GATCCCCAGAGCGAGTTGAC	0	0	0	0	0	0	0	0	0	0	0	0	4
ath-MIR398c	+	9741	GATCGCTTTGAACATCACCG	0	0	0	0	0	5	0	0	0	0	0	0	2
ath-MIR398c	+	4473	GATCAAGGTACGAAGTGAGT	0	0	1	0	0	0	0	0	0	0	0	0	0
ath-MIR399a	+	3199	GATCTCAAGATTACCAA	0	0	3	0	0	0	0	0	0	4	0	10	0
ath-MIR399a	+	6670	GATCTCTCGGTTCCATA	0	0	0	0	0	1	0	0	0	0	0	0	0
ath-MIR399a	+	1739	GATCATTTGTCTTTTCC	0	0	0	0	0	0	0	0	0	2	0	0	0
ath-MIR399a	+	2248	GATCTTCTCTTATAATA	0	0	0	0	0	0	0	0	0	0	0	2	0
ath-MIR399a	+	992	GATCTAAAAGTTCACGG	0	0	0	0	0	7	0	0	0	0	0	0	0
ath-MIR399a	+	9290	GATCAACAAAATATCCG	0	0	0	0	0	0	0	0	0	0	1	0	0
ath-MIR399a	+	9841	GATCCAACGATGATTCT	0	0	0	0	0	0	0	0	0	0	15	0	4
ath-MIR399a	+	3415	GATCATATTTTTTTGGA	0	0	0	0	0	0	0	0	0	4	0	0	0
ath-MIR399a	+	3199	GATCTCAAGATTACCAAAAA	0	0	4	0	0	0	0	0	0	5	0	13	0
ath-MIR399a	+	2248	GATCTTCTCTTATAATATAC	0	0	0	0	0	0	0	0	0	0	0	2	0
ath-MIR399a	+	3415	GATCATATTTTTTTGGAACT	0	0	0	0	0	0	0	0	0	3	0	0	0
ath-MIR399a	+	6670	GATCTCTCGGTTCCATAGTA	0	0	0	0	0	1	0	0	0	0	0	0	0
ath-MIR399a	+	9290	GATCAACAAAATATCCGAAT	0	0	0	0	0	0	0	0	0	0	1	0	0
ath-MIR399a	+	9841	GATCCAACGATGATTCTCAT	0	0	0	0	0	0	0	0	0	0	19	0	6
ath-MIR399a	+	992	GATCTAAAAGTTCACGGATA	0	0	0	0	0	8	0	0	0	0	0	0	0
ath-MIR399a	+	1739	GATCATTTGTCTTTTCCTTT	0	0	0	0	0	0	0	0	0	2	0	0	0
ath-MIR862	+	462	GATCGGTTCAATGCCAA	0	0	1	0	0	0	0	0	0	0	0	0	2
ath-MIR862	+	8291	GATCAAACTTGTTCTTG	0	3	0	0	0	0	0	0	0	0	0	0	0
ath-MIR862	+	7412	GATCCTCTTCAAGTAAA	0	0	0	3	0	0	0	0	0	0	0	0	0
ath-MIR862	+	1703	GATCTCGTGGAGGCAGA	0	1	0	17	5	0	0	0	0	0	0	0	0
ath-MIR862	+	6887	GATCTGGTGTCCTGGGA	0	0	0	0	0	0	0	0	0	0	0	0	27
ath-MIR862	+	5452	GATCTGAATGTGGTGGA	64	182	133	113	122	111	20	7	44	51	30	39	8
ath-MIR862	+	4470	GATCCAAGAGCTTATCT	0	0	0	1	0	0	0	0	0	0	0	0	0
ath-MIR862	+	966	GATCTTCAAGCAATGGC	0	0	2	4	0	2	0	0	0	1	0	7	0
ath-MIR862	+	3351	GATCTTTCAGAGTACTG	0	0	0	3	0	0	0	0	0	0	0	2	0
ath-MIR862	+	3086	GATCTTGCTGGTTTGGA	0	0	2	1	0	0	0	0	0	0	0	0	0
ath-MIR862	+	4201	GATCATCCAGGGAAACC	0	2	0	1	0	3	0	0	0	0	9	0	0
ath-MIR862	+	6887	GATCTGGTGTCCTGGGAAGC	0	0	0	0	0	0	0	0	0	0	0	0	42
ath-MIR862	+	3086	GATCTTGCTGGTTTGGAAGA	0	0	3	1	0	0	0	0	0	0	0	0	0
ath-MIR862	+	3351	GATCTTTCAGAGTACTGGGT	0	0	0	3	0	0	0	0	0	0	0	2	0
ath-MIR862	+	462	GATCGGTTCAATGCCAAAAA	0	0	1	0	0	0	0	0	0	0	0	0	2
ath-MIR862	+	966	GATCTTCAAGCAATGGCTAG	0	0	1	4	0	2	0	0	0	1	0	8	0
ath-MIR862	+	4201	GATCATCCAGGGAAACCTGT	0	0	0	1	0	4	0	0	0	0	11	0	0
ath-MIR862	+	5452	GATCTGAATGTGGTGGAGGG	73	205	146	134	144	134	22	8	48	61	37	48	10
ath-MIR862	+	8291	GATCAAACTTGTTCTTGTTC	0	4	0	0	0	0	0	0	0	0	0	0	0
ath-MIR862	+	4470	GATCCAAGAGCTTATCTGCA	0	0	0	1	0	0	0	0	0	0	0	0	0
ath-MIR862	+	1703	GATCTCGTGGAGGCAGAGGA	0	3	1	14	4	0	0	0	0	0	0	0	1
ath-MIR5026	+	1071	GATCCGGACTACAACAA	0	0	0	0	0	0	0	0	0	4	0	0	0
ath-MIR5026	+	2724	GATCACCTTTCAATCAT	0	0	0	0	0	0	18	3	5	9	0	0	0
ath-MIR5026	+	1584	GATCATGGAGGAGGCAC	0	0	0	0	0	0	0	0	7	0	0	0	0
ath-MIR5026	+	3090	GATCACCGTTTGTTCAT	0	0	0	0	0	0	0	0	0	1	0	3	0
ath-MIR5026	+	741	GATCATCTGGTGGATAT	0	0	0	0	0	0	5	0	0	0	0	0	0
ath-MIR5026	+	896	GATCCTTTACCTCTTGT	0	0	0	0	0	0	0	0	0	1	0	0	0
ath-MIR5026	+	2383	GATCAGGTGTATTCAAT	0	0	0	0	0	0	0	0	12	8	0	0	0
ath-MIR5026	+	1968	GATCTCAATAGCATTGA	53	0	0	4	0	0	44	18	45	594	0	4	0
ath-MIR5026	+	1616	GATCCACGAGAGAACCA	0	0	2	0	0	2	2	0	0	0	0	0	0
ath-MIR5026	+	1616	GATCCACGAGAGAACCAACC	0	0	3	0	0	1	1	0	0	0	0	0	0
ath-MIR5026	+	2383	GATCAGGTGTATTCAATCTT	0	0	0	0	0	0	0	0	13	8	0	0	0
ath-MIR5026	+	741	GATCATCTGGTGGATATCAA	0	0	0	0	0	0	2	0	0	0	0	0	0
ath-MIR5026	+	3090	GATCACCGTTTGTTCATAAG	0	0	0	0	0	0	0	0	0	1	0	4	0
ath-MIR5026	+	896	GATCCTTTACCTCTTGTGTG	0	0	0	0	0	0	0	0	0	1	0	0	0
ath-MIR5026	+	2724	GATCACCTTTCAATCATCTA	0	0	0	0	0	0	13	4	5	3	0	0	0
ath-MIR5026	+	1584	GATCATGGAGGAGGCACCAA	0	0	0	0	0	0	0	0	5	0	0	0	0
ath-MIR5026	+	1071	GATCCGGACTACAACAAAGC	0	0	0	0	0	0	0	0	1	0	0	0	0
ath-MIR5026	+	1968	GATCTCAATAGCATTGATAC	56	0	0	4	0	0	45	21	45	660	0	5	0
ath-MIR405d	-	9369	GATCAAAGACTTGAGAT	8	0	1	0	0	0	0	0	0	0	0	0	0
ath-MIR405d	-	9369	GATCAAAGACTTGAGATGCC	6	0	1	0	0	0	0	0	0	0	0	0	0
ath-MIR172a	-	6514	GATCTTGTCTTGGATAA	0	0	0	1	0	0	0	0	0	13	0	0	0
ath-MIR172a	-	1545	GATCTGACAAAATGAGA	0	0	0	0	0	0	0	0	6	0	5	0	0
ath-MIR172a	-	3507	GATCTCAGAACTCACTT	0	0	0	0	0	0	0	0	0	0	0	0	2
ath-MIR172a	-	4098	GATCTCGATAGTTACAA	0	0	1	0	4	0	0	0	0	0	0	0	0
ath-MIR172a	-	6514	GATCTTGTCTTGGATAAGTA	0	0	0	1	0	0	0	0	0	15	0	0	0
ath-MIR172a	-	1545	GATCTGACAAAATGAGATGG	0	0	0	0	0	0	0	0	7	0	6	0	0
ath-MIR172a	-	4098	GATCTCGATAGTTACAAGGT	0	0	1	0	5	0	0	0	0	0	0	0	0
ath-MIR172a	-	3507	GATCTCAGAACTCACTTGTC	0	0	0	0	0	0	0	0	0	0	0	0	1
ath-MIR856	+	15	GATCCATCTGTACACAA	3	0	0	0	0	0	0	0	0	0	0	0	0
ath-MIR856	+	9862	GATCTTGTCATGACCCA	16	59	97	96	34	50	0	10	5	32	50	33	17
ath-MIR856	+	2760	GATCATCAAGTGAGGAC	0	0	0	0	0	0	0	0	0	0	5	0	0
ath-MIR856	+	9862	GATCTTGTCATGACCCAAGC	12	63	107	100	13	12	0	9	2	30	27	20	13
ath-MIR856	+	15	GATCCATCTGTACACAATTG	4	0	0	0	0	0	0	0	0	0	0	0	0
ath-MIR165b	-	6682	GATCGCCGAGAAAGGAA	0	0	0	5	0	0	0	0	0	0	0	0	0
ath-MIR165b	-	6639	GATCTGGAGTTGTTCTA	0	0	0	0	1	0	0	0	0	0	0	0	0
ath-MIR165b	-	6960	GATCATTCGAAAAGCGG	0	3	0	2	0	2	0	0	0	0	0	0	0
ath-MIR165b	-	7552	GATCGGAAGATAGGCTT	77	43	23	60	59	18	0	0	1	0	0	0	0
ath-MIR165b	-	3089	GATCATCACCATCATCA	0	0	0	0	1	0	0	0	12	0	10	5	0
ath-MIR165b	-	3345	GATCATAAAAATAGAAA	47	0	0	0	0	0	0	0	0	12	0	208	0
ath-MIR165b	-	7379	GATCGTCGGAGAAGAAG	0	0	0	4	0	0	0	0	0	0	0	0	0
ath-MIR165b	-	6375	GATCAATCGGACCGGTC	0	0	2	2	0	0	0	0	0	0	0	0	0
ath-MIR165b	-	7738	GATCTCGTTGATACGTA	0	9	0	6	2	40	0	0	0	0	0	0	0
ath-MIR165b	-	7241	GATCAAGAAAATGAAGA	0	2	0	0	0	0	0	0	0	0	0	0	0
ath-MIR165b	-	3004	GATCCCTTGTCACGTTG	0	1	1	0	0	0	0	0	0	0	0	0	0
ath-MIR165b	-	7552	GATCGGAAGATAGGCTTAGG	0	44	24	65	53	15	0	0	1	0	0	0	0
ath-MIR165b	-	7241	GATCAAGAAAATGAAGATGA	0	1	0	0	0	0	0	0	0	0	0	0	0
ath-MIR165b	-	6960	GATCATTCGAAAAGCGGAAA	0	4	0	3	0	3	0	0	0	0	0	0	0
ath-MIR165b	-	3345	GATCATAAAAATAGAAAATC	25	0	0	0	0	0	0	0	0	11	0	154	0
ath-MIR165b	-	6639	GATCTGGAGTTGTTCTATGC	0	0	0	0	2	0	0	0	0	0	0	0	0
ath-MIR165b	-	3004	GATCCCTTGTCACGTTGAGG	0	1	1	0	0	0	0	0	0	0	0	0	0
ath-MIR165b	-	7738	GATCTCGTTGATACGTAGTT	0	2	0	1	0	39	0	0	0	0	0	0	0
ath-MIR165b	-	3089	GATCATCACCATCATCATCA	0	0	0	0	2	0	0	0	13	0	8	6	0
ath-MIR165b	-	6682	GATCGCCGAGAAAGGAAGTA	0	0	0	6	0	0	0	0	0	0	0	0	0
ath-MIR165b	-	7379	GATCGTCGGAGAAGAAGCCA	0	0	0	1	0	0	0	0	0	0	0	0	0
ath-MIR165b	-	6375	GATCAATCGGACCGGTCTTA	0	0	2	3	0	0	0	0	0	0	0	0	0
ath-MIR415	+	4462	GATCGGAGAGTGACGAA	0	2	5	1	4	1	3	0	32	0	0	0	56
ath-MIR415	+	380	GATCCGGTGCTAACAAC	0	0	3	2	0	0	19	2	7	38	66	117	2
ath-MIR415	+	4642	GATCATCCGGAGAATTG	0	0	0	0	0	0	0	0	39	0	0	0	25
ath-MIR415	+	5264	GATCTACTTTGCTGCTA	0	5	9	12	0	8	31	0	7	0	0	0	11
ath-MIR415	+	5524	GATCAAATCCGGCTAGA	587	1765	2576	2243	2493	1345	3291	1751	2957	1385	34	11	1246
ath-MIR415	+	1023	GATCAGTTATTGTCGGA	0	0	0	0	0	7	0	0	0	0	1	0	0
ath-MIR415	+	316	GATCCTGAGAGAAGAAA	0	0	0	0	0	0	0	0	0	0	2	0	2
ath-MIR415	+	5147	GATCATCCGTGTGGAGG	0	2	12	16	0	2	0	0	26	0	0	0	58
ath-MIR415	+	4462	GATCGGAGAGTGACGAAGAT	0	2	5	1	5	1	4	0	36	0	0	0	67
ath-MIR415	+	1023	GATCAGTTATTGTCGGAAGA	0	0	0	0	0	8	0	0	0	0	1	0	0
ath-MIR415	+	5524	GATCAAATCCGGCTAGAGAA	468	667	1788	1996	973	1307	3428	1822	3199	1144	20	11	1521
ath-MIR415	+	5264	GATCTACTTTGCTGCTAAGA	0	5	6	12	0	10	36	0	8	0	0	0	6
ath-MIR415	+	380	GATCCGGTGCTAACAACCGC	0	0	3	3	0	0	21	2	7	43	75	129	0
ath-MIR415	+	1863	GATCATTGTATTTCCAAGAG	0	0	0	0	0	0	0	0	0	0	0	1	0
ath-MIR415	+	5147	GATCATCCGTGTGGAGGCTC	0	3	15	9	0	2	0	0	28	0	0	0	79
ath-MIR415	+	316	GATCCTGAGAGAAGAAAAGG	0	0	0	0	0	0	0	0	0	0	3	0	3
ath-MIR162b	-	7702	GATCCGGTAATACCGAA	0	2	0	0	0	0	0	29	0	0	0	0	0
ath-MIR162b	-	7363	GATCACCTCTTGGTCCT	0	2	1	0	1	0	0	0	0	0	0	0	0
ath-MIR162b	-	499	GATCGGTTTTTTTCCTG	0	0	0	3	0	0	0	0	0	0	0	0	0
ath-MIR162b	-	3960	GATCATATATGGAAAAG	15	0	0	0	0	0	0	0	0	45	0	0	0
ath-MIR162b	-	1544	GATCAGCATGCTCAAAT	0	0	2	0	0	0	0	0	0	1	0	1	0
ath-MIR162b	-	8700	GATCGAACGAGTCTGTA	0	130	31	46	68	61	16	15	54	1	40	0	0
ath-MIR162b	-	9239	GATCCTTGTCCCTCAAT	8	5	14	0	5	0	0	0	0	1	30	22	0
ath-MIR162b	-	3903	GATCTTTTGATAAGATA	0	0	0	0	0	0	2	0	0	278	0	0	2
ath-MIR162b	-	3174	GATCTTACGCCGGCTCA	0	3	0	0	0	0	0	0	0	0	0	0	0
ath-MIR162b	-	226	GATCAATTATCATATGT	1	0	0	0	0	0	0	0	0	0	0	0	0
ath-MIR162b	-	6180	GATCATATACCTTGCTA	0	0	0	0	0	0	0	0	1	0	0	0	0
ath-MIR162b	-	3238	GATCAGAGAAAGACAAG	0	4	0	0	0	0	0	0	11	0	0	0	35
ath-MIR162b	-	3238	GATCAGAGAAAGACAAGGAG	0	4	0	0	0	0	0	0	11	0	0	0	54
ath-MIR162b	-	3903	GATCTTTTGATAAGATAAGA	0	0	0	0	0	0	0	0	0	235	0	0	2
ath-MIR162b	-	9239	GATCCTTGTCCCTCAATTTG	0	1	14	0	0	0	0	0	0	1	27	24	0
ath-MIR162b	-	226	GATCAATTATCATATGTGTT	1	0	0	0	0	0	0	0	0	0	0	0	0
ath-MIR162b	-	1544	GATCAGCATGCTCAAATCTG	0	0	2	0	0	0	0	0	0	1	0	0	0
ath-MIR162b	-	7702	GATCCGGTAATACCGAAAGT	0	2	0	0	0	0	0	31	0	0	0	0	0
ath-MIR162b	-	6180	GATCATATACCTTGCTATTG	0	0	0	0	0	0	0	0	1	0	0	0	0
ath-MIR162b	-	8700	GATCGAACGAGTCTGTAATT	0	36	0	0	75	65	14	0	42	0	32	0	0
ath-MIR162b	-	7363	GATCACCTCTTGGTCCTACC	0	2	1	0	1	0	0	0	0	0	0	0	0
ath-MIR162b	-	499	GATCGGTTTTTTTCCTGGCT	0	0	0	3	0	0	0	0	0	0	0	0	0
ath-MIR172d	+	2868	GATCAGAAGTCTAAGAA	0	0	0	0	0	0	0	0	0	0	0	0	2
ath-MIR172d	+	264	GATCTTTTTTTTTTTAA	50	0	0	0	0	0	0	0	0	56	0	26	0
ath-MIR172d	+	6946	GATCTGAAGAAGCAGAG	0	12	40	51	33	52	58	13	29	32	80	31	20
ath-MIR172d	+	4632	GATCTCTTTTTTTTTTT	12	0	0	7	0	0	0	0	0	0	0	7	0
ath-MIR172d	+	8524	GATCAAGAAGAGCCAGC	0	0	0	0	0	0	0	0	0	0	0	0	6
ath-MIR172d	+	7377	GATCGATACATCCTGCA	0	1	0	5	0	0	0	0	0	0	0	0	0
ath-MIR172d	+	8304	GATCCAACACCTTGTAC	0	0	9	0	0	0	0	0	0	0	0	0	0
ath-MIR172d	+	3401	GATCACGAGTTATGACT	2	0	0	0	0	0	0	0	0	0	0	0	0
ath-MIR172d	+	5749	GATCTCTTTCCGGTTAT	0	0	0	0	0	0	0	0	0	0	0	0	3
ath-MIR172d	+	2868	GATCAGAAGTCTAAGAATCT	0	0	0	0	0	0	0	0	0	0	0	0	2
ath-MIR172d	+	6946	GATCTGAAGAAGCAGAGAGA	0	14	40	31	32	54	62	10	23	34	89	34	22
ath-MIR172d	+	5749	GATCTCTTTCCGGTTATCAC	0	0	0	0	0	0	0	0	0	0	0	0	5
ath-MIR172d	+	3401	GATCACGAGTTATGACTTAA	2	0	0	0	0	0	0	0	0	0	0	0	0
ath-MIR172d	+	8304	GATCCAACACCTTGTACTTG	0	0	8	0	0	0	0	0	0	0	0	0	0
ath-MIR172d	+	7377	GATCGATACATCCTGCATGA	0	1	0	4	0	0	0	0	0	0	0	0	0
ath-MIR5028	-	5636	GATCTGAATAAGGTCAA	0	0	1	0	0	0	0	0	0	0	0	0	0
ath-MIR5028	-	7974	GATCCTTTGTTGTGATG	125	17	2	17	17	5	12	8	22	48	15	86	0
ath-MIR5028	-	6367	GATCAGGGAAAGCAAAA	0	0	0	1	0	0	0	0	0	0	0	0	0
ath-MIR5028	-	7863	GATCTCTGTGGAATTTG	0	0	0	0	0	4	0	0	0	0	0	0	0
ath-MIR5028	-	7286	GATCTAGACTTGAGCAA	0	0	0	0	0	0	0	0	0	4	0	0	0
ath-MIR5028	-	7974	GATCCTTTGTTGTGATGTTC	144	17	2	21	22	6	14	9	25	54	16	101	0
ath-MIR5028	-	5636	GATCTGAATAAGGTCAAACG	0	0	1	0	0	0	0	0	0	0	0	0	0
ath-MIR5028	-	7863	GATCTCTGTGGAATTTGAGG	0	0	0	0	0	3	0	0	0	0	0	0	0
ath-MIR5028	-	6367	GATCAGGGAAAGCAAAACTC	0	0	0	1	0	0	0	0	0	0	0	0	0
ath-MIR5028	-	7286	GATCTAGACTTGAGCAAGTA	0	0	0	0	0	0	0	0	0	4	0	0	0
ath-MIR169h	-	2307	GATCTACGGAGAAGGTA	0	0	1	0	0	0	0	0	0	0	0	0	0
ath-MIR169h	-	2409	GATCATAACAATTATCG	0	0	2	0	0	0	0	0	0	0	0	0	0
ath-MIR169h	-	8566	GATCATGAGGGCCCAAG	0	0	0	0	0	0	0	0	0	0	0	0	4
ath-MIR169h	-	1336	GATCGAATGGCGAAGAT	0	0	2	0	0	0	0	0	0	0	0	0	0
ath-MIR169h	-	4089	GATCCAGACAAGGACGT	0	6	0	0	0	0	0	0	0	0	0	0	0
ath-MIR169h	-	1413	GATCCTGTGACTTTGTT	0	0	2	0	0	0	0	0	0	0	0	0	3
ath-MIR169h	-	4431	GATCGCGTGGCAGATAG	33	56	103	69	20	118	16	137	76	26	216	13	61
ath-MIR169h	-	1948	GATCCGCGTTCTTGAGC	0	0	0	0	0	3	0	0	0	0	2	0	0
ath-MIR169h	-	3259	GATCGCCATCCTCATCG	0	0	5	0	0	0	0	0	0	0	0	0	0
ath-MIR169h	-	5964	GATCCAGCCATGTCACC	0	0	2	0	3	0	0	0	0	1	2	0	0
ath-MIR169h	-	3089	GATCCACCACATTACCA	0	0	0	0	0	0	0	0	0	0	0	0	2
ath-MIR169h	-	5833	GATCACCAACTCGAGAA	0	0	0	1	0	0	0	0	1	0	0	0	0
ath-MIR169h	-	5315	GATCCTCTCCCCTTCCC	0	6	2	4	0	0	0	0	12	3	0	0	6
ath-MIR169h	-	4933	GATCTTGTTATTACATC	5	0	0	0	0	0	0	0	0	0	2	27	0
ath-MIR169h	-	2472	GATCATTTGTTTGGTAA	22	4	0	16	13	5	14	14	2	34	67	52	3
ath-MIR169h	-	962	GATCTCAGTTGATGATG	0	0	4	0	0	0	0	0	0	0	0	0	0
ath-MIR169h	-	2220	GATCCTTTTACCCCGAC	0	0	0	0	0	0	0	0	0	0	0	0	5
ath-MIR169h	-	3812	GATCAAGGCTGGTCCTT	0	0	1	0	1	0	0	0	0	0	4	0	0
ath-MIR169h	-	1948	GATCCGCGTTCTTGAGCCAT	0	0	0	0	0	4	0	0	0	0	2	0	0
ath-MIR169h	-	962	GATCTCAGTTGATGATGACA	0	0	4	0	0	0	0	0	0	0	0	0	0
ath-MIR169h	-	1780	GATCCAAGAAGAAGTTTCAA	0	3	0	0	0	0	0	0	0	0	0	0	0
ath-MIR169h	-	4933	GATCTTGTTATTACATCCCA	0	0	0	0	0	0	0	0	0	0	2	29	0
ath-MIR169h	-	2409	GATCATAACAATTATCGCGG	0	0	2	0	0	0	0	0	0	0	0	0	0
ath-MIR169h	-	3259	GATCGCCATCCTCATCGGTA	0	0	5	0	0	0	0	0	0	0	0	0	0
ath-MIR169h	-	2472	GATCATTTGTTTGGTAACAA	23	5	0	19	15	4	16	15	2	38	75	59	0
ath-MIR169h	-	4089	GATCCAGACAAGGACGTGGA	0	7	0	0	0	0	0	0	0	0	0	0	0
ath-MIR169h	-	8566	GATCATGAGGGCCCAAGCCA	0	0	0	0	0	0	0	0	0	0	0	0	4
ath-MIR169h	-	2307	GATCTACGGAGAAGGTACGC	0	0	1	0	0	0	0	0	0	0	0	0	0
ath-MIR169h	-	1336	GATCGAATGGCGAAGATTGG	0	0	2	0	0	0	0	0	0	0	0	0	0
ath-MIR169h	-	5833	GATCACCAACTCGAGAAGGA	0	0	0	2	0	0	0	0	1	0	0	0	0
ath-MIR169h	-	5964	GATCCAGCCATGTCACCAGG	0	0	2	0	3	0	0	0	0	2	2	0	0
ath-MIR169h	-	4431	GATCGCGTGGCAGATAGACT	34	63	113	79	23	133	16	151	82	30	237	14	70
ath-MIR169h	-	3812	GATCAAGGCTGGTCCTTTTG	0	0	1	0	2	0	0	0	0	0	5	0	0
ath-MIR169h	-	1413	GATCCTGTGACTTTGTTGGA	0	0	2	0	0	0	0	0	0	0	0	0	5
ath-MIR169h	-	5315	GATCCTCTCCCCTTCCCATG	0	7	2	3	0	0	0	0	12	2	0	0	6
ath-MIR399b	-	8210	GATCAAATTATATTGAA	4	0	0	0	0	0	0	0	0	0	0	0	0
ath-MIR399b	-	1563	GATCAGAGACTCTTTGA	0	0	1	2	0	0	0	0	2	0	2	3	0
ath-MIR399b	-	2885	GATCGGAAAGTTTTCGC	0	0	0	0	0	0	0	0	0	0	0	0	9
ath-MIR399b	-	2541	GATCAGAACAAGTCCTT	0	0	0	0	1	5	0	0	0	0	5	2	1
ath-MIR399b	-	2928	GATCTGAAGGAGATGGT	0	0	1	0	0	0	0	0	0	0	0	0	0
ath-MIR399b	-	2443	GATCCGGTGAAATTAGG	0	0	0	0	0	0	0	0	0	0	0	0	2
ath-MIR399b	-	1728	GATCTCGTTGTGGCTCA	0	3	14	2	2	0	0	0	0	0	13	0	9
ath-MIR399b	-	4917	GATCACACCTCGTTATT	0	1	0	0	0	0	0	0	0	0	0	0	0
ath-MIR399b	-	1904	GATCCGATGAAATCGGC	0	0	0	0	0	0	0	0	9	0	0	1	6
ath-MIR399b	-	2796	GATCCATCCGGTTTTAC	0	0	3	0	0	0	0	0	2	1	0	2	6
ath-MIR399b	-	2723	GATCTTGAAGACGACCG	0	0	0	4	0	0	0	0	0	0	0	0	15
ath-MIR399b	-	1770	GATCCCGGTTAAGTTCC	0	2	0	0	0	0	0	0	0	0	2	0	0
ath-MIR399b	-	8210	GATCAAATTATATTGAAAGT	4	0	0	0	0	0	0	0	0	0	0	0	0
ath-MIR399b	-	1728	GATCTCGTTGTGGCTCACAA	0	0	1	0	0	0	0	0	0	0	13	0	0
ath-MIR399b	-	1563	GATCAGAGACTCTTTGATAG	0	0	1	3	0	0	0	0	2	0	2	4	0
ath-MIR399b	-	4917	GATCACACCTCGTTATTATC	0	1	0	0	0	0	0	0	0	0	0	0	0
ath-MIR399b	-	2541	GATCAGAACAAGTCCTTTCT	0	0	0	0	1	0	0	0	0	0	5	2	0
ath-MIR399b	-	2796	GATCCATCCGGTTTTACCGT	0	0	4	0	0	0	0	0	2	1	0	2	6
ath-MIR399b	-	2885	GATCGGAAAGTTTTCGCCGG	0	0	0	0	0	0	0	0	0	0	0	3	11
ath-MIR399b	-	1904	GATCCGATGAAATCGGCATT	0	0	0	0	0	0	0	0	10	0	0	2	5
ath-MIR399b	-	2723	GATCTTGAAGACGACCGGAG	0	0	0	0	0	0	0	0	0	0	0	0	15
ath-MIR399b	-	2928	GATCTGAAGGAGATGGTATA	0	0	1	0	0	0	0	0	0	0	0	0	0
ath-MIR399b	-	1770	GATCCCGGTTAAGTTCCTCT	0	2	0	0	0	0	0	0	0	0	2	1	0
ath-MIR832	+	7750	GATCAATTTGATGAGAA	0	0	0	0	0	3	0	0	0	0	0	0	0
ath-MIR832	+	7939	GATCTTTTGGTATTTTC	0	4	0	0	0	1	0	0	0	0	0	0	0
ath-MIR832	+	8718	GATCAAAACACTCTCCA	44	57	82	53	35	61	68	24	23	32	145	40	84
ath-MIR832	+	2855	GATCATCAGCGTCTTCA	0	0	0	3	0	0	0	0	0	0	0	0	0
ath-MIR832	+	7903	GATCTCCTTAGGCTATT	0	0	0	1	0	0	0	0	0	0	0	0	0
ath-MIR832	+	7939	GATCTTTTGGTATTTTCCTA	0	2	0	3	0	0	0	0	0	0	0	0	0
ath-MIR832	+	8718	GATCAAAACACTCTCCAAGG	46	63	92	60	40	66	75	27	26	36	163	45	105
ath-MIR832	+	7750	GATCAATTTGATGAGAATGT	0	0	0	0	0	2	0	0	0	0	0	0	0
ath-MIR832	+	7903	GATCTCCTTAGGCTATTTTC	0	0	0	2	0	0	0	0	0	0	0	0	0
ath-MIR783	+	7651	GATCCAAAAAAAAATAA	0	0	0	0	0	0	0	0	0	0	0	4	0
ath-MIR783	+	8543	GATCGCTCTCGAAGCAG	0	0	2	2	0	3	0	0	0	0	0	0	0
ath-MIR783	+	9303	GATCCGTGGTACCAGTT	0	0	3	0	0	0	0	0	2	0	0	0	0
ath-MIR783	+	8432	GATCTCATCAAGGTCAC	0	5	0	0	2	0	0	0	0	0	0	0	0
ath-MIR783	+	9240	GATCAGATGAAACTTCC	0	0	0	4	0	0	0	0	0	0	0	0	0
ath-MIR783	+	8543	GATCGCTCTCGAAGCAGCTG	0	0	2	2	0	4	0	0	0	0	0	0	0
ath-MIR783	+	9240	GATCAGATGAAACTTCCCCA	0	0	0	4	0	0	0	0	0	0	0	0	0
ath-MIR783	+	9303	GATCCGTGGTACCAGTTTCA	0	0	4	0	0	0	0	0	2	0	0	0	0
ath-MIR783	+	8432	GATCTCATCAAGGTCACTGT	0	4	0	0	2	0	0	0	0	0	0	0	1
ath-MIR2938	-	7863	GATCTGATGATAACTAA	2	3	0	0	3	0	3	0	0	5	0	5	0
ath-MIR2938	-	1633	GATCTTGCAAGCCGTGG	0	0	0	0	0	0	0	0	0	0	0	0	4
ath-MIR2938	-	5067	GATCGTGGTTTGAGACC	0	20	22	7	38	41	62	83	41	78	0	0	308
ath-MIR2938	-	9720	GATCGAGGACCAACCGG	0	0	0	0	12	0	0	0	0	0	0	1	3
ath-MIR2938	-	213	GATCAAAGTTTGTTCCT	0	0	0	4	1	0	0	44	8	19	14	2	0
ath-MIR2938	-	2217	GATCAGTTGGAGTCGAA	0	0	0	0	0	0	0	0	0	0	0	0	7
ath-MIR2938	-	4196	GATCTCAGCAACTTCCA	0	37	43	29	32	21	39	45	16	0	0	0	87
ath-MIR2938	-	7523	GATCCAGTTCAATTACA	0	0	0	0	0	3	0	0	0	0	0	0	0
ath-MIR2938	-	4309	GATCAATCATCCCAATA	0	21	23	27	17	15	22	12	29	10	0	0	184
ath-MIR2938	-	4952	GATCATATCCGTCATGT	0	11	0	8	0	2	0	0	22	0	0	0	2
ath-MIR2938	-	4911	GATCCAGCACCAACGAC	0	10	13	5	4	57	27	10	79	1	0	0	201
ath-MIR2938	-	2944	GATCTTAAACGACATAA	14	9	5	6	0	15	0	3	1	0	23	18	0
ath-MIR2938	-	4883	GATCTCATAAGCAGCAG	0	1	6	11	0	3	3	0	28	0	0	0	15
ath-MIR2938	-	6317	GATCTTGATGTTATCCT	4	0	2	4	0	7	0	3	0	11	0	21	0
ath-MIR2938	-	3891	GATCAAGGGAAACTTTT	0	20	14	22	19	32	44	5	56	13	0	0	123
ath-MIR2938	-	5006	GATCGGGTCGAACGTGA	0	6	33	55	2	52	89	19	39	3	0	0	275
ath-MIR2938	-	7523	GATCCAGTTCAATTACATTC	0	0	0	0	0	2	0	0	0	0	0	0	0
ath-MIR2938	-	4309	GATCAATCATCCCAATACTC	0	23	25	30	16	10	22	5	31	12	0	0	273
ath-MIR2938	-	5067	GATCGTGGTTTGAGACCGAT	0	21	24	8	33	46	67	88	44	87	0	0	364
ath-MIR2938	-	4883	GATCTCATAAGCAGCAGATA	0	1	7	12	0	4	4	0	27	0	0	0	7
ath-MIR2938	-	3891	GATCAAGGGAAACTTTTCTT	0	22	16	17	21	38	41	6	58	14	0	0	157
ath-MIR2938	-	9720	GATCGAGGACCAACCGGAGC	0	0	0	0	13	0	0	0	0	0	0	1	4
ath-MIR2938	-	7863	GATCTGATGATAACTAAGTA	2	4	0	0	3	0	3	0	0	5	0	5	0
ath-MIR2938	-	4196	GATCTCAGCAACTTCCATAC	0	43	49	36	33	12	41	50	17	0	0	0	133
ath-MIR2938	-	5006	GATCGGGTCGAACGTGAAAG	0	6	38	64	2	62	100	21	43	3	0	0	342
ath-MIR2938	-	4952	GATCATATCCGTCATGTACC	0	4	0	6	0	2	0	0	20	0	0	0	0
ath-MIR2938	-	6317	GATCTTGATGTTATCCTTCT	4	0	3	4	0	5	0	0	0	11	0	24	0
ath-MIR2938	-	2944	GATCTTAAACGACATAACCG	6	11	4	8	0	0	0	0	0	0	24	14	0
ath-MIR2938	-	4911	GATCCAGCACCAACGACGAC	0	12	14	4	2	62	27	9	83	1	0	0	257
ath-MIR2938	-	1633	GATCTTGCAAGCCGTGGACC	0	0	0	0	0	0	0	0	0	0	0	0	4
ath-MIR408	+	8257	GATCTTAACCCAGTTAA	0	15	6	0	0	11	0	0	0	0	0	0	0
ath-MIR408	+	4963	GATCACGGCACGGTCTC	0	2	0	0	0	28	0	0	0	0	0	0	0
ath-MIR408	+	2017	GATCAGGAGACAACTGA	0	0	0	4	0	0	0	0	0	0	0	0	0
ath-MIR408	+	5877	GATCCTCAAGAGCGTAC	0	0	6	0	0	3	0	0	0	0	0	0	0
ath-MIR408	+	6283	GATCCCTCCGGATTTAT	0	0	0	0	0	5	0	0	0	0	0	0	0
ath-MIR408	+	6028	GATCAGCTTGTTTGGGT	3	13	9	0	0	11	0	0	0	0	0	0	0
ath-MIR408	+	9318	GATCGGCCACGGGAGAA	0	27	7	0	0	0	0	0	0	0	0	0	0
ath-MIR408	+	187	GATCCGTTACTCGCCCT	0	0	0	0	0	0	0	0	0	0	17	0	0
ath-MIR408	+	9190	GATCCTAGCACCACCGT	0	2	1	0	0	0	0	0	0	0	0	0	0
ath-MIR408	+	9052	GATCACTTGCTCTCTGT	0	0	2	0	0	4	0	0	0	0	0	0	0
ath-MIR408	+	2173	GATCGTGTGAATGCGTA	0	0	0	2	0	0	0	0	0	0	0	0	0
ath-MIR408	+	4840	GATCACGGTTGCGGATT	1	3	9	0	0	0	0	0	0	0	0	0	0
ath-MIR408	+	351	GATCGACTGCTCTGTAT	3	0	2	0	0	0	0	0	22	3	7	30	0
ath-MIR408	+	234	GATCGGTCTCCGCTGCC	0	0	0	0	0	0	27	0	7	0	0	2	0
ath-MIR408	+	8809	GATCCATTTTGCCATGA	0	0	3	0	0	0	0	0	0	0	0	0	0
ath-MIR408	+	9636	GATCTTCACCCATTTCC	0	0	0	0	0	1	0	0	0	0	0	0	0
ath-MIR408	+	8809	GATCCATTTTGCCATGAATC	0	0	4	0	0	0	0	0	0	0	0	0	0
ath-MIR408	+	4840	GATCACGGTTGCGGATTTGC	1	4	10	0	0	0	0	0	0	0	0	0	0
ath-MIR408	+	9318	GATCGGCCACGGGAGAATCA	0	4	0	0	0	0	0	0	0	0	0	0	0
ath-MIR408	+	2017	GATCAGGAGACAACTGAGGT	0	0	0	5	0	0	0	0	0	0	0	0	0
ath-MIR408	+	2173	GATCGTGTGAATGCGTACCT	0	0	0	3	0	0	0	0	0	0	0	0	0
ath-MIR408	+	4963	GATCACGGCACGGTCTCCGT	0	2	0	0	0	33	0	0	0	0	0	0	0
ath-MIR408	+	9820	GATCAGCTTGTTTGGGTCAT	3	9	4	0	0	0	0	0	0	0	0	0	0
ath-MIR408	+	6028	GATCAGCTTGTTTGGGTCCT	0	2	0	0	0	0	0	0	0	0	0	0	0
ath-MIR408	+	8257	GATCTTAACCCAGTTAACTC	0	16	4	0	0	0	0	0	0	0	0	0	0
ath-MIR408	+	351	GATCGACTGCTCTGTATTCT	4	0	3	0	0	0	0	0	23	3	8	34	0
ath-MIR408	+	9052	GATCACTTGCTCTCTGTAGA	0	0	1	0	0	0	0	0	0	0	0	0	0
ath-MIR408	+	187	GATCCGTTACTCGCCCTTGT	0	0	0	0	0	0	0	0	0	0	16	0	0
ath-MIR408	+	9190	GATCCTAGCACCACCGTCAT	0	0	1	0	0	0	0	0	0	0	0	0	0
ath-MIR408	+	234	GATCGGTCTCCGCTGCCAAT	0	0	0	0	0	0	29	0	8	0	0	3	0
ath-MIR835	-	4643	GATCCAAGACGATGTAA	0	0	0	0	0	0	0	3	0	0	0	0	0
ath-MIR835	-	1669	GATCTGAAGGCGGTGGA	0	0	0	2	0	4	0	0	0	0	0	0	0
ath-MIR835	-	2	GATCAGACTTTTTATTT	2	0	0	0	6	0	0	0	0	0	0	6	0
ath-MIR835	-	8782	GATCCATTTTCTTCAAA	0	0	0	2	10	0	0	0	0	4	0	1	0
ath-MIR835	-	8356	GATCAGTGTACATATAA	0	0	0	5	0	0	0	0	0	0	0	0	0
ath-MIR835	-	965	GATCCGGAGGTTATCAC	0	0	0	0	0	0	0	0	0	0	0	0	6
ath-MIR835	-	6583	GATCTCATGTGTTTGTG	0	0	0	0	0	0	0	0	1	0	0	0	0
ath-MIR835	-	4023	GATCTGAATCTGTAGTT	0	0	0	3	0	0	0	9	0	0	0	0	0
ath-MIR835	-	9868	GATCCATCTCCTAAGCG	0	0	1	2	1	0	0	0	1	0	0	0	0
ath-MIR835	-	1195	GATCATTTAGAAACGTG	6	0	2	0	0	0	0	0	4	8	5	8	0
ath-MIR835	-	9133	GATCAACAGTCTTTTCC	0	0	0	0	0	0	0	0	0	0	7	0	2
ath-MIR835	-	6052	GATCTGTCTGAAGATAT	0	0	0	0	0	0	0	0	7	0	0	0	0
ath-MIR835	-	6724	GATCGGTCTTCGACTCT	0	0	0	0	0	0	0	0	0	0	0	3	0
ath-MIR835	-	8152	GATCCGGAGTTGGATGA	0	1	5	3	1	0	0	0	1	0	0	3	9
ath-MIR835	-	2048	GATCAAATACATGACTT	0	0	0	0	0	0	0	0	0	5	0	0	0
ath-MIR835	-	1195	GATCATTTAGAAACGTGCTT	5	0	2	0	0	0	0	0	0	10	6	3	0
ath-MIR835	-	8782	GATCCATTTTCTTCAAAATC	0	0	0	1	12	0	0	0	0	4	0	2	0
ath-MIR835	-	4643	GATCCAAGACGATGTAACCC	0	0	0	0	0	0	0	3	0	0	0	0	0
ath-MIR835	-	8356	GATCAGTGTACATATAACCT	0	0	0	7	0	0	0	0	0	0	0	0	0
ath-MIR835	-	1669	GATCTGAAGGCGGTGGACAT	0	0	0	2	0	2	0	0	0	0	0	0	0
ath-MIR835	-	6724	GATCGGTCTTCGACTCTTCG	0	0	0	0	0	0	0	0	0	0	0	4	0
ath-MIR835	-	6052	GATCTGTCTGAAGATATTAG	0	0	0	0	0	0	0	0	8	0	0	0	0
ath-MIR835	-	4023	GATCTGAATCTGTAGTTCCT	0	0	0	3	0	0	0	11	0	0	0	0	0
ath-MIR835	-	8152	GATCCGGAGTTGGATGAGTG	0	1	6	3	1	0	0	0	0	0	0	2	13
ath-MIR835	-	965	GATCCGGAGGTTATCACAAG	0	0	0	0	0	0	0	0	0	0	0	0	8
ath-MIR835	-	6583	GATCTCATGTGTTTGTGATT	0	0	0	0	0	0	0	0	1	0	0	0	0
ath-MIR835	-	9133	GATCAACAGTCTTTTCCAAA	0	0	0	0	0	0	0	0	0	0	9	0	0
ath-MIR835	-	2048	GATCAAATACATGACTTGAG	0	0	0	0	0	0	0	0	0	6	0	0	0
ath-MIR835	-	2	GATCAGACTTTTTATTTGAA	2	0	0	0	2	0	0	0	0	0	0	5	0
ath-MIR835	-	9868	GATCCATCTCCTAAGCGAAT	0	0	1	2	1	0	0	0	1	0	0	0	0
ath-MIR159a	-	8641	GATCAAAGGATTCGCCA	0	3	0	0	0	0	0	0	0	0	0	0	0
ath-MIR159a	-	7963	GATCATGGAGTTCCTTA	0	0	1	0	0	5	0	0	3	0	0	0	0
ath-MIR159a	-	8200	GATCGGGAAAAAAGCAG	0	0	0	0	2	0	0	0	0	0	0	0	3
ath-MIR159a	-	6204	GATCAACGGTCAGGGTT	0	0	0	0	0	0	0	0	10	0	0	0	0
ath-MIR159a	-	8999	GATCCGCTCCATAGGCC	132	32	42	4	7	28	20	3	17	30	17	0	0
ath-MIR159a	-	5952	GATCTCTCTATCTCTCT	0	4	7	12	0	0	0	0	0	21	8	57	0
ath-MIR159a	-	8917	GATCAATGGATGCGATG	0	0	0	0	0	0	0	0	5	0	0	0	0
ath-MIR159a	-	8524	GATCAGCAAATGGGAAG	0	0	0	0	0	0	0	0	0	0	0	0	15
ath-MIR159a	-	7499	GATCTCCGGTGACATAA	0	3	0	0	0	9	0	0	0	0	0	0	0
ath-MIR159a	-	7031	GATCACTTAGAAGACAC	0	0	1	0	0	0	0	0	0	0	0	0	0
ath-MIR159a	-	8962	GATCCTAACCCAAAGAA	0	0	6	0	0	2	0	0	0	0	0	0	0
ath-MIR159a	-	9875	GATCTACCCGGTTACAA	0	2	0	0	3	0	0	9	0	0	0	0	0
ath-MIR159a	-	227	GATCCTTGGTTCTTTGG	0	0	0	0	2	5	0	11	0	0	0	4	11
ath-MIR159a	-	7031	GATCACTTAGAAGACACCCA	0	0	1	0	0	0	0	0	0	0	0	0	0
ath-MIR159a	-	8999	GATCCGCTCCATAGGCCATC	151	37	47	5	7	33	20	3	18	33	19	0	0
ath-MIR159a	-	9875	GATCTACCCGGTTACAAAAG	0	2	0	0	3	0	0	9	0	0	0	0	0
ath-MIR159a	-	7499	GATCTCCGGTGACATAAGAA	0	4	0	0	0	9	0	0	0	0	0	0	0
ath-MIR159a	-	8641	GATCAAAGGATTCGCCATTA	0	1	0	0	0	0	0	0	0	0	0	0	0
ath-MIR159a	-	8200	GATCGGGAAAAAAGCAGGAG	0	0	0	0	0	0	0	0	0	0	0	0	5
ath-MIR159a	-	8524	GATCAGCAAATGGGAAGAGT	0	0	0	0	0	0	0	0	0	0	0	0	18
ath-MIR159a	-	227	GATCCTTGGTTCTTTGGAGA	0	0	0	0	0	0	0	10	0	0	0	5	9
ath-MIR159a	-	7963	GATCATGGAGTTCCTTATTC	0	0	1	0	0	6	0	0	2	0	0	0	0
ath-MIR159a	-	8917	GATCAATGGATGCGATGTTC	0	0	0	0	0	0	0	0	5	0	0	0	0
ath-MIR159a	-	8962	GATCCTAACCCAAAGAATTG	0	0	4	0	0	1	0	0	0	0	0	0	0
ath-MIR159a	-	6204	GATCAACGGTCAGGGTTACG	0	0	0	0	0	0	0	0	12	0	0	0	0
ath-MIR403	+	7770	GATCGTTATGCAAACCA	0	2	0	0	0	0	0	0	0	0	0	0	0
ath-MIR403	+	9204	GATCATTCTACCCAAAG	0	0	0	0	0	37	0	0	0	0	0	0	0
ath-MIR403	+	431	GATCCACTGGTAAAGAG	0	0	0	0	0	0	0	0	0	0	0	1	0
ath-MIR403	+	6814	GATCTTCTGCTTTTAGA	0	0	0	0	0	0	0	0	0	0	0	2	0
ath-MIR403	+	5602	GATCAAAGTCTTCTGGA	0	0	0	0	1	0	0	0	0	0	0	0	0
ath-MIR403	+	7770	GATCGTTATGCAAACCACAA	0	2	0	0	0	0	0	0	0	0	0	0	0
ath-MIR403	+	6814	GATCTTCTGCTTTTAGACTC	0	0	0	0	0	0	0	0	0	0	0	2	0
ath-MIR403	+	431	GATCCACTGGTAAAGAGAAT	0	0	0	0	0	0	0	0	0	0	0	1	0
ath-MIR403	+	9204	GATCATTCTACCCAAAGATA	0	0	0	0	0	30	0	0	0	0	0	0	0
ath-MIR418	+	8127	GATCTCCGGTATCTCCA	0	2	0	0	0	0	0	0	0	0	0	0	0
ath-MIR418	+	2109	GATCTAGAATCGAGCAG	0	0	0	0	0	18	0	0	0	0	0	0	0
ath-MIR418	+	8927	GATCAATGGAGGACTAA	0	2	0	0	0	0	0	0	0	0	0	0	0
ath-MIR418	+	9415	GATCTAGCATACATGGA	9	0	0	0	0	0	0	0	0	0	0	0	0
ath-MIR418	+	8487	GATCGGAGCCATTCATC	0	0	0	1	0	0	0	0	0	1	0	0	0
ath-MIR418	+	8445	GATCCGAGAATCGCCGT	0	0	0	3	0	0	0	0	4	0	0	0	0
ath-MIR418	+	6939	GATCCCCTCAATTGACC	0	0	0	0	0	0	0	0	0	0	0	0	1
ath-MIR418	+	8956	GATCCGAAGAACGGGAG	0	10	1	0	22	0	0	11	0	1	14	0	2
ath-MIR418	+	3610	GATCCTCATTCTAAGAA	0	0	0	0	3	0	0	0	0	0	0	0	0
ath-MIR418	+	6286	GATCAAAGTTCCAAGAC	0	0	0	4	3	5	0	0	12	6	17	0	0
ath-MIR418	+	3164	GATCAAACCTAGGAATT	0	0	3	0	0	0	0	0	4	0	0	0	0
ath-MIR418	+	8214	GATCTCTTCAGCTCCCG	2	0	0	0	0	0	0	0	0	0	0	0	0
ath-MIR418	+	1693	GATCTTCTTGAGTGTAC	0	0	0	0	0	8	0	0	0	0	0	3	0
ath-MIR418	+	7048	GATCTCCTAAACCTTGT	0	0	0	0	0	6	0	0	0	0	0	0	0
ath-MIR418	+	7882	GATCTCCGCATCTTAAC	0	2	0	0	0	0	0	0	0	0	0	0	0
ath-MIR418	+	7139	GATCTTCTCAATCTCAG	0	0	12	0	0	0	0	0	0	0	0	0	0
ath-MIR418	+	8127	GATCTCCGGTATCTCCATGG	0	2	0	0	0	0	0	0	0	0	0	0	0
ath-MIR418	+	3610	GATCCTCATTCTAAGAATTC	0	0	0	0	4	0	0	0	0	0	0	0	0
ath-MIR418	+	8927	GATCAATGGAGGACTAAACT	0	2	0	0	0	0	0	0	0	0	0	0	0
ath-MIR418	+	6286	GATCAAAGTTCCAAGACTGA	0	0	0	4	3	6	0	0	13	7	19	0	0
ath-MIR418	+	6939	GATCCCCTCAATTGACCAGA	0	0	0	0	0	0	0	0	0	0	0	0	1
ath-MIR418	+	7882	GATCTCCGCATCTTAACCGG	0	3	0	0	0	0	0	0	0	0	0	0	0
ath-MIR418	+	8445	GATCCGAGAATCGCCGTACG	0	0	0	1	0	0	1	0	5	0	0	0	0
ath-MIR418	+	8956	GATCCGAAGAACGGGAGAGA	0	11	1	0	20	0	0	11	0	2	17	0	0
ath-MIR418	+	1693	GATCTTCTTGAGTGTACCAA	0	0	0	0	0	8	0	0	0	0	0	0	0
ath-MIR418	+	8487	GATCGGAGCCATTCATCGAT	0	0	0	1	0	0	0	0	0	2	0	0	0
ath-MIR418	+	7139	GATCTTCTCAATCTCAGTTG	0	0	9	0	0	0	0	0	0	0	0	0	0
ath-MIR418	+	7048	GATCTCCTAAACCTTGTTCT	0	0	0	0	0	7	0	0	0	0	0	0	0
ath-MIR167b	+	666	GATCAGAAGCAGAAGCA	0	0	0	0	0	0	0	0	0	0	9	0	0
ath-MIR167b	+	9517	GATCATGTCCTAGAAGA	0	0	0	0	0	0	0	0	0	0	0	0	2
ath-MIR167b	+	9538	GATCAGATGGGTTGGTC	0	0	5	10	0	0	0	0	0	0	0	0	19
ath-MIR167b	+	6542	GATCATCTTTCCATCGG	2	8	16	15	2	0	0	0	6	25	34	19	0
ath-MIR167b	+	9576	GATCCACATGTAGATAG	0	1	0	1	13	0	0	0	0	0	0	0	68
ath-MIR167b	+	8280	GATCTTGGAAATGGAAG	0	2	0	0	0	0	0	0	0	0	0	0	0
ath-MIR167b	+	6224	GATCCCGTTCAACGGAT	0	4	3	1	0	0	0	0	0	0	0	0	0
ath-MIR167b	+	5870	GATCCGCCAAGTAGAGT	0	0	0	0	0	0	0	0	2	0	0	0	0
ath-MIR167b	+	9315	GATCAAATTGAGACTGA	55	21	7	8	15	12	25	11	28	24	38	56	0
ath-MIR167b	+	9056	GATCCCCCATCAGAGGA	30	3	18	8	11	0	2	4	0	3	17	6	2
ath-MIR167b	+	8026	GATCAACACGCCAACTT	0	0	2	0	0	0	0	3	0	0	0	0	0
ath-MIR167b	+	5220	GATCCCTCCACCTGCTT	0	0	0	3	0	0	0	0	0	0	0	0	15
ath-MIR167b	+	947	GATCGGCCATGAAAGGG	0	0	0	1	2	0	0	0	1	0	2	0	0
ath-MIR167b	+	164	GATCTATCATAGGTGCA	4	0	0	0	0	0	0	0	0	2	0	0	0
ath-MIR167b	+	9315	GATCAAATTGAGACTGATAT	0	9	0	0	12	7	24	6	28	0	25	0	0
ath-MIR167b	+	947	GATCGGCCATGAAAGGGATG	0	0	0	1	2	0	0	0	1	0	2	0	0
ath-MIR167b	+	6224	GATCCCGTTCAACGGATTGT	0	4	3	2	0	0	0	0	0	0	0	0	0
ath-MIR167b	+	164	GATCTATCATAGGTGCATCA	2	0	0	0	0	0	0	0	0	1	0	0	0
ath-MIR167b	+	5220	GATCCCTCCACCTGCTTTCC	0	0	1	1	0	0	0	0	0	0	0	0	16
ath-MIR167b	+	9576	GATCCACATGTAGATAGGGA	0	1	0	1	15	0	0	0	0	0	0	0	85
ath-MIR167b	+	6542	GATCATCTTTCCATCGGGTT	2	10	19	18	2	0	0	0	7	29	38	23	0
ath-MIR167b	+	9538	GATCAGATGGGTTGGTCTTT	0	0	3	10	0	0	0	0	0	0	0	0	25
ath-MIR167b	+	9517	GATCATGTCCTAGAAGAGAA	0	0	0	0	0	0	0	0	0	0	0	0	1
ath-MIR167b	+	5870	GATCCGCCAAGTAGAGTAAG	0	0	0	0	0	0	0	0	2	0	0	0	0
ath-MIR167b	+	9056	GATCCCCCATCAGAGGAGGA	33	4	21	10	14	0	2	5	0	3	17	7	4
ath-MIR167b	+	8280	GATCTTGGAAATGGAAGCAG	0	3	0	0	0	0	0	0	0	0	0	0	0
ath-MIR167b	+	8026	GATCAACACGCCAACTTGGA	0	0	0	0	0	0	0	3	0	0	0	0	0
ath-MIR2936	-	7489	GATCCTCCAACACAGCA	0	0	0	0	0	0	0	0	0	0	0	0	8
ath-MIR2936	-	6722	GATCAACACTTCGTTCA	0	1	1	0	0	0	0	0	0	0	0	0	0
ath-MIR2936	-	8000	GATCTCAACCAACCAAT	0	0	4	0	0	0	0	0	0	0	0	0	0
ath-MIR2936	-	298	GATCCCAAAACCGGTTA	0	1	0	0	0	1	0	10	10	1	6	0	56
ath-MIR2936	-	9352	GATCAAGCTTAATCAAC	0	0	0	0	0	0	0	0	0	0	0	0	2
ath-MIR2936	-	8383	GATCGTCTACGGCGTGG	0	0	5	0	0	0	0	0	0	0	0	0	0
ath-MIR2936	-	6452	GATCATCTGTCTTATCT	0	0	0	0	0	0	0	0	0	0	0	0	2
ath-MIR2936	-	3778	GATCTTTTCGAAAGGTA	1	0	0	3	0	0	0	5	0	0	0	0	0
ath-MIR2936	-	7316	GATCTGTTTACGGCAAT	0	0	0	0	1	0	0	0	0	0	0	0	0
ath-MIR2936	-	6686	GATCTGTTGTGCGGTGG	0	0	0	0	0	0	0	0	0	0	0	0	2
ath-MIR2936	-	6224	GATCCATCATCAGCTCA	0	0	0	0	5	0	0	0	1	0	0	0	0
ath-MIR2936	-	3963	GATCCCAACGGAAAACT	0	0	4	0	2	0	0	0	0	0	0	0	8
ath-MIR2936	-	9601	GATCACCCACTATGAAT	0	0	0	0	0	0	0	0	0	0	0	0	1
ath-MIR2936	-	543	GATCGTTGGATGTATGA	69	56	12	7	9	37	195	1624	412	993	532	1033	61
ath-MIR2936	-	8052	GATCGAATCGCCGGAAT	0	0	2	0	0	0	0	0	0	0	0	0	0
ath-MIR2936	-	448	GATCTGGTGCAGTGAAC	16	33	7	16	24	36	160	2031	246	676	313	409	107
ath-MIR2936	-	23	GATCGTATCTGCTTTCG	0	0	0	0	0	0	0	1	27	0	11	0	14
ath-MIR2936	-	7489	GATCCTCCAACACAGCACAC	0	0	0	0	0	0	0	0	0	0	0	0	11
ath-MIR2936	-	6722	GATCAACACTTCGTTCATGT	0	1	0	0	0	0	0	0	0	0	0	0	0
ath-MIR2936	-	8000	GATCTCAACCAACCAATCTC	0	0	2	0	0	0	0	0	0	0	0	0	0
ath-MIR2936	-	3778	GATCTTTTCGAAAGGTAAGA	0	0	0	3	0	0	0	7	0	0	0	0	0
ath-MIR2936	-	543	GATCGTTGGATGTATGATAG	70	60	12	9	0	41	209	1791	445	988	570	1119	91
ath-MIR2936	-	8383	GATCGTCTACGGCGTGGATA	0	0	1	0	0	1	0	0	0	0	0	0	0
ath-MIR2936	-	7316	GATCTGTTTACGGCAATCAG	0	0	0	0	2	0	0	0	0	0	0	0	0
ath-MIR2936	-	8052	GATCGAATCGCCGGAATCCT	0	0	3	0	0	0	0	0	0	0	0	0	0
ath-MIR2936	-	9601	GATCACCCACTATGAATTTC	0	0	0	0	0	0	0	0	0	0	0	0	1
ath-MIR2936	-	3963	GATCCCAACGGAAAACTCCA	0	0	5	0	2	0	0	0	0	0	0	0	0
ath-MIR2936	-	6452	GATCATCTGTCTTATCTCGA	0	0	0	0	0	0	0	0	0	0	0	0	4
ath-MIR2936	-	298	GATCCCAAAACCGGTTATTA	0	1	0	0	0	1	0	10	10	1	5	0	66
ath-MIR2936	-	6224	GATCCATCATCAGCTCACAT	0	0	0	0	3	0	0	0	1	0	0	0	0
ath-MIR2936	-	448	GATCTGGTGCAGTGAACCCT	19	38	8	18	21	42	171	2208	233	770	359	478	98
ath-MIR2936	-	23	GATCGTATCTGCTTTCGTCT	0	0	0	0	0	0	0	1	30	0	14	0	23
ath-MIR168a	+	4205	GATCAACGATGTTGGTA	0	0	0	0	0	0	0	0	0	1	0	0	0
ath-MIR168a	+	3333	GATCCGATTTGGAAAAC	0	13	11	21	12	0	13	27	5	18	23	28	12
ath-MIR168a	+	2011	GATCCCCACTACCCAAA	0	0	1	0	0	0	0	0	0	0	0	0	0
ath-MIR168a	+	2181	GATCCTTCACAAAACAT	0	0	0	3	0	0	0	0	0	0	0	0	0
ath-MIR168a	+	5087	GATCCGTCACAATATCG	0	0	0	0	0	0	1	0	0	0	2	0	0
ath-MIR168a	+	4861	GATCATCAACCACCGCA	0	0	0	0	0	2	0	0	11	0	0	0	1
ath-MIR168a	+	25	GATCTGGAAGATTTCTA	0	0	0	1	1	0	0	20	0	0	0	0	0
ath-MIR168a	+	9286	GATCAGCTGCTCGCGGA	0	0	0	2	0	0	0	0	0	0	0	0	0
ath-MIR168a	+	3895	GATCAAGCTTACAATTC	0	0	0	0	0	0	0	0	1	0	0	0	31
ath-MIR168a	+	2637	GATCCAAGAACAAAAGT	0	0	0	1	0	0	0	0	0	0	0	0	0
ath-MIR168a	+	5690	GATCCAATTGTTAACAC	0	0	0	1	0	2	0	0	0	0	0	0	16
ath-MIR168a	+	5938	GATCACCAACACTGCCA	0	0	0	1	9	0	0	0	0	4	0	0	1
ath-MIR168a	+	4429	GATCCTCCTGTGATATC	0	0	0	0	0	0	0	0	1	0	0	0	0
ath-MIR168a	+	371	GATCGTTACAGCAATCT	0	0	0	3	0	0	0	0	1	15	0	0	0
ath-MIR168a	+	2011	GATCCCCACTACCCAAAACA	0	0	1	0	0	0	0	0	0	0	0	0	0
ath-MIR168a	+	5690	GATCCAATTGTTAACACCCG	0	0	0	1	0	3	0	0	0	0	0	0	0
ath-MIR168a	+	25	GATCTGGAAGATTTCTACGC	0	0	0	2	0	0	0	22	0	0	0	0	0
ath-MIR168a	+	2181	GATCCTTCACAAAACATAGT	0	0	0	3	0	0	0	0	0	0	0	0	0
ath-MIR168a	+	9286	GATCAGCTGCTCGCGGAGCC	0	0	0	2	0	0	0	0	0	0	0	0	0
ath-MIR168a	+	5938	GATCACCAACACTGCCAATA	0	0	0	1	7	0	0	0	0	5	0	0	0
ath-MIR168a	+	3333	GATCCGATTTGGAAAACAAA	5	17	5	10	7	0	5	16	7	19	8	24	21
ath-MIR168a	+	4429	GATCCTCCTGTGATATCTTT	0	0	0	0	0	0	0	0	1	0	0	0	0
ath-MIR168a	+	2637	GATCCAAGAACAAAAGTCTC	0	0	0	1	0	0	0	0	0	0	0	0	0
ath-MIR168a	+	3895	GATCAAGCTTACAATTCTTC	0	0	0	0	0	0	0	0	1	0	0	0	44
ath-MIR168a	+	4861	GATCATCAACCACCGCACGC	0	0	0	0	0	3	0	0	12	0	0	0	1
ath-MIR168a	+	371	GATCGTTACAGCAATCTAAT	0	0	0	2	0	0	0	0	0	10	0	0	0
ath-MIR391	+	8402	GATCACAATCACGGCGA	1	0	0	5	0	6	0	0	0	0	3	0	0
ath-MIR391	+	3172	GATCCAAGATGCCATGT	0	0	1	0	3	0	0	0	0	0	0	0	0
ath-MIR391	+	6904	GATCCTGCAACTACAAA	0	0	6	0	2	0	0	0	0	5	0	0	0
ath-MIR391	+	7288	GATCAGATAATCCATTT	0	0	0	0	0	0	0	0	0	2	0	0	0
ath-MIR391	+	8674	GATCGTTGATTGAGAAG	0	0	0	0	0	0	0	0	0	0	0	2	0
ath-MIR391	+	6342	GATCACTCCAGGGCCTG	0	0	0	0	0	0	0	0	0	0	0	0	3
ath-MIR391	+	6757	GATCCCTCACTTCAAAT	0	0	0	1	0	0	0	0	0	0	0	0	0
ath-MIR391	+	6704	GATCTGAAGCAAACGAT	0	0	0	1	0	0	0	0	0	0	0	0	5
ath-MIR391	+	7467	GATCATCAGACAAGACA	89	27	23	30	23	17	34	20	40	48	17	32	57
ath-MIR391	+	1835	GATCGGTTGCTGTATGG	0	0	0	4	0	0	0	0	0	0	0	0	2
ath-MIR391	+	8744	GATCCGTTTCGTTGAAA	0	0	2	0	0	0	0	0	0	0	0	0	0
ath-MIR391	+	2534	GATCTTGACCCTTCTTT	0	0	0	0	0	0	0	0	3	0	0	0	0
ath-MIR391	+	6904	GATCCTGCAACTACAAACGG	0	0	7	0	2	0	0	0	0	5	0	0	0
ath-MIR391	+	8744	GATCCGTTTCGTTGAAAAAG	0	0	1	0	0	0	0	0	0	0	0	0	0
ath-MIR391	+	7467	GATCATCAGACAAGACACCG	97	32	27	33	25	17	32	17	42	53	18	36	69
ath-MIR391	+	8402	GATCACAATCACGGCGAGTC	1	0	0	6	0	0	0	0	0	0	2	0	0
ath-MIR391	+	8674	GATCGTTGATTGAGAAGCTG	0	3	0	0	0	0	0	0	0	0	0	2	0
ath-MIR391	+	6757	GATCCCTCACTTCAAATATT	0	0	0	1	0	0	0	0	0	0	0	0	0
ath-MIR391	+	3172	GATCCAAGATGCCATGTTTG	0	0	1	0	3	0	0	0	0	0	0	0	0
ath-MIR391	+	1835	GATCGGTTGCTGTATGGAGA	0	0	0	2	0	0	0	0	0	0	0	0	0
ath-MIR391	+	2534	GATCTTGACCCTTCTTTCTG	0	0	0	0	0	0	0	0	3	0	0	0	0
ath-MIR391	+	6342	GATCACTCCAGGGCCTGCAT	0	0	0	0	0	0	0	0	0	0	0	0	3
ath-MIR391	+	7288	GATCAGATAATCCATTTTCA	0	0	0	0	0	0	0	0	0	2	0	0	0
ath-MIR391	+	6704	GATCTGAAGCAAACGATGGC	0	0	0	0	0	0	0	0	0	0	0	0	4
ath-MIR5020b	-	8631	GATCCCAATTGCATTCA	0	1	0	0	0	0	0	0	0	0	0	0	0
ath-MIR5020b	-	9596	GATCTTAGATTGAGCAA	0	0	0	0	0	0	0	0	3	0	0	0	0
ath-MIR5020b	-	6858	GATCTTAGTAGGAGTAG	0	0	0	0	0	0	0	0	0	0	0	0	2
ath-MIR5020b	-	8631	GATCCCAATTGCATTCAACT	0	1	0	0	0	0	0	0	0	0	0	0	0
ath-MIR5020b	-	9596	GATCTTAGATTGAGCAAGGC	0	0	0	0	0	0	0	0	3	0	0	0	0
ath-MIR393a	+	8873	GATCGAAATGTTGCCGA	0	2	0	0	0	0	0	0	0	0	0	0	0
ath-MIR393a	+	5678	GATCATGGCGAGAGGCG	46	110	63	48	18	101	56	15	92	11	115	23	24
ath-MIR393a	+	5636	GATCAAAGGAAACCCAT	0	0	3	0	0	0	0	0	0	0	0	0	0
ath-MIR393a	+	7737	GATCTCTTTAATACAGT	0	0	0	0	0	0	0	0	0	1	0	0	0
ath-MIR393a	+	6890	GATCTCAAAAACGATGT	0	37	57	151	76	61	21	0	61	0	44	0	22
ath-MIR393a	+	9889	GATCATGAATGAGATGC	0	0	0	0	0	0	0	0	0	0	0	0	2
ath-MIR393a	+	6890	GATCTCAAAAACGATGTCGT	0	38	63	163	86	65	22	0	63	0	43	0	28
ath-MIR393a	+	9889	GATCATGAATGAGATGCTCG	0	0	0	0	0	0	0	0	0	0	0	0	1
ath-MIR393a	+	8873	GATCGAAATGTTGCCGATAG	0	2	0	0	0	0	0	0	0	0	0	0	0
ath-MIR393a	+	5678	GATCATGGCGAGAGGCGGGT	54	117	65	55	20	114	61	17	98	12	119	28	27
ath-MIR858	-	6154	GATCAATTTACGTTTCA	0	0	0	0	0	0	0	0	0	0	0	23	0
ath-MIR858	-	6007	GATCATGAATTGATGAT	0	0	0	0	0	0	0	0	0	0	3	7	0
ath-MIR858	-	9150	GATCAGCTTTTCCAGGA	0	2	6	3	7	0	0	0	2	0	0	0	2
ath-MIR858	-	8714	GATCGTAACAGTGGCAA	1	0	2	0	0	0	0	0	16	29	0	0	2
ath-MIR858	-	3564	GATCTGGAGAAGCTAAA	0	0	0	0	0	0	0	17	0	0	0	0	0
ath-MIR858	-	9673	GATCAAACTCAACCTCT	0	3	0	0	0	0	0	0	0	0	0	0	0
ath-MIR858	-	3564	GATCTGGAGAAGCTAAACGA	0	0	0	0	0	0	0	20	0	0	0	0	0
ath-MIR858	-	8714	GATCGTAACAGTGGCAAATC	1	0	2	0	0	0	0	0	18	31	0	0	4
ath-MIR858	-	6154	GATCAATTTACGTTTCATCA	0	0	0	0	0	0	0	0	0	0	0	25	0
ath-MIR858	-	9673	GATCAAACTCAACCTCTGTC	0	1	0	0	0	0	0	0	0	0	0	0	0
ath-MIR858	-	9150	GATCAGCTTTTCCAGGATAG	0	3	7	3	8	0	0	0	1	0	0	1	4
ath-MIR858	-	6007	GATCATGAATTGATGATGTT	0	0	0	0	0	0	0	0	0	0	4	8	0
ath-MIR1886	+	7952	GATCTTCTTTGGTGCGA	0	0	5	16	0	0	0	17	0	0	5	0	30
ath-MIR1886	+	8059	GATCCAACTTTGGCGGC	1	5	1	2	0	0	0	0	0	7	21	7	0
ath-MIR1886	+	730	GATCTTTTGGATTTTAG	32	17	0	28	0	8	0	0	12	18	17	11	0
ath-MIR1886	+	6479	GATCCCAAACGCAACGC	0	0	0	0	2	0	0	0	0	0	0	0	12
ath-MIR1886	+	2124	GATCAGTAGCGGAGAAG	0	4	0	0	1	0	0	0	1	0	5	0	13
ath-MIR1886	+	1667	GATCCAAGTGACTTGGA	0	5	0	0	0	0	0	0	9	1	14	4	4
ath-MIR1886	+	2170	GATCTCTGCGGCTAGTC	0	2	0	0	0	0	0	0	0	0	0	1	0
ath-MIR1886	+	445	GATCTGGACACGACCTG	0	0	0	0	0	0	0	0	0	0	0	0	5
ath-MIR1886	+	2238	GATCATAGTAAGAGCTT	0	0	0	0	0	0	0	0	2	0	13	5	3
ath-MIR1886	+	6665	GATCACCGGAACCGGTA	50	74	15	6	0	0	0	0	31	18	152	26	0
ath-MIR1886	+	9233	GATCAAAGAGTCATCTG	3	0	5	2	4	2	0	0	0	3	3	5	0
ath-MIR1886	+	7633	GATCTTTCCCATCCACA	0	1	4	4	4	2	0	0	0	0	11	0	0
ath-MIR1886	+	8109	GATCGAAGTTCCGAAAC	0	0	0	0	0	0	0	0	0	0	0	0	1
ath-MIR1886	+	1938	GATCGGAATAGTGGCCA	0	0	0	0	0	0	0	0	10	0	0	5	38
ath-MIR1886	+	5848	GATCCTCCGCCAACACC	0	2	2	0	0	0	0	0	0	0	0	0	0
ath-MIR1886	+	6060	GATCTTCATCCTTGTCT	0	3	0	0	0	0	0	0	8	0	0	0	0
ath-MIR1886	+	7730	GATCCTAGCAATCTCAG	0	0	1	10	0	1	0	0	0	0	33	0	11
ath-MIR1886	+	2543	GATCATGCCACCAAAAG	0	0	0	0	0	0	0	0	6	3	0	0	65
ath-MIR1886	+	2755	GATCTTCGTAGTCTCTT	0	0	0	0	0	0	0	0	0	0	0	6	29
ath-MIR1886	+	7633	GATCTTTCCCATCCACAGTA	0	1	5	5	5	2	0	0	0	0	12	0	0
ath-MIR1886	+	6665	GATCACCGGAACCGGTATCA	55	85	17	8	0	0	0	0	33	20	173	24	0
ath-MIR1886	+	2543	GATCATGCCACCAAAAGCCC	0	0	0	0	0	0	0	0	7	4	0	0	0
ath-MIR1886	+	8059	GATCCAACTTTGGCGGCATT	0	6	0	2	0	0	0	0	0	4	21	5	0
ath-MIR1886	+	2170	GATCTCTGCGGCTAGTCCGG	0	3	0	0	0	0	0	0	0	0	0	3	0
ath-MIR1886	+	7952	GATCTTCTTTGGTGCGAGAC	0	0	6	20	0	0	0	18	0	0	6	0	45
ath-MIR1886	+	7730	GATCCTAGCAATCTCAGTCA	0	0	1	12	0	1	0	0	0	0	40	0	10
ath-MIR1886	+	1667	GATCCAAGTGACTTGGAACC	0	5	0	0	0	0	0	0	10	1	18	4	5
ath-MIR1886	+	6060	GATCTTCATCCTTGTCTACT	0	4	0	0	0	0	0	0	6	0	0	0	0
ath-MIR1886	+	6479	GATCCCAAACGCAACGCTAG	0	0	0	0	2	0	0	0	0	0	0	0	0
ath-MIR1886	+	1938	GATCGGAATAGTGGCCAAAT	0	0	0	0	0	0	0	0	11	0	0	3	53
ath-MIR1886	+	2124	GATCAGTAGCGGAGAAGACT	0	4	0	0	1	0	0	0	0	0	6	0	5
ath-MIR1886	+	445	GATCTGGACACGACCTGACA	0	0	0	0	0	0	0	0	0	0	0	0	7
ath-MIR1886	+	2755	GATCTTCGTAGTCTCTTGTC	0	0	0	0	0	0	0	0	0	0	0	6	45
ath-MIR1886	+	730	GATCTTTTGGATTTTAGGGT	34	21	0	12	0	0	0	0	13	20	17	11	0
ath-MIR1886	+	9233	GATCAAAGAGTCATCTGGGA	4	0	6	3	5	3	0	0	0	2	4	5	0
ath-MIR1886	+	5848	GATCCTCCGCCAACACCGTT	0	3	2	0	0	0	0	0	0	0	0	0	0
ath-MIR1886	+	2238	GATCATAGTAAGAGCTTTGA	0	0	0	0	0	0	0	0	2	0	16	5	0
ath-MIR849	-	4089	GATCGGAAGAGCTAAGT	0	4	0	8	0	0	0	0	0	0	0	1	0
ath-MIR849	-	3823	GATCTGTAAATAAAAGG	0	0	0	0	0	0	0	0	0	0	0	0	7
ath-MIR849	-	3055	GATCGTAGCTTGCCACA	0	0	0	0	1	0	0	0	0	0	2	0	10
ath-MIR849	-	522	GATCTTTCCACCATGGC	2	0	0	0	0	0	0	0	0	0	0	0	0
ath-MIR849	-	3823	GATCTGTAAATAAAAGGCGG	0	0	0	0	0	0	0	0	0	0	0	0	8
ath-MIR849	-	4089	GATCGGAAGAGCTAAGTCCC	0	5	0	9	0	0	0	0	0	0	0	1	0
ath-MIR849	-	3055	GATCGTAGCTTGCCACAAGC	0	0	0	0	2	0	0	0	0	0	2	0	0
ath-MIR869	-	7459	GATCCCTTTAGTCATCA	0	5	0	0	2	0	0	0	0	0	16	0	0
ath-MIR869	-	8096	GATCTTTGCTCTTCTTC	0	0	2	0	0	0	0	3	0	0	0	0	0
ath-MIR869	-	3388	GATCTTCTCTTTCTTAG	0	0	0	0	0	0	0	0	0	0	5	0	0
ath-MIR869	-	8913	GATCTTATTTATGATAT	0	0	0	0	0	0	0	0	0	6	0	0	0
ath-MIR869	-	8211	GATCAGACCAAACAAAG	0	0	0	0	0	0	0	2	0	0	2	0	0
ath-MIR869	-	3078	GATCTGCTGCTTAAGCA	0	0	0	0	0	22	0	0	0	0	0	0	0
ath-MIR869	-	8096	GATCTTTGCTCTTCTTCTCG	0	0	2	0	0	0	0	4	0	0	0	0	0
ath-MIR869	-	8913	GATCTTATTTATGATATGTT	0	0	0	0	0	0	0	0	0	3	0	0	0
ath-MIR869	-	3078	GATCTGCTGCTTAAGCAAAG	0	0	0	0	0	25	0	0	0	0	0	0	0
ath-MIR869	-	7459	GATCCCTTTAGTCATCAATC	0	6	0	0	2	0	0	0	0	0	18	0	0
ath-MIR390b	+	4640	GATCTTCGTCCAAGAGA	0	0	0	0	0	0	0	0	0	1	0	0	0
ath-MIR390b	+	4862	GATCAAAGCTGTTTCTG	0	0	0	0	0	0	14	0	0	0	0	0	0
ath-MIR390b	+	3125	GATCACTGTCACCTCCA	0	3	0	0	0	0	0	0	0	0	0	0	0
ath-MIR390b	+	910	GATCAGACACAAGTGCC	0	0	0	1	0	0	0	0	0	0	0	0	0
ath-MIR390b	+	1306	GATCCCCAAAGAAACAG	0	0	1	0	0	0	0	0	0	0	0	0	5
ath-MIR390b	+	7059	GATCCATATTCGAAAGG	69	62	31	83	67	103	1	3	22	76	78	22	11
ath-MIR390b	+	2368	GATCTTCATAAGCCAGA	0	2	0	0	0	0	0	0	0	0	0	0	0
ath-MIR390b	+	3439	GATCACCTCCTTGATAT	0	1	0	0	0	0	0	0	0	0	0	0	0
ath-MIR390b	+	2642	GATCCTTGAGTTCATCA	0	0	0	0	0	0	0	0	0	0	0	0	1
ath-MIR390b	+	8315	GATCGTCTTTTCCATCT	0	0	0	0	0	0	0	0	0	1	0	0	0
ath-MIR390b	+	6593	GATCAAGAATGAGGAAT	0	0	5	0	0	0	0	0	0	0	0	0	7
ath-MIR390b	+	6276	GATCTCCTACAATACGA	0	0	0	0	0	0	0	0	0	0	0	0	7
ath-MIR390b	+	6276	GATCTCCTACAATACGACAC	0	0	0	0	0	0	0	0	0	0	0	0	6
ath-MIR390b	+	910	GATCAGACACAAGTGCCTAG	0	0	0	1	0	0	0	0	0	0	0	0	0
ath-MIR390b	+	7059	GATCCATATTCGAAAGGAAG	84	68	37	100	75	121	1	3	24	87	89	26	18
ath-MIR390b	+	1306	GATCCCCAAAGAAACAGAAC	0	0	1	0	0	0	0	0	0	0	0	0	6
ath-MIR390b	+	3439	GATCACCTCCTTGATATCCA	0	1	0	0	0	0	0	0	0	0	0	0	0
ath-MIR390b	+	2368	GATCTTCATAAGCCAGACAG	0	3	0	0	0	0	0	0	0	0	0	0	0
ath-MIR390b	+	4862	GATCAAAGCTGTTTCTGTAG	0	0	0	0	0	0	15	0	0	0	0	0	0
ath-MIR390b	+	4640	GATCTTCGTCCAAGAGACTT	0	0	0	0	0	0	0	0	0	1	0	0	0
ath-MIR390b	+	6593	GATCAAGAATGAGGAATGTT	0	0	5	0	0	0	0	0	0	0	0	0	5
ath-MIR390b	+	2642	GATCCTTGAGTTCATCAGTT	0	0	0	0	0	0	0	0	0	0	0	0	1
ath-MIR164b	+	5921	GATCTAGCTTTGTTCGA	0	0	0	0	0	3	0	0	0	0	0	0	0
ath-MIR164b	+	2764	GATCTGCTGTACACGGT	0	0	0	0	0	0	0	0	0	0	0	0	2
ath-MIR164b	+	823	GATCTCCCTCTTCTTTT	0	0	0	0	0	0	0	0	0	0	4	0	0
ath-MIR164b	+	9534	GATCCTTCCTTCACGAG	0	0	0	0	0	0	0	0	0	0	0	0	4
ath-MIR164b	+	7449	GATCCATCCGCAAAACC	0	0	0	1	0	0	0	0	0	0	0	0	0
ath-MIR164b	+	6425	GATCTTAACGTTTTCCG	0	1	3	0	0	0	0	0	0	0	0	0	0
ath-MIR164b	+	2420	GATCGTACGGAAGATGA	0	0	0	0	0	1	0	0	0	0	1	0	0
ath-MIR164b	+	2382	GATCCAAAGTACTGCGC	0	0	0	0	0	0	14	0	1	0	0	0	0
ath-MIR164b	+	6699	GATCTTCTCATCGGAGG	0	2	0	0	0	0	0	0	0	0	0	0	0
ath-MIR164b	+	3456	GATCATCTCAGTTGTAA	163	46	16	143	188	182	119	275	215	315	86	250	2
ath-MIR164b	+	2786	GATCGTCGATGCTTCAG	0	0	0	3	0	0	0	0	0	0	0	0	0
ath-MIR164b	+	7233	GATCGAGTCCAGGCTGA	0	0	2	0	0	0	0	0	0	0	0	0	0
ath-MIR164b	+	3456	GATCATCTCAGTTGTAAAAT	193	49	17	161	217	207	131	304	240	353	96	277	2
ath-MIR164b	+	9534	GATCCTTCCTTCACGAGCCA	0	0	0	0	0	0	0	0	0	0	0	0	5
ath-MIR164b	+	6699	GATCTTCTCATCGGAGGCTA	0	2	0	0	0	0	0	0	0	0	0	0	0
ath-MIR164b	+	5921	GATCTAGCTTTGTTCGACAC	0	0	0	0	0	2	0	0	0	0	0	0	0
ath-MIR164b	+	2382	GATCCAAAGTACTGCGCTCC	0	0	0	0	0	0	16	0	1	0	0	0	0
ath-MIR164b	+	2420	GATCGTACGGAAGATGATGT	0	0	0	0	0	1	0	0	0	0	0	0	0
ath-MIR164b	+	7449	GATCCATCCGCAAAACCAGC	0	0	0	1	0	0	0	0	0	0	0	0	0
ath-MIR164b	+	6425	GATCTTAACGTTTTCCGGAA	0	1	2	0	0	0	0	0	0	0	0	0	0
ath-MIR164b	+	7233	GATCGAGTCCAGGCTGAAAG	0	0	3	0	0	0	0	0	0	0	0	0	0
ath-MIR169m	-	840	GATCTTCATGAATTCAT	0	0	2	0	0	0	0	0	8	0	2	0	0
ath-MIR169m	-	2766	GATCGACTCGAATGAGT	0	0	0	0	0	0	0	0	0	3	1	0	0
ath-MIR169m	-	8207	GATCGGGTTTGTTTGGC	0	0	0	0	0	0	0	0	0	0	0	0	10
ath-MIR169m	-	7918	GATCGCATTGTTTCATA	0	0	4	0	0	0	0	0	0	0	0	0	0
ath-MIR169m	-	7918	GATCGCATTGTTTCATACTT	0	0	5	0	0	0	0	0	0	0	0	0	0
ath-MIR169m	-	8207	GATCGGGTTTGTTTGGCTCG	0	0	0	0	0	0	0	0	0	0	0	0	13
ath-MIR169m	-	2766	GATCGACTCGAATGAGTCTT	0	0	0	0	0	0	0	0	0	3	1	0	0
ath-MIR169n	-	1212	GATCTTCATGAATTCAT	0	0	2	0	0	0	0	0	8	0	2	0	0
ath-MIR169n	-	3138	GATCGACTCGAATGAGT	0	0	0	0	0	0	0	0	0	3	1	0	0
ath-MIR169n	-	8579	GATCGGGTTTGTTTGGC	0	0	0	0	0	0	0	0	0	0	0	0	10
ath-MIR169n	-	8290	GATCGCATTGTTTCATA	0	0	4	0	0	0	0	0	0	0	0	0	0
ath-MIR169n	-	8290	GATCGCATTGTTTCATACTT	0	0	5	0	0	0	0	0	0	0	0	0	0
ath-MIR169n	-	8579	GATCGGGTTTGTTTGGCTCG	0	0	0	0	0	0	0	0	0	0	0	0	13
ath-MIR169n	-	3138	GATCGACTCGAATGAGTCTT	0	0	0	0	0	0	0	0	0	3	1	0	0
ath-MIR406	-	9024	GATCTGATGAGTATAAA	0	0	0	9	0	0	0	0	0	0	0	0	0
ath-MIR406	-	1355	GATCGGACTAAGCATGA	2	0	0	0	0	0	0	0	2	3	0	0	0
ath-MIR406	-	6736	GATCCTATTGTTCTTGT	0	0	0	3	0	0	0	0	0	0	0	0	0
ath-MIR406	-	8246	GATCACCATACAGGTCT	0	0	0	0	0	0	0	0	0	0	0	0	2
ath-MIR406	-	9188	GATCTTCATTATTGTTC	1	0	2	2	0	0	0	0	0	8	13	14	0
ath-MIR406	-	6736	GATCCTATTGTTCTTGTGAA	0	0	0	1	0	0	0	0	0	0	0	0	0
ath-MIR406	-	1355	GATCGGACTAAGCATGAACA	2	0	0	0	0	0	0	0	2	3	0	0	0
ath-MIR406	-	8246	GATCACCATACAGGTCTTGC	0	0	0	0	0	0	0	0	0	0	0	0	2
ath-MIR406	-	9188	GATCTTCATTATTGTTCGTT	0	0	1	1	0	0	0	2	0	11	18	22	0
ath-MIR406	-	9024	GATCTGATGAGTATAAACAT	0	0	0	10	0	0	0	0	0	0	0	0	0
ath-MIR2939	+	4278	GATCAGAGAGCCAAGGA	0	7	5	0	0	6	0	0	0	0	0	0	49
ath-MIR2939	+	4788	GATCTACACACAGCCGC	0	3	9	3	1	6	1	0	0	0	0	0	58
ath-MIR2939	+	3433	GATCATCGTCTCTCCCA	0	0	3	0	0	0	0	0	0	0	0	0	13
ath-MIR2939	+	5356	GATCATAAACAGCGACA	433	584	300	628	256	566	438	146	253	279	57	32	236
ath-MIR2939	+	3754	GATCTATGTTCTTACTC	0	0	2	2	0	0	0	0	2	0	0	0	6
ath-MIR2939	+	3228	GATCGAATACTACAATG	0	0	0	0	0	7	0	0	0	0	0	0	0
ath-MIR2939	+	2140	GATCACAGGAACCAGAT	0	0	0	0	0	0	0	0	0	0	0	9	2
ath-MIR2939	+	2184	GATCCCTCTTATCCAAA	2	0	0	0	0	10	0	0	0	0	5	18	0
ath-MIR2939	+	3488	GATCCTGATGCTAGCAG	0	0	3	0	0	52	0	0	11	0	0	0	0
ath-MIR2939	+	2184	GATCCCTCTTATCCAAATAC	2	0	0	0	0	8	0	0	0	0	6	20	0
ath-MIR2939	+	4278	GATCAGAGAGCCAAGGAGAT	0	7	6	0	0	6	0	0	0	0	0	0	62
ath-MIR2939	+	3228	GATCGAATACTACAATGGCG	0	0	0	0	0	9	0	0	0	0	0	0	0
ath-MIR2939	+	5356	GATCATAAACAGCGACAACG	496	663	329	733	277	610	444	156	273	318	60	35	220
ath-MIR2939	+	3433	GATCATCGTCTCTCCCAAAG	0	0	3	0	0	0	0	0	0	0	0	0	14
ath-MIR2939	+	3754	GATCTATGTTCTTACTCAGT	0	0	2	2	0	0	0	0	2	0	0	0	8
ath-MIR2939	+	4788	GATCTACACACAGCCGCGTT	0	3	10	3	0	6	1	0	0	0	0	0	72
ath-MIR4243	+	3976	GATCAGAGAGCCAAGGA	0	7	5	0	0	6	0	0	0	0	0	0	49
ath-MIR4243	+	4486	GATCTACACACAGCCGC	0	3	9	3	1	6	1	0	0	0	0	0	58
ath-MIR4243	+	3131	GATCATCGTCTCTCCCA	0	0	3	0	0	0	0	0	0	0	0	0	13
ath-MIR4243	+	5054	GATCATAAACAGCGACA	433	584	300	628	256	566	438	146	253	279	57	32	236
ath-MIR4243	+	3452	GATCTATGTTCTTACTC	0	0	2	2	0	0	0	0	2	0	0	0	6
ath-MIR4243	+	2926	GATCGAATACTACAATG	0	0	0	0	0	7	0	0	0	0	0	0	0
ath-MIR4243	+	1838	GATCACAGGAACCAGAT	0	0	0	0	0	0	0	0	0	0	0	9	2
ath-MIR4243	+	1882	GATCCCTCTTATCCAAA	2	0	0	0	0	10	0	0	0	0	5	18	0
ath-MIR4243	+	3186	GATCCTGATGCTAGCAG	0	0	3	0	0	52	0	0	11	0	0	0	0
ath-MIR4243	+	1882	GATCCCTCTTATCCAAATAC	2	0	0	0	0	8	0	0	0	0	6	20	0
ath-MIR4243	+	3976	GATCAGAGAGCCAAGGAGAT	0	7	6	0	0	6	0	0	0	0	0	0	62
ath-MIR4243	+	2926	GATCGAATACTACAATGGCG	0	0	0	0	0	9	0	0	0	0	0	0	0
ath-MIR4243	+	5054	GATCATAAACAGCGACAACG	496	663	329	733	277	610	444	156	273	318	60	35	220
ath-MIR4243	+	3131	GATCATCGTCTCTCCCAAAG	0	0	3	0	0	0	0	0	0	0	0	0	14
ath-MIR4243	+	3452	GATCTATGTTCTTACTCAGT	0	0	2	2	0	0	0	0	2	0	0	0	8
ath-MIR4243	+	4486	GATCTACACACAGCCGCGTT	0	3	10	3	0	6	1	0	0	0	0	0	72
ath-MIR162a	-	4893	GATCGACTGGAATTTCA	0	4	0	2	2	1	0	0	0	0	0	0	11
ath-MIR162a	-	5661	GATCCTCAATACGAAAG	0	1	0	0	0	0	0	0	0	0	2	0	0
ath-MIR162a	-	6398	GATCAAACTTTGCTTGC	83	8	14	14	20	0	18	5	14	30	7	49	0
ath-MIR162a	-	2901	GATCTTGCGCAAGCAGG	61	32	250	142	74	164	42	65	50	43	456	227	182
ath-MIR162a	-	6343	GATCCTGTATTTTATGG	0	2	0	0	0	0	0	0	0	0	0	0	0
ath-MIR162a	-	866	GATCTCCATCCCCATGA	0	0	0	0	0	0	0	0	0	0	0	1	0
ath-MIR162a	-	2371	GATCTACATTCTCTGCT	0	0	0	4	0	0	0	0	0	1	0	0	0
ath-MIR162a	-	7049	GATCGTGAGGCAGCTCG	0	0	0	2	0	0	0	0	0	0	0	0	0
ath-MIR162a	-	7800	GATCATGCCATTATTTC	0	0	0	0	0	0	0	0	0	0	18	0	0
ath-MIR162a	-	8981	GATCGCTAAATTCACCA	0	3	0	0	26	0	2	0	0	0	0	0	0
ath-MIR162a	-	7800	GATCATGCCATTATTTCTGT	0	0	0	0	0	0	0	0	0	0	20	0	0
ath-MIR162a	-	2901	GATCTTGCGCAAGCAGGGGC	67	33	272	159	81	169	42	70	49	48	479	234	206
ath-MIR162a	-	2371	GATCTACATTCTCTGCTTTT	0	0	0	4	0	0	0	0	0	1	0	0	0
ath-MIR162a	-	7049	GATCGTGAGGCAGCTCGGCG	0	0	0	2	0	0	0	0	0	0	0	0	0
ath-MIR162a	-	8981	GATCGCTAAATTCACCAAAT	0	0	0	0	0	0	0	0	9	0	0	0	0
ath-MIR162a	-	5661	GATCCTCAATACGAAAGGTC	0	0	0	0	0	0	0	0	0	0	0	0	3
ath-MIR162a	-	866	GATCTCCATCCCCATGATAT	0	0	0	0	0	0	0	0	0	0	0	1	0
ath-MIR162a	-	6398	GATCAAACTTTGCTTGCATT	94	9	11	16	22	0	18	3	13	33	8	54	0
ath-MIR162a	-	4893	GATCGACTGGAATTTCAATG	0	4	0	3	2	1	0	0	0	0	0	0	13
ath-MIR162a	-	6343	GATCCTGTATTTTATGGTTC	0	2	0	0	0	0	0	0	0	0	0	0	0
ath-MIR169a	-	282	GATCTTGATGAATTTCA	0	0	0	2	0	0	0	0	12	0	2	0	0
ath-MIR169a	-	2482	GATCTGAACTGATTGAG	0	8	0	0	0	18	0	0	0	0	0	0	0
ath-MIR169a	-	6766	GATCTTTCAGGTGGAAC	0	2	1	0	0	1	0	0	0	0	0	0	0
ath-MIR169a	-	6400	GATCCGATGCACCTCTC	0	0	3	0	0	0	0	0	0	0	0	0	0
ath-MIR169a	-	7433	GATCTGAAAACTCCGAG	33	183	93	0	0	122	0	0	0	0	0	0	0
ath-MIR169a	-	2229	GATCTTGGCTGCTGGTT	0	10	10	0	0	8	0	0	0	0	0	0	0
ath-MIR169a	-	3096	GATCTGGTCCTTAGGCT	0	4	2	0	0	0	0	0	0	0	0	0	0
ath-MIR169a	-	2896	GATCCTAGAGTACGTCC	2	5	4	0	0	3	0	0	0	0	0	0	0
ath-MIR169a	-	1843	GATCTGATGTTCCACAT	0	1	1	0	0	20	0	0	0	0	0	0	0
ath-MIR169a	-	6836	GATCAACATCACACGCA	0	2	0	0	0	0	0	0	0	0	0	0	0
ath-MIR169a	-	2796	GATCCTGTACTTGTAAG	0	0	1	0	0	0	0	0	0	0	0	0	0
ath-MIR169a	-	2431	GATCCCTGGGGGTTAGG	0	0	2	0	0	3	0	0	0	0	0	0	0
ath-MIR169a	-	8403	GATCGTCCAAACATTGA	0	0	2	0	0	0	0	0	0	0	0	0	0
ath-MIR169a	-	7932	GATCATCTTCTTTGTCT	34	17	1	0	0	17	0	0	0	0	0	0	0
ath-MIR169a	-	9464	GATCTCGTGGGCCGGGA	0	0	0	0	0	0	0	0	0	0	0	0	2
ath-MIR169a	-	7433	GATCTGAAAACTCCGAGAGA	37	202	108	0	0	144	0	0	0	0	0	0	0
ath-MIR169a	-	3096	GATCTGGTCCTTAGGCTGGA	0	4	2	0	0	0	0	0	0	0	0	0	0
ath-MIR169a	-	282	GATCTTGATGAATTTCACTG	0	0	0	3	0	0	0	0	9	0	1	0	0
ath-MIR169a	-	9464	GATCTCGTGGGCCGGGAACC	0	0	0	0	0	0	0	0	0	0	0	0	2
ath-MIR169a	-	6400	GATCCGATGCACCTCTCTTT	0	0	2	0	0	0	0	0	0	0	0	0	0
ath-MIR169a	-	1843	GATCTGATGTTCCACATACC	0	1	1	0	0	12	0	0	0	0	0	0	0
ath-MIR169a	-	2229	GATCTTGGCTGCTGGTTCGT	0	11	11	0	0	10	0	0	0	0	0	0	0
ath-MIR169a	-	2796	GATCCTGTACTTGTAAGTCT	0	0	1	0	0	0	0	0	0	0	0	0	0
ath-MIR169a	-	6766	GATCTTTCAGGTGGAACTTG	0	2	1	0	0	1	0	0	0	0	0	0	0
ath-MIR169a	-	2896	GATCCTAGAGTACGTCCGCT	2	6	5	0	0	4	0	0	0	0	0	0	0
ath-MIR169a	-	7932	GATCATCTTCTTTGTCTGAC	4	3	1	0	0	1	0	0	0	0	0	0	0
ath-MIR169a	-	2482	GATCTGAACTGATTGAGAGA	0	9	0	0	0	14	0	0	0	0	0	0	0
ath-MIR395f	+	1085	GATCAGAAATCGGGAGA	0	0	0	11	0	0	0	0	1	0	0	0	5
ath-MIR395f	+	1112	GATCAAACCAATCTCTA	0	0	1	0	0	0	0	0	0	0	9	0	0
ath-MIR395f	+	6462	GATCATAAGAAACCGAG	0	0	0	0	0	3	0	0	0	0	0	0	0
ath-MIR395f	+	1798	GATCTTTACTGCTTCTG	0	0	0	1	0	0	0	0	0	0	0	0	0
ath-MIR395f	+	525	GATCACATCCCTCAGTG	0	2	0	0	0	0	0	0	0	0	0	0	0
ath-MIR395f	+	4381	GATCAATGTGGTCTAGC	0	0	0	0	0	0	0	0	0	0	0	0	6
ath-MIR395f	+	445	GATCATCGGTTAAGCAT	0	0	0	0	1	0	0	0	0	0	0	0	0
ath-MIR395f	+	3169	GATCTCTCTTTCAGAGG	0	0	0	0	0	0	0	0	0	0	2	0	2
ath-MIR395f	+	5186	GATCTGCTCTTTTTGTT	0	0	0	0	0	0	0	11	0	0	0	0	0
ath-MIR395f	+	4381	GATCAATGTGGTCTAGCTCC	0	0	0	0	0	0	0	0	0	0	0	0	4
ath-MIR395f	+	6462	GATCATAAGAAACCGAGCAG	0	0	0	0	0	2	0	0	0	0	0	0	0
ath-MIR395f	+	5186	GATCTGCTCTTTTTGTTTTT	0	0	0	0	0	0	0	13	0	0	0	0	0
ath-MIR395f	+	8819	GATCCAAACGGCCACGACAA	0	0	0	2	0	0	0	0	0	0	0	0	0
ath-MIR395f	+	3169	GATCTCTCTTTCAGAGGCTG	0	0	0	0	0	0	0	0	0	0	2	0	2
ath-MIR395f	+	1112	GATCAAACCAATCTCTACCT	0	0	1	0	0	0	0	0	0	0	10	0	0
ath-MIR395f	+	445	GATCATCGGTTAAGCATTTC	0	0	0	0	1	0	0	0	0	0	0	0	0
ath-MIR395f	+	1085	GATCAGAAATCGGGAGAGCG	0	0	0	12	0	0	0	0	1	0	0	0	5
ath-MIR395f	+	525	GATCACATCCCTCAGTGTTA	0	1	0	0	0	0	0	0	0	0	0	0	0
ath-MIR395f	+	1798	GATCTTTACTGCTTCTGATA	0	0	0	1	0	0	0	0	0	0	0	0	0
ath-MIR1888	+	606	GATCAGTGTGCACCTCA	0	0	0	0	0	0	0	0	3	0	0	0	0
ath-MIR1888	+	346	GATCATCGGGACTATAC	0	2	0	0	0	0	0	0	0	0	0	0	0
ath-MIR1888	+	4826	GATCGTTGATTGTGGAC	0	0	0	0	0	0	0	0	0	0	0	0	5
ath-MIR1888	+	916	GATCTCCGTCGGCGTTC	0	0	11	0	0	0	0	0	0	0	0	0	0
ath-MIR1888	+	7785	GATCACCATCGCCGCCG	0	0	0	0	0	0	0	0	10	0	0	0	2
ath-MIR1888	+	8573	GATCGGGATTAGTTCAG	208	23	37	45	13	10	1	5	71	55	62	109	65
ath-MIR1888	+	1880	GATCTCTTTCTAAATTA	18	0	0	0	0	0	0	0	0	28	0	0	0
ath-MIR1888	+	9938	GATCAATCTTTGTGGGA	0	0	0	0	0	0	0	0	0	0	2	0	0
ath-MIR1888	+	9662	GATCAAGATCATGGACC	0	0	0	0	0	0	0	0	0	1	0	0	0
ath-MIR1888	+	518	GATCAATGGAAGAGGAC	0	0	1	0	2	0	0	0	0	0	0	0	0
ath-MIR1888	+	7870	GATCAACAACGTCTCTC	0	8	0	23	0	0	0	0	18	0	12	0	0
ath-MIR1888	+	5481	GATCAGTGCGCCCCACA	0	0	1	1	0	0	0	0	5	0	0	0	0
ath-MIR1888	+	1914	GATCTCTTAAGTGTATG	35	4	2	8	19	30	0	0	0	22	0	0	0
ath-MIR1888	+	1840	GATCAAAGAAAATATGT	0	0	0	0	0	0	0	0	0	3	0	0	0
ath-MIR1888	+	606	GATCAGTGTGCACCTCAAAC	0	0	0	0	0	0	0	0	3	0	0	0	0
ath-MIR1888	+	1880	GATCTCTTTCTAAATTATTT	6	0	0	0	0	0	0	0	0	31	0	0	0
ath-MIR1888	+	346	GATCATCGGGACTATACGGA	0	2	0	0	0	0	0	0	0	0	0	0	0
ath-MIR1888	+	8573	GATCGGGATTAGTTCAGCGA	247	27	38	50	13	13	1	5	76	62	74	126	83
ath-MIR1888	+	7785	GATCACCATCGCCGCCGAAG	0	0	0	0	0	0	0	0	10	0	0	0	2
ath-MIR1888	+	1914	GATCTCTTAAGTGTATGATT	40	4	2	9	21	33	0	0	0	24	0	0	0
ath-MIR1888	+	1840	GATCAAAGAAAATATGTTTA	0	0	0	0	0	0	0	0	0	2	0	0	0
ath-MIR1888	+	5481	GATCAGTGCGCCCCACAGAT	0	0	0	1	0	0	0	0	4	0	0	0	0
ath-MIR1888	+	4826	GATCGTTGATTGTGGACGTG	0	0	0	0	0	0	0	0	0	0	0	0	8
ath-MIR1888	+	7870	GATCAACAACGTCTCTCTAG	0	4	0	7	0	0	0	0	9	0	7	0	0
ath-MIR1888	+	518	GATCAATGGAAGAGGACAGT	0	0	1	0	2	0	0	0	0	0	0	0	0
ath-MIR1888	+	916	GATCTCCGTCGGCGTTCGTG	0	0	13	0	0	0	0	0	0	0	0	0	0
ath-MIR5014	+	2076	GATCCAGACAAAGCAGC	0	6	4	0	0	0	17	0	3	0	0	0	0
ath-MIR5014	+	2433	GATCAACCCACTTTCAC	0	3	0	7	2	0	0	1	0	0	0	0	3
ath-MIR5014	+	2225	GATCCACGTGGATGCAG	0	0	2	4	5	0	0	0	6	0	0	0	14
ath-MIR5014	+	6275	GATCTCATCAACACCCT	0	4	0	10	1	0	0	0	0	0	0	3	0
ath-MIR5014	+	4186	GATCTCTGTGGTTTTGA	0	0	0	0	0	0	0	0	0	0	0	2	0
ath-MIR5014	+	3093	GATCGCGGAAAATGTAA	0	23	8	26	23	13	27	9	21	3	0	0	18
ath-MIR5014	+	2137	GATCCACACTCAACGGT	0	0	5	2	0	0	0	7	13	0	0	2	18
ath-MIR5014	+	5555	GATCATCAAGTAACAGA	0	4	5	0	0	0	0	0	0	1	0	1	0
ath-MIR5014	+	2886	GATCTCTGAGATGCTAC	0	1	0	4	0	0	0	0	4	0	0	0	0
ath-MIR5014	+	6710	GATCTCTGTGGAGTTGA	0	16	5	2	5	0	2	3	0	10	0	11	0
ath-MIR5014	+	2916	GATCGTCCCAGCTTACA	0	12	1	7	0	0	0	0	27	2	8	0	0
ath-MIR5014	+	6638	GATCATTCTCATCGAAG	0	0	0	0	0	0	0	0	0	0	0	19	5
ath-MIR5014	+	2558	GATCGAGCCAAATTATT	0	0	3	0	0	0	0	0	0	0	1	0	0
ath-MIR5014	+	3289	GATCCAGTTATTATGGA	561	156	42	208	284	98	271	114	122	811	10	310	3
ath-MIR5014	+	6638	GATCATTCTCATCGAAGAAG	0	0	0	0	0	0	0	0	0	0	0	19	6
ath-MIR5014	+	2916	GATCGTCCCAGCTTACACTA	0	11	1	3	0	0	0	0	18	3	8	0	0
ath-MIR5014	+	5555	GATCATCAAGTAACAGAGCA	0	4	2	0	0	0	0	0	0	2	0	2	0
ath-MIR5014	+	6710	GATCTCTGTGGAGTTGACGA	0	6	3	4	8	0	0	2	0	14	2	11	2
ath-MIR5014	+	2886	GATCTCTGAGATGCTACGTC	0	1	0	4	0	0	0	0	1	0	0	0	0
ath-MIR5014	+	2137	GATCCACACTCAACGGTGAG	0	0	6	2	0	0	0	8	14	0	0	3	23
ath-MIR5014	+	2225	GATCCACGTGGATGCAGCAA	0	0	3	3	6	0	0	0	7	0	0	0	19
ath-MIR5014	+	2558	GATCGAGCCAAATTATTGCT	0	0	2	0	0	0	0	0	0	0	1	0	0
ath-MIR5014	+	4186	GATCTCTGTGGTTTTGAAGA	0	0	0	0	0	0	0	0	0	0	0	0	2
ath-MIR5014	+	2076	GATCCAGACAAAGCAGCAGA	0	7	5	0	0	0	19	0	3	0	0	0	0
ath-MIR5014	+	6275	GATCTCATCAACACCCTTTG	0	4	0	9	0	0	0	0	0	0	0	1	0
ath-MIR5014	+	3289	GATCCAGTTATTATGGATTA	529	137	37	193	226	66	188	118	108	681	15	261	0
ath-MIR5014	+	3093	GATCGCGGAAAATGTAAAGG	0	24	0	11	0	11	24	8	19	0	0	0	20
ath-MIR5014	+	2433	GATCAACCCACTTTCACTCT	0	3	4	7	1	0	0	1	0	0	0	0	3
ath-MIR782	+	2172	GATCGTGTCAATGCAGC	0	0	3	0	0	0	0	0	1	0	0	5	0
ath-MIR782	+	6301	GATCGATAGAAGGAGTA	0	0	2	1	0	0	0	0	3	0	0	0	0
ath-MIR782	+	6326	GATCATCATCACCTTCG	0	2	5	0	0	0	0	0	16	0	2	0	0
ath-MIR782	+	6469	GATCCATGAACCCAGCA	16	47	62	53	29	12	11	0	88	16	9	0	136
ath-MIR782	+	6961	GATCATCGTCATTAGGT	0	0	0	0	0	1	0	0	6	0	0	0	2
ath-MIR782	+	6695	GATCTTTCTTGTTTTGT	1819	981	423	850	995	210	56	6	879	3477	247	736	13
ath-MIR782	+	273	GATCTCGCTTTTTTTTT	0	0	0	0	0	0	0	0	0	3	0	9	0
ath-MIR782	+	6375	GATCCCAAGAAGGGTTC	0	10	16	9	7	21	0	0	43	0	2	0	28
ath-MIR782	+	3057	GATCCAAGAAGCTCATC	13	5	46	53	38	22	1	3	61	34	77	9	12
ath-MIR782	+	5804	GATCGCTCAGCTTCTCG	0	0	20	11	0	0	0	0	48	0	2	0	42
ath-MIR782	+	4468	GATCAAATCACTTGGAA	0	0	0	0	0	14	0	0	0	0	0	0	0
ath-MIR782	+	6469	GATCCATGAACCCAGCACGT	15	53	67	65	32	14	11	0	96	18	10	0	206
ath-MIR782	+	6961	GATCATCGTCATTAGGTATA	0	3	0	0	0	0	0	0	7	0	0	0	3
ath-MIR782	+	6301	GATCGATAGAAGGAGTAGTG	0	0	2	2	0	0	0	0	3	0	0	0	0
ath-MIR782	+	2172	GATCGTGTCAATGCAGCGTG	0	0	6	0	0	0	0	0	1	0	0	4	0
ath-MIR782	+	6695	GATCTTTCTTGTTTTGTTTG	2117	1122	486	1014	1182	250	61	7	963	4031	292	873	18
ath-MIR782	+	6326	GATCATCATCACCTTCGCTT	0	2	5	0	0	0	0	0	16	0	1	0	0
ath-MIR782	+	5804	GATCGCTCAGCTTCTCGGCT	0	0	18	10	0	0	0	0	46	0	3	0	40
ath-MIR782	+	3057	GATCCAAGAAGCTCATCTCT	16	6	54	63	43	26	2	3	67	39	93	9	18
ath-MIR782	+	6375	GATCCCAAGAAGGGTTCTCT	0	11	18	10	8	25	0	0	48	0	2	0	33
ath-MIR828	+	5375	GATCCCTAACATAACTA	0	5	2	4	0	0	4	3	0	0	0	0	0
ath-MIR828	+	3542	GATCATAATGGCTCTCT	0	0	0	0	0	2	1	0	0	0	0	0	0
ath-MIR828	+	973	GATCGGCTTTCGCAGAA	0	0	0	0	0	0	0	0	0	2	0	0	6
ath-MIR828	+	2438	GATCCGAGATTCTGCAA	0	0	2	0	0	0	0	0	0	0	0	0	0
ath-MIR828	+	4310	GATCATGATGAACTCTA	48	0	0	0	0	0	0	0	0	0	0	0	0
ath-MIR828	+	2510	GATCAAATGACTTAGTA	96	9	0	8	4	7	12	0	5	15	0	22	0
ath-MIR828	+	6793	GATCGCAATCGCGGAGC	0	0	0	1	0	0	0	1	0	5	0	0	1
ath-MIR828	+	6497	GATCCAGCTTGCAATGC	0	3	0	0	0	0	0	0	2	3	2	0	3
ath-MIR828	+	3189	GATCAAGTTCTTGTTTC	0	0	0	0	0	0	0	0	0	1	0	0	0
ath-MIR828	+	6267	GATCATTACAGTGGCTG	0	0	0	3	0	0	0	0	2	0	0	0	0
ath-MIR828	+	690	GATCGTCGTCACGTTTA	0	0	0	0	0	0	0	0	1	0	0	0	0
ath-MIR828	+	2412	GATCTCTGTGAATCAGA	21	7	19	11	12	0	0	10	16	15	67	33	0
ath-MIR828	+	973	GATCGGCTTTCGCAGAAGGT	0	0	0	0	0	0	0	0	0	2	0	0	9
ath-MIR828	+	4310	GATCATGATGAACTCTAACT	54	0	0	0	0	0	0	0	0	0	0	0	0
ath-MIR828	+	6793	GATCGCAATCGCGGAGCAAC	0	0	0	2	0	0	0	1	0	5	0	0	1
ath-MIR828	+	2510	GATCAAATGACTTAGTAAGA	33	0	0	0	0	0	6	0	8	10	0	18	0
ath-MIR828	+	3542	GATCATAATGGCTCTCTCGA	0	0	0	0	0	2	0	0	0	0	0	0	0
ath-MIR828	+	690	GATCGTCGTCACGTTTAAAG	0	0	0	0	0	0	0	0	1	0	0	0	0
ath-MIR828	+	6497	GATCCAGCTTGCAATGCACC	0	1	0	0	0	0	0	0	2	3	3	0	4
ath-MIR828	+	6267	GATCATTACAGTGGCTGTTG	0	0	0	3	0	0	0	0	2	0	0	0	0
ath-MIR828	+	5375	GATCCCTAACATAACTAACC	0	6	0	5	0	0	1	3	0	0	0	0	0
ath-MIR828	+	2438	GATCCGAGATTCTGCAAAGC	0	0	2	0	0	0	0	0	0	0	0	0	0
ath-MIR167c	-	1973	GATCGAAGAAGCGATGA	0	0	0	0	0	0	0	0	1	0	0	0	0
ath-MIR167c	-	9755	GATCATTGAAAGACTGA	0	0	0	0	0	0	0	0	1	0	0	0	0
ath-MIR167c	-	1917	GATCCTAATGTTGTGAC	0	2	0	0	0	0	0	0	0	0	0	0	0
ath-MIR167c	-	1222	GATCATGCCGTTCAGGG	0	0	0	0	0	0	0	0	0	0	0	0	8
ath-MIR167c	-	9012	GATCAATCTTAGCAAAT	0	0	0	0	1	0	0	0	0	0	0	0	0
ath-MIR167c	-	1087	GATCCTTTTCATCTTCA	0	0	4	0	0	0	0	0	0	0	0	0	0
ath-MIR167c	-	4427	GATCCGTCTGCAACTGA	0	0	0	0	0	0	0	0	0	0	1	0	0
ath-MIR167c	-	2043	GATCCTTTGATAGCTGC	0	0	1	0	0	0	0	0	0	0	0	0	0
ath-MIR167c	-	1631	GATCGAAGCTACGATGC	0	0	5	0	0	0	0	0	0	0	0	0	2
ath-MIR167c	-	4870	GATCAATCTTAAGTGCT	0	0	0	0	0	0	0	0	1	0	0	0	0
ath-MIR167c	-	2510	GATCAATGTTTTGGAAT	0	1	2	0	0	0	0	0	0	0	0	0	7
ath-MIR167c	-	2764	GATCCAGGTTTTCAAGA	11	2	0	4	0	0	7	0	23	0	0	0	0
ath-MIR167c	-	6417	GATCAAGAACAACGGTT	0	0	2	2	0	0	0	0	0	0	0	0	2
ath-MIR167c	-	2800	GATCACGTAGTTCTCAA	29	47	26	31	7	26	19	1	36	64	0	0	0
ath-MIR167c	-	7267	GATCCTGAAGCAACACT	0	2	0	3	0	0	0	0	0	0	1	0	0
ath-MIR167c	-	4782	GATCTGTTGTGTAGGGC	0	0	0	0	1	0	0	0	0	0	0	0	0
ath-MIR167c	-	5565	GATCACAAAGTCAAACT	11	4	0	17	8	16	0	0	16	11	8	0	0
ath-MIR167c	-	7055	GATCTGGTAACTGAGCA	0	0	0	0	0	0	0	0	0	0	0	0	2
ath-MIR167c	-	5222	GATCAAATAGCAATCTA	3	0	0	0	0	0	0	0	0	0	0	0	0
ath-MIR167c	-	7575	GATCCTTATCCAATAGG	0	0	2	0	0	0	0	0	0	0	0	0	0
ath-MIR167c	-	8558	GATCCCTAAAGTGTTGG	0	0	2	0	0	0	0	0	0	0	0	0	0
ath-MIR167c	-	2713	GATCTTCTCAGACATTT	4	4	0	0	5	0	0	0	1	4	0	0	0
ath-MIR167c	-	2800	GATCACGTAGTTCTCAAGGT	10	52	26	30	0	26	20	1	38	0	0	0	0
ath-MIR167c	-	9755	GATCATTGAAAGACTGAGGT	0	0	0	0	0	0	0	0	1	0	0	0	0
ath-MIR167c	-	9012	GATCAATCTTAGCAAATCTG	0	0	0	0	2	0	0	0	0	0	0	0	0
ath-MIR167c	-	7267	GATCCTGAAGCAACACTGGC	0	2	0	3	0	0	0	0	0	0	1	0	0
ath-MIR167c	-	2764	GATCCAGGTTTTCAAGAAAG	11	2	0	1	0	0	6	0	21	0	0	0	0
ath-MIR167c	-	1631	GATCGAAGCTACGATGCTCG	0	0	4	0	0	0	0	0	0	0	0	0	2
ath-MIR167c	-	1917	GATCCTAATGTTGTGACTTA	0	1	0	0	0	0	0	0	0	0	0	0	0
ath-MIR167c	-	4782	GATCTGTTGTGTAGGGCAGG	0	0	0	0	1	0	0	0	0	0	0	0	0
ath-MIR167c	-	2510	GATCAATGTTTTGGAATCAA	0	0	0	0	0	0	0	0	0	0	0	0	4
ath-MIR167c	-	4870	GATCAATCTTAAGTGCTTGT	0	0	0	0	0	0	0	0	1	0	0	0	0
ath-MIR167c	-	2713	GATCTTCTCAGACATTTGGT	4	4	0	0	0	0	0	0	1	3	0	0	0
ath-MIR167c	-	6417	GATCAAGAACAACGGTTAGC	0	0	2	3	0	0	0	0	0	0	0	0	2
ath-MIR167c	-	5565	GATCACAAAGTCAAACTGTT	13	4	0	20	8	15	0	0	17	13	7	0	0
ath-MIR167c	-	2043	GATCCTTTGATAGCTGCGTT	0	0	1	0	0	0	0	0	0	0	0	0	0
ath-MIR167c	-	5222	GATCAAATAGCAATCTAAGC	2	0	0	0	0	0	0	0	0	0	0	0	0
ath-MIR167c	-	7055	GATCTGGTAACTGAGCAAAT	0	0	0	0	0	0	0	0	0	0	0	0	3
ath-MIR167c	-	1222	GATCATGCCGTTCAGGGAAT	0	0	0	0	0	0	0	0	0	0	0	0	8
ath-MIR167c	-	1973	GATCGAAGAAGCGATGAATC	0	0	0	0	0	0	0	0	1	0	0	0	0
ath-MIR167c	-	8558	GATCCCTAAAGTGTTGGTCA	0	0	3	0	0	0	0	0	0	0	0	0	0
ath-MIR167c	-	7575	GATCCTTATCCAATAGGGTC	0	0	2	0	0	0	0	0	0	0	0	0	0
ath-MIR172b	-	5236	GATCAAATGGCTATGCC	0	0	1	3	0	0	0	0	0	7	2	18	4
ath-MIR172b	-	1310	GATCGTTTTTAGTTGTT	0	0	0	0	0	0	0	0	0	3	0	0	0
ath-MIR172b	-	8446	GATCAAGTGATGGAGGA	0	0	0	0	1	0	0	1	0	0	2	0	0
ath-MIR172b	-	3839	GATCCTTTTGCCTTGAT	4	4	0	0	0	0	0	0	0	0	0	0	0
ath-MIR172b	-	8886	GATCTTGACAGTGAAGT	0	0	0	0	0	0	0	1	0	0	0	0	0
ath-MIR172b	-	393	GATCGGCCAGTTCGGTC	9	1	2	3	3	0	0	14	4	1	1	1	0
ath-MIR172b	-	8235	GATCTCACCTTTGGTTC	0	0	0	0	0	0	0	0	3	0	0	0	0
ath-MIR172b	-	9539	GATCAATACAACTTTTA	0	0	0	1	0	32	0	0	0	0	0	0	0
ath-MIR172b	-	5236	GATCAAATGGCTATGCCCCA	0	0	1	3	0	0	0	0	0	8	3	22	4
ath-MIR172b	-	8235	GATCTCACCTTTGGTTCCTC	0	0	0	0	0	0	0	0	3	0	0	0	0
ath-MIR172b	-	8446	GATCAAGTGATGGAGGATGC	0	0	0	0	2	0	0	1	0	0	1	0	0
ath-MIR172b	-	9539	GATCAATACAACTTTTATTG	0	0	0	0	0	8	0	0	0	0	0	0	0
ath-MIR172b	-	393	GATCGGCCAGTTCGGTCACT	11	0	1	3	3	0	0	10	2	1	0	0	0
ath-MIR172b	-	1310	GATCGTTTTTAGTTGTTACC	0	0	0	0	0	0	0	0	0	2	0	0	0
ath-MIR172b	-	8886	GATCTTGACAGTGAAGTACA	0	0	0	0	0	0	0	2	0	0	0	0	0
ath-MIR775	+	9272	GATCAGTGTTATCGAAG	0	0	0	0	0	0	0	0	3	0	0	0	0
ath-MIR775	+	830	GATCTAATGAACCCATT	0	1	0	0	0	0	0	0	0	0	0	0	0
ath-MIR775	+	428	GATCATGCTCTCCCCAT	0	8	2	0	0	0	0	0	0	0	0	0	0
ath-MIR775	+	607	GATCAGTTCTCTCTTCT	0	4	1	0	9	0	0	0	0	0	2	2	0
ath-MIR775	+	9878	GATCCAAAAACAGAAGC	14	9	17	0	0	5	0	0	28	22	0	0	0
ath-MIR775	+	1422	GATCTTTCGGGTCGGGT	0	0	0	4	0	0	0	0	0	0	0	0	0
ath-MIR775	+	1446	GATCCGCCGAAGAAGAC	0	2	2	3	0	0	0	0	0	0	0	0	26
ath-MIR775	+	1213	GATCCGACACCTTGAAA	0	0	4	4	2	0	0	1	0	0	0	0	0
ath-MIR775	+	222	GATCTTCAAAACGATGA	2	3	2	0	10	3	0	0	0	0	0	0	0
ath-MIR775	+	9272	GATCAGTGTTATCGAAGGAC	0	0	0	0	0	0	0	0	3	0	0	0	0
ath-MIR775	+	830	GATCTAATGAACCCATTAAC	0	1	0	0	0	0	0	0	0	0	0	0	0
ath-MIR775	+	1213	GATCCGACACCTTGAAAACA	0	0	5	3	2	0	0	0	0	0	0	0	0
ath-MIR775	+	607	GATCAGTTCTCTCTTCTCTT	0	4	1	0	8	0	0	0	0	0	3	3	0
ath-MIR775	+	222	GATCTTCAAAACGATGACTA	2	3	2	0	12	3	0	0	0	0	0	0	0
ath-MIR775	+	1446	GATCCGCCGAAGAAGACTAG	0	2	2	3	0	0	0	0	0	0	0	0	40
ath-MIR775	+	428	GATCATGCTCTCCCCATATT	0	0	2	0	0	0	0	0	0	0	0	0	0
ath-MIR775	+	1422	GATCTTTCGGGTCGGGTCGT	0	0	0	5	0	0	0	0	0	0	0	0	0
ath-MIR775	+	9878	GATCCAAAAACAGAAGCCAA	17	8	10	0	2	7	0	0	22	32	0	0	0
ath-MIR159c	+	8448	GATCCAATAATCATCAC	1	0	0	0	2	0	0	0	0	0	0	0	0
ath-MIR159c	+	1398	GATCTTGGGTGGGCCTT	0	0	4	0	0	0	0	0	0	0	0	0	0
ath-MIR159c	+	3102	GATCGGACTCCATGAAC	11	79	65	35	0	18	0	0	37	3	66	0	1
ath-MIR159c	+	8403	GATCTTTCTTTTCAGGT	0	0	0	0	0	0	0	0	0	0	0	9	0
ath-MIR159c	+	8178	GATCTATAAATTTTCGG	77	0	0	0	19	3	0	0	0	24	0	13	0
ath-MIR159c	+	9202	GATCAGTGGTAGTCACA	0	2	1	0	0	0	0	1	0	0	13	0	9
ath-MIR159c	+	5650	GATCTTCTAAGTTTTGT	0	0	1	0	0	0	0	0	0	0	0	0	10
ath-MIR159c	+	7280	GATCTGGAGCTATACTC	0	3	0	0	3	0	0	0	0	0	0	0	0
ath-MIR159c	+	2915	GATCGTAGAGAGATTCT	0	0	2	0	0	0	0	0	0	0	0	0	0
ath-MIR159c	+	9842	GATCCTCTTCTTTCCAT	0	0	0	1	0	1	0	6	0	0	1	0	28
ath-MIR159c	+	7716	GATCTGAACTAAACCAA	0	0	0	3	0	0	0	0	0	0	0	0	0
ath-MIR159c	+	8448	GATCCAATAATCATCACGAA	1	0	0	0	0	0	0	0	0	0	0	0	0
ath-MIR159c	+	1398	GATCTTGGGTGGGCCTTCGG	0	0	4	0	0	0	0	0	0	0	0	0	0
ath-MIR159c	+	3102	GATCGGACTCCATGAACCGC	8	85	68	38	0	11	0	0	30	3	67	0	1
ath-MIR159c	+	7280	GATCTGGAGCTATACTCTCT	0	4	0	0	2	0	0	0	0	0	0	0	0
ath-MIR159c	+	8178	GATCTATAAATTTTCGGAGA	91	0	0	0	22	4	0	0	0	27	0	16	0
ath-MIR159c	+	7716	GATCTGAACTAAACCAACTT	0	0	0	3	0	0	0	0	0	0	0	0	0
ath-MIR159c	+	9202	GATCAGTGGTAGTCACAGCT	0	0	1	0	0	0	0	0	0	0	7	0	0
ath-MIR159c	+	9842	GATCCTCTTCTTTCCATCAG	0	0	0	1	0	1	0	7	0	0	1	0	42
ath-MIR159c	+	2915	GATCGTAGAGAGATTCTGGG	0	0	3	0	0	0	0	0	0	0	0	0	0
ath-MIR158a	-	8704	GATCCAAAATAACAAAC	4	0	0	0	0	0	0	0	0	0	0	0	0
ath-MIR158a	-	5805	GATCATGTCGGCGTCAA	0	0	1	0	0	6	0	0	0	0	0	0	0
ath-MIR158a	-	9031	GATCCTCAACGCTGTCA	0	0	0	0	0	0	0	0	0	0	0	0	1
ath-MIR158a	-	7985	GATCTTAGTTTGATGTC	11	8	5	7	0	8	0	0	0	12	0	15	0
ath-MIR158a	-	6688	GATCCGTTTCTTGTTGG	0	0	0	0	0	0	0	0	0	0	0	0	2
ath-MIR158a	-	1863	GATCCAAAACCAGCCGT	0	1	0	0	0	6	0	0	0	0	0	0	0
ath-MIR158a	-	4992	GATCAAAGAAGACAGTA	94	68	44	40	39	152	2	0	52	51	46	39	2
ath-MIR158a	-	7774	GATCTGAAAGTCCACGT	2	1	0	0	1	0	0	0	1	0	0	2	0
ath-MIR158a	-	3785	GATCTGTTCGAGCTAAA	0	2	1	2	1	0	0	0	0	0	0	0	0
ath-MIR158a	-	6035	GATCCACCGCGACGGGG	0	2	0	0	0	4	0	0	0	0	0	0	2
ath-MIR158a	-	7504	GATCGAGCGCCCCAAAG	0	0	0	2	0	0	1	0	0	0	0	0	0
ath-MIR158a	-	9062	GATCCTTACCGTTACGG	0	0	2	0	0	0	0	0	0	0	0	0	0
ath-MIR158a	-	4210	GATCGCACTTCACGCAA	0	3	0	0	0	0	0	2	0	0	0	0	3
ath-MIR158a	-	3050	GATCTTTTCCAAATGAT	0	0	0	0	1	0	0	0	7	0	0	0	0
ath-MIR158a	-	4032	GATCCTCTCATCCACTC	0	0	2	0	0	0	0	0	0	0	0	0	0
ath-MIR158a	-	5993	GATCCAACACCTACGAC	0	0	0	0	0	0	7	0	0	0	0	0	0
ath-MIR158a	-	2048	GATCAACCATGCTGGTG	0	0	0	0	0	0	0	0	2	0	0	0	0
ath-MIR158a	-	7504	GATCGAGCGCCCCAAAGGAT	0	0	0	3	0	0	1	0	0	0	0	0	0
ath-MIR158a	-	7985	GATCTTAGTTTGATGTCCGG	13	7	6	3	0	0	0	0	0	14	0	15	0
ath-MIR158a	-	9062	GATCCTTACCGTTACGGCAA	0	0	3	0	0	0	0	0	0	0	0	0	0
ath-MIR158a	-	5805	GATCATGTCGGCGTCAACGG	0	0	1	0	0	7	0	0	0	0	0	0	0
ath-MIR158a	-	4992	GATCAAAGAAGACAGTACTT	105	73	50	46	43	164	1	0	55	56	53	41	2
ath-MIR158a	-	6035	GATCCACCGCGACGGGGACT	0	0	0	0	1	4	0	0	0	0	0	0	3
ath-MIR158a	-	3050	GATCTTTTCCAAATGATGGC	0	0	0	0	1	0	0	0	8	0	0	0	0
ath-MIR158a	-	1863	GATCCAAAACCAGCCGTGAC	0	1	0	0	0	6	0	0	0	0	0	0	0
ath-MIR158a	-	5993	GATCCAACACCTACGACGTA	0	0	0	0	0	0	6	0	0	0	0	0	0
ath-MIR158a	-	4032	GATCCTCTCATCCACTCGAC	0	0	1	0	0	0	0	0	0	0	0	0	0
ath-MIR158a	-	8704	GATCCAAAATAACAAACACC	2	0	0	0	0	0	0	0	0	0	0	0	0
ath-MIR158a	-	9031	GATCCTCAACGCTGTCAAAT	0	0	0	0	0	0	0	0	0	0	0	0	1
ath-MIR158a	-	6688	GATCCGTTTCTTGTTGGAAA	0	0	0	0	0	0	0	0	0	0	0	0	2
ath-MIR158a	-	2048	GATCAACCATGCTGGTGCCG	0	0	0	0	2	0	0	0	0	0	0	0	0
ath-MIR158a	-	7774	GATCTGAAAGTCCACGTCAA	1	5	0	12	2	0	0	2	2	0	0	2	0
ath-MIR158a	-	3785	GATCTGTTCGAGCTAAAATG	0	2	1	3	2	0	0	0	0	0	0	0	0
ath-MIR158a	-	4210	GATCGCACTTCACGCAAAGG	0	3	0	0	0	0	0	2	0	0	0	0	0
ath-MIR843	+	2127	GATCCTCTCCAACCAAC	0	1	0	0	0	0	0	0	0	0	0	0	0
ath-MIR843	+	6174	GATCCAAAAACCCACCG	0	0	0	0	0	0	0	0	1	0	0	0	0
ath-MIR843	+	8590	GATCACCAACGCTTCTG	0	0	0	0	0	0	0	0	0	0	7	0	0
ath-MIR843	+	5071	GATCCATACGCTCTCTT	0	5	0	0	0	0	0	0	0	0	0	0	0
ath-MIR843	+	4512	GATCCAGACTTCGCATC	0	0	0	0	0	0	0	0	0	0	0	0	2
ath-MIR843	+	4335	GATCTTGTGGAGCCTGG	0	0	0	0	0	0	0	0	0	0	0	0	2
ath-MIR843	+	2359	GATCAAATTCAACTCTG	0	0	0	2	0	52	0	0	0	0	0	0	0
ath-MIR843	+	3181	GATCTCCGGTCTTAGAT	0	1	0	0	6	0	0	12	0	0	0	0	0
ath-MIR843	+	1840	GATCAAGGCCTCCAGAA	0	0	1	0	0	0	0	0	0	0	0	0	0
ath-MIR843	+	1018	GATCCTCCTTCGACGGT	0	0	2	0	0	0	0	0	0	0	0	0	2
ath-MIR843	+	6329	GATCCAGGAATACGAGA	0	0	1	0	0	0	0	0	0	0	0	0	0
ath-MIR843	+	9464	GATCTTGACTTAACAGA	3	34	18	27	22	43	8	3	24	3	34	1	5
ath-MIR843	+	1944	GATCTTTGGGAAGCCAA	0	0	0	0	0	0	0	0	0	0	2	0	0
ath-MIR843	+	2506	GATCCTCTGCTTCTTTA	0	0	0	0	2	0	0	0	0	0	0	0	0
ath-MIR843	+	1513	GATCACCTCTCTCAGGC	0	0	2	3	2	0	0	0	0	0	0	0	0
ath-MIR843	+	8936	GATCTTCCGCGTCCGGT	0	2	0	0	0	0	0	0	0	0	0	0	4
ath-MIR843	+	2164	GATCTTCAGGTGGAACA	0	2	0	0	0	0	0	0	0	0	0	0	1
ath-MIR843	+	5631	GATCAAGCGAATTATCC	0	0	0	1	0	3	0	0	0	0	0	0	0
ath-MIR843	+	5360	GATCAGTCAGCCACCAT	0	0	1	0	0	0	0	0	1	0	0	0	0
ath-MIR843	+	1944	GATCTTTGGGAAGCCAAATC	0	0	0	0	0	0	0	0	0	0	2	0	0
ath-MIR843	+	2164	GATCTTCAGGTGGAACAAAC	0	1	0	0	0	0	0	0	0	0	0	0	1
ath-MIR843	+	4335	GATCTTGTGGAGCCTGGCGA	0	0	0	0	0	0	0	0	0	0	0	0	2
ath-MIR843	+	2359	GATCAAATTCAACTCTGGCA	0	0	0	3	0	61	0	0	0	0	0	0	0
ath-MIR843	+	8590	GATCACCAACGCTTCTGCTA	0	0	0	0	0	0	0	0	0	0	5	0	0
ath-MIR843	+	1018	GATCCTCCTTCGACGGTACG	0	0	2	0	0	0	0	0	0	0	0	0	3
ath-MIR843	+	2127	GATCCTCTCCAACCAACAGC	0	1	0	0	0	0	0	0	0	0	0	0	0
ath-MIR843	+	1513	GATCACCTCTCTCAGGCATA	0	0	3	3	2	0	0	0	0	0	0	0	0
ath-MIR843	+	5631	GATCAAGCGAATTATCCCAA	0	0	0	2	0	2	0	0	0	0	0	0	0
ath-MIR843	+	3181	GATCTCCGGTCTTAGATTCA	0	0	0	0	6	0	0	9	0	0	0	0	0
ath-MIR843	+	5071	GATCCATACGCTCTCTTTTC	0	5	0	0	0	0	0	0	0	0	0	0	0
ath-MIR843	+	8936	GATCTTCCGCGTCCGGTGGA	0	3	0	0	0	0	0	0	0	0	0	0	5
ath-MIR843	+	2506	GATCCTCTGCTTCTTTAGGT	0	0	0	0	2	0	0	0	0	0	0	0	0
ath-MIR843	+	9464	GATCTTGACTTAACAGACTC	4	37	20	31	23	44	9	2	26	4	39	1	7
ath-MIR843	+	4512	GATCCAGACTTCGCATCCAT	0	0	0	0	0	0	0	0	0	0	0	0	3
ath-MIR843	+	1840	GATCAAGGCCTCCAGAAGAA	0	0	1	0	0	0	0	0	0	0	0	0	0
ath-MIR843	+	5360	GATCAGTCAGCCACCATAAG	0	0	0	0	0	0	0	0	1	0	0	0	0
ath-MIR156h	-	5870	GATCTGGAGCAATTTGA	0	1	0	0	0	0	0	0	0	0	0	2	0
ath-MIR156h	-	6492	GATCCAATCAACTTCTG	0	0	2	0	0	0	0	0	0	0	0	0	0
ath-MIR156h	-	3519	GATCAATGTTTTGTTGG	0	0	0	3	0	0	0	0	3	0	0	0	0
ath-MIR156h	-	4478	GATCATTCTCTTTCTGT	3	0	0	0	0	0	0	0	0	0	2	0	0
ath-MIR156h	-	2042	GATCTGGGTTTAAGTTT	0	0	0	0	0	0	0	0	0	0	0	1	0
ath-MIR156h	-	4478	GATCATTCTCTTTCTGTTCA	4	0	0	0	0	0	0	0	0	0	1	0	0
ath-MIR156h	-	6492	GATCCAATCAACTTCTGTAA	0	0	2	0	0	0	0	0	0	0	0	0	0
ath-MIR156h	-	5870	GATCTGGAGCAATTTGACTC	0	1	0	0	0	0	0	0	0	0	0	2	0
ath-MIR156h	-	3519	GATCAATGTTTTGTTGGGAA	0	0	0	3	0	0	0	0	4	0	0	0	0
ath-MIR853	+	2364	GATCAACGAGTTTCTTA	0	7	0	0	0	0	0	0	0	0	0	0	0
ath-MIR853	+	339	GATCTAAACATTTGTAC	13	2	0	0	0	0	14	0	3	67	4	56	0
ath-MIR853	+	2005	GATCTTCTAGGCCGTGC	0	0	0	0	2	0	5	0	0	0	0	0	0
ath-MIR853	+	8768	GATCAGTTTGTATTTTG	74	27	10	11	0	35	10	30	35	144	68	29	8
ath-MIR853	+	5804	GATCTGGAGTCTCTTGG	0	0	0	2	0	0	0	0	3	0	0	0	1
ath-MIR853	+	8800	GATCTTACCTCCCAAAT	4	0	0	0	0	0	0	0	0	0	0	0	0
ath-MIR853	+	2604	GATCACGGAAAGAGAGA	33	2	1	0	9	0	0	0	0	7	0	30	11
ath-MIR853	+	7156	GATCGGAGTTTGGAAGA	0	0	2	11	0	0	35	0	17	15	8	13	8
ath-MIR853	+	853	GATCACAATGTGTTTCC	0	0	0	1	0	0	0	0	0	0	0	0	0
ath-MIR853	+	8519	GATCGTTGCAATTCTAT	8	0	0	0	0	0	0	0	0	0	0	0	0
ath-MIR853	+	8800	GATCTTACCTCCCAAATCCC	2	0	0	0	0	0	0	0	0	0	0	0	0
ath-MIR853	+	8519	GATCGTTGCAATTCTATTGG	8	0	0	0	0	0	0	0	0	0	0	0	0
ath-MIR853	+	2005	GATCTTCTAGGCCGTGCAGG	0	0	0	0	2	0	5	0	0	0	0	0	0
ath-MIR853	+	2604	GATCACGGAAAGAGAGATTA	34	2	1	0	0	0	0	0	0	6	0	11	5
ath-MIR853	+	339	GATCTAAACATTTGTACTTT	16	2	0	0	0	0	14	0	2	69	5	66	0
ath-MIR853	+	5804	GATCTGGAGTCTCTTGGTTA	0	0	0	1	0	0	0	0	3	0	0	0	1
ath-MIR853	+	2364	GATCAACGAGTTTCTTAAAG	0	8	0	0	0	0	0	0	0	0	0	0	0
ath-MIR853	+	7156	GATCGGAGTTTGGAAGAATC	0	0	3	13	0	0	38	0	18	17	8	13	13
ath-MIR853	+	853	GATCACAATGTGTTTCCTTC	0	0	0	2	0	0	0	0	0	0	0	0	0
ath-MIR399e	+	8853	GATCTTAAGCACCTTGA	0	0	0	0	7	0	0	0	0	0	0	0	0
ath-MIR399e	+	4607	GATCTTGTGATTCTAAG	0	0	0	0	0	0	0	0	0	3	0	0	0
ath-MIR399e	+	6920	GATCGTTTATATTTTGC	0	0	0	0	0	0	0	0	0	0	0	9	0
ath-MIR399e	+	3874	GATCCAATGACGGGTGA	0	0	0	0	0	0	0	0	0	0	1	0	0
ath-MIR399e	+	6920	GATCGTTTATATTTTGCTAA	0	0	0	0	0	0	0	0	0	0	0	5	0
ath-MIR399f	+	7351	GATCTTAAGCACCTTGA	0	0	0	0	7	0	0	0	0	0	0	0	0
ath-MIR399f	+	3105	GATCTTGTGATTCTAAG	0	0	0	0	0	0	0	0	0	3	0	0	0
ath-MIR399f	+	5418	GATCGTTTATATTTTGC	0	0	0	0	0	0	0	0	0	0	0	9	0
ath-MIR399f	+	2372	GATCCAATGACGGGTGA	0	0	0	0	0	0	0	0	0	0	1	0	0
ath-MIR399f	+	5418	GATCGTTTATATTTTGCTAA	0	0	0	0	0	0	0	0	0	0	0	5	0
ath-MIR779	+	231	GATCTTGTATGTTTGTA	1	0	0	0	0	24	0	0	0	0	0	6	0
ath-MIR779	+	3344	GATCCGACTCCGATTAC	0	0	1	0	0	0	0	0	0	0	0	0	2
ath-MIR779	+	2474	GATCTATTCCAACAAAT	0	10	4	0	3	8	0	3	1	1	0	0	0
ath-MIR779	+	3587	GATCGCTTTTTTTTCCG	0	0	0	0	0	0	0	0	0	0	0	0	2
ath-MIR779	+	3046	GATCGCGTCTAAAACGC	0	0	0	1	0	0	0	0	0	0	0	0	0
ath-MIR779	+	231	GATCTTGTATGTTTGTATTG	0	0	0	0	0	29	0	0	0	0	0	5	0
ath-MIR779	+	2474	GATCTATTCCAACAAATGGG	6	11	4	2	1	0	0	5	3	2	0	0	0
ath-MIR779	+	3046	GATCGCGTCTAAAACGCTTT	0	0	0	1	0	0	0	0	0	0	0	0	0
ath-MIR5021	-	4819	GATCATACGTTTGTCTA	3	0	0	0	0	0	0	0	0	0	0	0	0
ath-MIR5021	-	6553	GATCAACGTCATATTAC	0	1	0	0	0	14	0	0	0	0	0	0	0
ath-MIR5021	-	4819	GATCATACGTTTGTCTAATC	4	0	0	0	0	0	0	0	0	0	0	0	0
ath-MIR5021	-	6553	GATCAACGTCATATTACATA	0	1	0	0	0	15	0	0	0	0	0	0	0
ath-MIR447c	-	9831	GATCGTCTTCCGAGAGC	0	2	0	0	0	0	0	0	1	0	0	0	2
ath-MIR447c	-	3448	GATCGGAGAGAAGCGAA	0	0	0	0	0	0	0	0	0	0	0	0	8
ath-MIR447c	-	9273	GATCAATAAAACACACA	0	0	0	0	0	0	0	0	0	0	1	0	0
ath-MIR447c	-	9025	GATCGATTTTATTATAC	1	0	0	0	0	0	0	0	0	0	0	0	0
ath-MIR447c	-	5923	GATCAAGCTCTGCTCAT	49	50	19	53	22	18	8	25	3	13	53	31	8
ath-MIR447c	-	4610	GATCTGTCGCTACATGC	3	13	4	0	0	0	0	0	0	0	0	5	0
ath-MIR447c	-	6833	GATCAGAACAGACCGCA	6	19	1	0	0	0	0	0	0	3	2	17	0
ath-MIR447c	-	3164	GATCTGATATTGGTCCT	0	0	1	0	0	0	0	0	0	0	0	0	0
ath-MIR447c	-	5572	GATCGCGACCCTCATGT	0	0	2	0	0	0	0	0	0	0	0	0	0
ath-MIR447c	-	3421	GATCAGAGGATGGATTC	0	0	2	3	0	0	0	0	0	0	0	0	0
ath-MIR447c	-	3004	GATCTCGGTGTTTCTCG	0	0	2	0	0	0	0	0	0	0	0	0	0
ath-MIR447c	-	9919	GATCCTCTCCTTTTCCC	0	0	11	0	0	0	0	0	0	0	0	0	0
ath-MIR447c	-	6153	GATCATTTGTTGTTCGT	16	2	1	3	2	0	1	0	1	15	2	1	0
ath-MIR447c	-	7493	GATCGGTAGCCGAACAC	0	0	0	0	0	0	0	0	0	0	0	3	0
ath-MIR447c	-	3004	GATCTCGGTGTTTCTCGTTT	0	0	3	0	0	0	0	0	0	0	0	0	0
ath-MIR447c	-	3164	GATCTGATATTGGTCCTGCT	0	0	1	0	0	0	0	0	0	0	0	0	0
ath-MIR447c	-	5572	GATCGCGACCCTCATGTCAC	0	0	2	0	0	0	0	0	0	0	0	0	0
ath-MIR447c	-	4610	GATCTGTCGCTACATGCCAG	2	7	2	0	0	0	0	0	0	0	0	4	0
ath-MIR447c	-	3448	GATCGGAGAGAAGCGAAGCT	0	0	0	0	0	0	0	0	0	0	0	0	8
ath-MIR447c	-	6833	GATCAGAACAGACCGCACTA	0	20	1	0	0	0	0	0	0	3	0	18	0
ath-MIR447c	-	9919	GATCCTCTCCTTTTCCCCGC	0	0	12	0	0	0	0	0	0	0	0	0	0
ath-MIR447c	-	9831	GATCGTCTTCCGAGAGCCAA	0	2	0	0	0	0	0	0	1	0	0	0	0
ath-MIR447c	-	3421	GATCAGAGGATGGATTCGAG	0	0	3	3	0	0	0	0	0	0	0	0	0
ath-MIR447c	-	6153	GATCATTTGTTGTTCGTTTC	15	0	0	3	2	0	1	0	1	17	2	1	0
ath-MIR447c	-	5923	GATCAAGCTCTGCTCATAGC	44	53	18	59	20	15	4	21	2	13	55	29	7
ath-MIR157a	-	241	GATCCGACTGAAAGGAT	0	0	0	0	0	48	0	0	4	7	6	1	1
ath-MIR157a	-	7186	GATCAGCTCTTTGGTCC	0	0	0	0	2	0	0	0	0	0	0	0	0
ath-MIR157a	-	9224	GATCCTGTGACTAAACC	3	5	0	0	0	0	0	0	0	0	3	0	0
ath-MIR157a	-	674	GATCGAATACAACACTC	0	0	0	0	0	0	4	0	12	3	1	0	4
ath-MIR157a	-	9224	GATCCTGTGACTAAACCAGC	3	5	0	0	0	0	0	0	0	0	4	0	0
ath-MIR157a	-	674	GATCGAATACAACACTCCCC	0	0	0	0	0	0	2	0	12	4	1	0	5
ath-MIR157a	-	241	GATCCGACTGAAAGGATATG	0	0	0	0	0	56	0	0	4	8	6	1	1
ath-MIR171b	-	8953	GATCTGATGCAGAAACC	0	0	0	0	0	0	0	0	0	0	9	0	0
ath-MIR171b	-	3209	GATCAAAACAAACACAA	0	0	10	24	58	83	21	1	0	0	0	0	0
ath-MIR171b	-	5249	GATCTGGAGCTGAACCT	0	0	2	0	0	0	0	0	0	0	0	0	0
ath-MIR171b	-	8301	GATCCAGGTCTTTTCCA	0	0	0	1	0	0	0	0	0	0	0	0	0
ath-MIR171b	-	7760	GATCAACATCCTTTAAC	0	2	0	0	0	0	0	0	0	0	0	0	0
ath-MIR171b	-	117	GATCGGTAGCCTTAGAG	0	2	3	0	0	0	0	0	0	3	2	0	0
ath-MIR171b	-	117	GATCGGTAGCCTTAGAGGGG	0	2	0	0	0	0	0	0	0	3	0	0	0
ath-MIR171b	-	8301	GATCCAGGTCTTTTCCAATC	0	0	0	2	0	0	0	0	0	0	0	0	0
ath-MIR171b	-	8953	GATCTGATGCAGAAACCCAT	0	0	0	0	0	0	0	0	0	0	11	0	0
ath-MIR171b	-	7760	GATCAACATCCTTTAACTCA	0	2	0	0	0	0	0	0	0	0	0	0	0
ath-MIR171b	-	5249	GATCTGGAGCTGAACCTAAT	0	0	3	0	0	0	0	0	0	0	0	0	0
ath-MIR3434	-	9597	GATCCACTCCAAAATAC	0	0	4	0	0	0	0	0	0	0	0	0	0
ath-MIR3434	-	3179	GATCCAGGAGCTATGCT	133	31	77	74	57	186	33	100	52	137	213	103	48
ath-MIR3434	-	1030	GATCTCTCTCACATCCC	0	0	2	0	0	0	0	0	3	0	0	0	0
ath-MIR3434	-	2170	GATCCCAGCAACCTTAA	0	0	2	0	0	0	0	0	0	0	0	0	0
ath-MIR3434	-	6732	GATCAGGACACTGGGTG	0	0	2	0	0	0	0	0	0	0	0	0	0
ath-MIR3434	-	3102	GATCTCGAGCTTTAGTT	0	1	0	0	0	0	0	0	0	0	0	0	0
ath-MIR3434	-	1843	GATCTGTCTCCAGTACC	0	0	2	0	0	0	0	0	0	0	0	0	2
ath-MIR3434	-	2654	GATCCAAACCCTAATAA	0	0	0	1	0	0	0	0	0	0	0	0	0
ath-MIR3434	-	355	GATCCAGAACTGCAAAA	0	0	0	0	3	0	0	0	0	0	0	0	8
ath-MIR3434	-	2946	GATCCTACCCTTACATT	0	0	0	0	1	0	0	0	0	0	0	0	0
ath-MIR3434	-	1089	GATCTCCTTAGTGACCT	0	0	0	0	0	0	0	0	0	0	0	0	21
ath-MIR3434	-	1089	GATCTCCTTAGTGACCTACT	0	0	0	0	0	0	0	0	0	0	0	0	31
ath-MIR3434	-	355	GATCCAGAACTGCAAAAAAA	0	0	0	0	3	0	0	0	0	0	0	0	6
ath-MIR3434	-	1030	GATCTCTCTCACATCCCAAT	0	0	2	0	0	0	0	0	3	0	0	0	0
ath-MIR3434	-	3179	GATCCAGGAGCTATGCTCGC	40	8	44	25	28	90	4	36	21	55	103	34	43
ath-MIR3434	-	2170	GATCCCAGCAACCTTAAATA	0	0	2	0	0	0	0	0	0	0	0	0	0
ath-MIR3434	-	1843	GATCTGTCTCCAGTACCTGA	0	0	3	0	0	0	0	0	0	0	0	0	0
ath-MIR3434	-	2654	GATCCAAACCCTAATAATCT	0	0	0	1	0	0	0	0	0	0	0	0	0
ath-MIR3434	-	6732	GATCAGGACACTGGGTGTTG	0	0	3	0	0	0	0	0	0	0	0	0	0
ath-MIR3434	-	9597	GATCCACTCCAAAATACACT	0	0	5	0	0	0	0	0	0	0	0	0	0
ath-MIR771	-	4810	GATCCTGATAATTCTCC	0	0	1	0	0	0	0	0	0	0	0	0	0
ath-MIR771	-	9569	GATCTTGATTCGGTGTC	0	0	2	5	0	0	0	0	0	1	0	3	12
ath-MIR771	-	7082	GATCTTAACCACAGATG	0	0	0	0	3	0	0	2	0	0	4	1	0
ath-MIR771	-	1934	GATCTTCGAAATGATTT	0	0	0	0	3	0	0	0	0	0	0	0	0
ath-MIR771	-	9159	GATCAATGTGAACTTGA	0	0	0	0	0	0	0	4	0	0	0	0	6
ath-MIR771	-	3799	GATCCCAACCATGAGTG	0	0	0	0	0	1	0	0	0	0	0	0	0
ath-MIR771	-	158	GATCTCGATAAGTTCTG	0	0	0	2	0	0	0	0	0	0	0	0	0
ath-MIR771	-	8129	GATCCTACCAACAGTTG	0	1	4	1	22	0	8	15	1	2	0	0	10
ath-MIR771	-	1934	GATCTTCGAAATGATTTACA	0	0	0	0	1	0	0	0	0	0	0	0	0
ath-MIR771	-	3799	GATCCCAACCATGAGTGAGT	0	0	0	0	0	1	0	0	0	0	0	0	0
ath-MIR771	-	9159	GATCAATGTGAACTTGAGAG	0	0	0	0	0	0	0	4	0	0	0	0	8
ath-MIR771	-	7082	GATCTTAACCACAGATGCAT	0	0	0	0	0	0	0	2	0	0	0	1	0
ath-MIR771	-	4810	GATCCTGATAATTCTCCGGA	0	0	1	0	0	0	0	0	0	0	0	0	0
ath-MIR771	-	9569	GATCTTGATTCGGTGTCAAA	0	0	2	7	0	0	0	0	0	2	0	3	18
ath-MIR771	-	8129	GATCCTACCAACAGTTGATA	0	1	3	2	25	0	1	17	1	2	0	0	12
ath-MIR851	-	5041	GATCCTGATAATTCTCC	0	0	1	0	0	0	0	0	0	0	0	0	0
ath-MIR851	-	9800	GATCTTGATTCGGTGTC	0	0	2	5	0	0	0	0	0	1	0	3	12
ath-MIR851	-	7313	GATCTTAACCACAGATG	0	0	0	0	3	0	0	2	0	0	4	1	0
ath-MIR851	-	2165	GATCTTCGAAATGATTT	0	0	0	0	3	0	0	0	0	0	0	0	0
ath-MIR851	-	9390	GATCAATGTGAACTTGA	0	0	0	0	0	0	0	4	0	0	0	0	6
ath-MIR851	-	4030	GATCCCAACCATGAGTG	0	0	0	0	0	1	0	0	0	0	0	0	0
ath-MIR851	-	389	GATCTCGATAAGTTCTG	0	0	0	2	0	0	0	0	0	0	0	0	0
ath-MIR851	-	8360	GATCCTACCAACAGTTG	0	1	4	1	22	0	8	15	1	2	0	0	10
ath-MIR851	-	2165	GATCTTCGAAATGATTTACA	0	0	0	0	1	0	0	0	0	0	0	0	0
ath-MIR851	-	4030	GATCCCAACCATGAGTGAGT	0	0	0	0	0	1	0	0	0	0	0	0	0
ath-MIR851	-	9390	GATCAATGTGAACTTGAGAG	0	0	0	0	0	0	0	4	0	0	0	0	8
ath-MIR851	-	7313	GATCTTAACCACAGATGCAT	0	0	0	0	0	0	0	2	0	0	0	1	0
ath-MIR851	-	5041	GATCCTGATAATTCTCCGGA	0	0	1	0	0	0	0	0	0	0	0	0	0
ath-MIR851	-	9800	GATCTTGATTCGGTGTCAAA	0	0	2	7	0	0	0	0	0	2	0	3	18
ath-MIR851	-	8360	GATCCTACCAACAGTTGATA	0	1	3	2	25	0	1	17	1	2	0	0	12
ath-MIR2111b	+	3586	GATCTGGTGGCTACCAC	0	0	0	1	0	0	0	0	1	0	0	0	2
ath-MIR2111b	+	801	GATCTCTCTCTCTCTTT	0	0	0	1	0	0	0	0	2	0	17	44	0
ath-MIR2111b	+	545	GATCGATTCTATTGAGA	0	0	0	0	0	0	0	0	3	0	0	0	0
ath-MIR2111b	+	7734	GATCAAAAGATGTGAGT	0	0	0	5	0	0	0	0	7	0	0	1	0
ath-MIR2111b	+	2826	GATCTCCAAGTACCTGT	0	0	0	0	0	2	0	0	0	0	0	0	0
ath-MIR2111b	+	7406	GATCCGCTGGGTCACTG	0	0	0	0	0	0	0	0	0	0	5	0	0
ath-MIR2111b	+	3022	GATCGATAAACTATCAA	0	0	0	1	0	6	0	0	0	0	0	0	0
ath-MIR2111b	+	7507	GATCCCCGCAGGTTGGA	0	0	0	0	1	0	0	0	0	0	0	0	0
ath-MIR2111b	+	2055	GATCGTGTTCTGCTGAG	0	4	0	0	0	0	0	0	0	0	8	0	0
ath-MIR2111b	+	2179	GATCATCTGTTTTTTCT	41	8	3	5	8	0	0	32	13	35	11	66	0
ath-MIR2111b	+	3144	GATCTTCATCGTCTTCT	0	0	0	1	0	0	0	0	0	0	17	0	5
ath-MIR2111b	+	5238	GATCTTGATATGATATC	0	0	2	0	0	0	0	0	0	3	0	0	0
ath-MIR2111b	+	3529	GATCGCACTTTCCGTCG	0	0	0	0	1	0	0	0	0	0	0	0	0
ath-MIR2111b	+	3650	GATCTACCCGCACGGAA	0	4	0	3	8	0	10	0	0	0	0	8	0
ath-MIR2111b	+	3586	GATCTGGTGGCTACCACGAA	0	0	0	2	0	0	0	0	1	0	0	0	3
ath-MIR2111b	+	7406	GATCCGCTGGGTCACTGAGT	0	0	0	0	0	0	0	0	0	0	6	0	0
ath-MIR2111b	+	2179	GATCATCTGTTTTTTCTTTG	43	9	4	7	10	0	0	34	13	35	12	78	0
ath-MIR2111b	+	3529	GATCGCACTTTCCGTCGAAA	0	0	0	0	1	0	0	0	0	0	0	0	0
ath-MIR2111b	+	3144	GATCTTCATCGTCTTCTTCA	0	0	0	2	0	0	0	0	0	0	17	0	7
ath-MIR2111b	+	3650	GATCTACCCGCACGGAAAGC	0	4	0	3	9	0	12	0	0	0	0	8	0
ath-MIR2111b	+	2826	GATCTCCAAGTACCTGTGGA	0	0	0	0	0	2	0	0	0	0	0	0	0
ath-MIR2111b	+	5238	GATCTTGATATGATATCAAA	0	0	2	0	0	0	0	0	0	3	0	0	0
ath-MIR2111b	+	3022	GATCGATAAACTATCAATCA	0	0	0	1	0	5	0	0	0	0	0	0	0
ath-MIR2111b	+	2055	GATCGTGTTCTGCTGAGGAC	0	4	0	0	0	0	0	0	0	0	10	0	0
ath-MIR2111b	+	801	GATCTCTCTCTCTCTTTCTT	0	0	0	0	0	0	0	0	0	0	0	9	0
ath-MIR2111b	+	7507	GATCCCCGCAGGTTGGACCC	0	0	0	0	1	0	0	0	0	0	0	0	0
ath-MIR2111b	+	7734	GATCAAAAGATGTGAGTAAA	0	0	0	6	0	0	0	0	5	0	0	1	0
ath-MIR5016	+	5934	GATCTTATTTTGGAATC	0	0	0	1	0	0	0	0	0	0	0	0	0
ath-MIR5016	+	3629	GATCCTCTCTCTTCTTT	0	0	0	0	0	0	0	0	0	3	0	0	0
ath-MIR5016	+	5883	GATCATAATCATTCTCT	0	3	0	0	0	0	0	0	0	0	0	0	2
ath-MIR5016	+	6000	GATCCTTACTTAGTGAA	104	33	10	28	10	35	1	39	22	215	10	136	0
ath-MIR5016	+	5910	GATCTCGCCGGAGCCGC	0	0	0	0	0	0	0	2	0	0	0	0	0
ath-MIR5016	+	5184	GATCCGAAAAGGTTCGT	0	0	0	0	0	0	0	0	27	0	0	0	0
ath-MIR5016	+	3629	GATCCTCTCTCTTCTTTTTC	0	0	0	0	0	0	0	0	0	3	0	0	0
ath-MIR5016	+	5883	GATCATAATCATTCTCTCTC	0	4	0	0	0	0	0	0	0	0	0	0	3
ath-MIR5016	+	5184	GATCCGAAAAGGTTCGTTTT	0	0	0	0	0	0	0	0	26	0	0	0	0
ath-MIR5016	+	5910	GATCTCGCCGGAGCCGCCGT	0	0	0	0	0	0	0	2	0	0	0	0	0
ath-MIR5016	+	5934	GATCTTATTTTGGAATCGTC	0	0	0	1	0	0	0	0	0	0	0	0	0
ath-MIR5016	+	6000	GATCCTTACTTAGTGAAGTA	118	38	9	33	13	42	2	43	25	242	10	158	0
ath-MIR402	+	9924	GATCGAGCAAAACAGAG	0	0	0	0	1	0	5	0	0	0	0	0	0
ath-MIR402	+	1449	GATCTGTCTTTGACTTC	0	0	0	3	0	0	0	0	0	0	0	0	0
ath-MIR402	+	932	GATCTTAAAAGTGCAAA	0	0	1	0	0	0	0	0	0	0	0	0	0
ath-MIR402	+	7463	GATCATAGGTTCTTGGG	0	0	0	0	0	2	0	0	0	0	0	0	0
ath-MIR402	+	9535	GATCGAATCCGCCGATT	0	0	1	0	0	0	0	0	1	0	0	0	0
ath-MIR402	+	1961	GATCAAGTTGAAAATAG	0	0	0	0	0	0	0	0	0	0	0	0	2
ath-MIR402	+	578	GATCCATCGTGGGCTGA	0	0	2	0	0	0	0	0	0	0	0	0	0
ath-MIR402	+	4948	GATCCGTTGAAAAGAGC	0	2	0	0	0	0	0	0	0	0	0	0	0
ath-MIR402	+	2142	GATCTGTGGCTATGCACCAC	1	14	0	0	0	2	0	1	0	0	0	0	0
ath-MIR402	+	9535	GATCGAATCCGCCGATTTCG	0	0	1	0	0	0	0	0	1	0	0	0	0
ath-MIR402	+	4948	GATCCGTTGAAAAGAGCAGA	0	2	0	0	0	0	0	0	0	0	0	0	0
ath-MIR402	+	1961	GATCAAGTTGAAAATAGTCG	0	0	0	0	0	0	0	0	0	0	0	0	2
ath-MIR402	+	7463	GATCATAGGTTCTTGGGTAG	0	0	0	0	0	2	0	0	0	0	0	0	0
ath-MIR402	+	1449	GATCTGTCTTTGACTTCCAA	0	0	0	2	0	0	0	0	0	0	0	0	0
ath-MIR402	+	9924	GATCGAGCAAAACAGAGAGA	0	0	0	0	2	0	4	0	0	0	0	0	0
ath-MIR156c	-	7060	GATCTCGATGATAACAC	0	1	2	0	0	0	0	0	0	0	0	0	0
ath-MIR156c	-	3471	GATCATCACAAGTATCT	0	0	0	0	0	0	0	0	1	8	0	23	0
ath-MIR156c	-	9177	GATCAGAGCGTTAAATG	0	0	0	1	0	0	0	0	0	0	0	0	0
ath-MIR156c	-	8766	GATCTAGTATTTTGGTT	285	12	9	8	10	25	14	45	10	102	9	90	0
ath-MIR156c	-	1965	GATCTATTTAATTGATT	0	0	0	0	0	0	0	0	0	18	0	0	0
ath-MIR156c	-	6110	GATCTTTAAGAAAATAT	0	0	0	0	0	0	0	0	0	0	0	1	0
ath-MIR156c	-	9177	GATCAGAGCGTTAAATGTAA	0	0	0	2	0	0	0	0	0	0	0	0	0
ath-MIR156c	-	8766	GATCTAGTATTTTGGTTCAG	305	6	8	10	10	24	10	37	9	107	12	96	0
ath-MIR156c	-	7060	GATCTCGATGATAACACTTC	0	1	2	0	0	0	0	0	0	0	0	0	0
ath-MIR156c	-	3471	GATCATCACAAGTATCTAGA	0	0	0	0	0	0	0	0	0	2	0	12	0
ath-MIR156c	-	1965	GATCTATTTAATTGATTTCG	0	0	0	0	0	0	0	0	0	20	0	0	0
ath-MIR166e	-	6116	GATCACAAGATTCCACC	0	1	0	0	0	0	0	0	0	0	0	0	0
ath-MIR166e	-	1680	GATCTTTAGGCAACATC	0	0	0	0	0	0	0	0	0	0	0	2	0
ath-MIR166e	-	13	GATCTTTCCTTCTTTGA	0	0	0	0	0	0	0	0	3	0	0	0	0
ath-MIR166e	-	880	GATCTTTCTAACTTTTA	0	0	0	0	0	0	0	0	0	3	0	0	0
ath-MIR166e	-	13	GATCTTTCCTTCTTTGAGTA	0	0	0	0	0	0	0	0	3	0	0	0	0
ath-MIR166e	-	6116	GATCACAAGATTCCACCACA	0	1	0	0	0	0	0	0	0	0	0	0	0
ath-MIR166e	-	1680	GATCTTTAGGCAACATCCAA	0	0	0	0	0	0	0	0	0	0	0	1	0
ath-MIR166e	-	880	GATCTTTCTAACTTTTATAA	0	0	0	0	0	0	0	0	0	2	0	0	0
ath-MIR157b	+	8880	GATCAACTAATAAACTC	6	0	0	2	5	2	0	0	1	20	0	0	2
ath-MIR157b	+	6431	GATCAGTAAGTGAGTGA	0	0	0	0	0	0	0	0	0	0	0	0	2
ath-MIR157b	+	5020	GATCATTGACATGGACT	0	1	0	0	0	0	0	0	0	0	15	42	0
ath-MIR157b	+	6431	GATCAGTAAGTGAGTGACGG	0	0	0	0	0	0	0	0	0	0	0	0	1
ath-MIR157b	+	5020	GATCATTGACATGGACTCCT	0	1	0	0	0	0	0	0	0	0	14	47	0
ath-MIR157b	+	8880	GATCAACTAATAAACTCTGG	6	0	0	3	6	2	0	0	1	21	0	0	0
ath-MIR399d	-	4253	GATCCCAATGCCTTGCC	0	0	2	0	0	0	0	0	0	0	0	0	18
ath-MIR399d	-	5868	GATCCATTGGTGGGTGA	0	0	0	0	0	0	0	0	0	3	0	0	0
ath-MIR399d	-	5366	GATCTTCGATACGGGTC	0	0	0	0	0	0	0	0	0	0	0	0	7
ath-MIR399d	-	3435	GATCCTAATGGGTGGTG	0	0	0	2	0	0	0	0	0	0	0	0	0
ath-MIR399d	-	5907	GATCCATGATTCTAAAG	0	0	0	0	0	56	0	0	0	0	0	0	0
ath-MIR399d	-	3435	GATCCTAATGGGTGGTGGTT	0	0	0	2	0	0	0	0	0	0	0	0	0
ath-MIR399d	-	4253	GATCCCAATGCCTTGCCAGC	0	0	2	0	0	0	0	0	0	0	0	0	26
ath-MIR399d	-	5366	GATCTTCGATACGGGTCAAA	0	0	0	0	0	0	0	0	0	0	0	0	4
ath-MIR399d	-	5907	GATCCATGATTCTAAAGTCT	0	0	0	0	0	68	0	0	0	0	0	0	0
ath-MIR3932a	+	2509	GATCTGTGATGAAAGTA	0	0	0	0	0	0	0	18	1	5	0	2	0
ath-MIR3932a	+	1681	GATCTCCAAGCGTATGA	0	0	0	0	0	0	0	2	12	37	0	0	0
ath-MIR3932a	+	9728	GATCTGTCATGGGAAAT	17	0	0	1	0	0	0	0	4	13	12	9	10
ath-MIR3932a	+	2722	GATCTGAGACTTCTATT	0	0	0	0	0	0	0	0	0	6	0	13	0
ath-MIR3932a	+	5684	GATCCAAAAACCCTAAA	0	0	0	0	0	0	0	0	2	0	0	0	0
ath-MIR3932a	+	2146	GATCCATTGTTGAAGAT	0	8	0	3	0	1	0	0	4	5	8	0	107
ath-MIR3932a	+	2146	GATCCATTGTTGAAGATGAA	0	0	0	0	0	0	0	0	4	0	0	0	0
ath-MIR3932a	+	2722	GATCTGAGACTTCTATTGAT	0	0	0	0	0	0	0	0	0	7	0	15	0
ath-MIR3932a	+	2509	GATCTGTGATGAAAGTAGAC	0	0	0	0	0	0	0	19	1	5	0	3	0
ath-MIR3932a	+	9728	GATCTGTCATGGGAAATTAG	21	0	0	0	0	0	0	0	4	14	13	10	0
ath-MIR3932b	-	3373	GATCTGTGATGAAAGTA	0	0	0	0	0	0	0	18	1	5	0	2	0
ath-MIR3932b	-	1424	GATCTTTCAATATCTTG	0	0	0	0	1	0	0	0	0	0	0	0	0
ath-MIR3932b	-	2607	GATCTCCAAGCGTATGA	0	0	0	0	0	0	0	2	12	37	0	0	0
ath-MIR3932b	-	9919	GATCCGTAAAAACAATG	0	0	0	0	0	0	0	0	0	9	0	0	0
ath-MIR3932b	-	5466	GATCCATTTATCAAAGT	0	0	0	0	0	0	0	0	0	1	0	0	0
ath-MIR3932b	-	8585	GATCTTATGACGACGAA	0	0	0	0	0	0	7	0	0	4	0	0	0
ath-MIR3932b	-	8585	GATCTTATGACGACGAAGAC	0	0	0	0	0	0	7	0	0	5	0	0	0
ath-MIR3932b	-	2607	GATCTCCAAGCGTATGAAGT	0	0	0	0	0	0	0	2	14	43	0	0	0
ath-MIR3932b	-	5466	GATCCATTTATCAAAGTAAC	0	0	0	0	0	0	0	0	0	2	0	0	0
ath-MIR3932b	-	3373	GATCTGTGATGAAAGTAGAC	0	0	0	0	0	0	0	19	1	5	0	3	0
ath-MIR3932b	-	9919	GATCCGTAAAAACAATGGTT	0	0	0	0	0	0	0	0	0	10	0	0	0
ath-MIR157d	-	1244	GATCTTTAGCTTCGTCT	0	0	0	0	0	0	0	0	0	0	0	1	0
ath-MIR157d	-	9373	GATCTTCGTTGGTTCCT	0	0	0	0	0	0	0	7	0	0	1	0	0
ath-MIR157d	-	9373	GATCTTCGTTGGTTCCTCTT	0	0	0	0	0	0	0	7	0	0	1	0	0
ath-MIR870	-	5080	GATCAACTTTGTAATGC	0	0	0	0	0	1	1	0	3	15	0	0	0
ath-MIR870	-	9312	GATCTATGGGTTTTGTG	0	0	0	0	0	0	0	0	0	3	0	0	0
ath-MIR870	-	3789	GATCAAATGGTTCCTAA	0	0	0	0	3	0	0	0	0	0	18	57	0
ath-MIR870	-	9496	GATCCTTTATTGTAATT	0	0	0	0	0	0	0	0	0	6	0	0	0
ath-MIR870	-	4386	GATCTTGAAAGTACTCG	0	11	0	0	0	29	16	0	0	0	0	0	14
ath-MIR870	-	9312	GATCTATGGGTTTTGTGTTT	0	0	0	0	0	0	0	0	0	2	0	0	0
ath-MIR870	-	5080	GATCAACTTTGTAATGCAGA	0	0	0	0	0	1	1	0	4	17	0	0	0
ath-MIR870	-	4386	GATCTTGAAAGTACTCGAAG	0	0	0	0	0	8	7	0	0	0	0	0	7
ath-MIR870	-	9496	GATCCTTTATTGTAATTTCT	0	0	0	0	0	0	0	0	0	3	0	0	0
ath-MIR870	-	3789	GATCAAATGGTTCCTAAAAT	0	0	0	0	3	0	0	0	0	0	20	63	0
ath-MIR394b	+	8714	GATCAGGATTAGAGCTC	0	0	0	0	0	0	0	0	0	1	0	0	2
ath-MIR394b	+	5874	GATCGGTATTCGTTCAT	96	105	28	48	40	70	46	72	83	89	70	128	12
ath-MIR394b	+	9131	GATCGTTACAAACTGAT	0	1	4	6	0	0	0	2	0	5	5	0	6
ath-MIR394b	+	220	GATCAAGACTAATCCGA	0	0	0	0	0	0	0	0	0	1	0	0	0
ath-MIR394b	+	757	GATCTAAGCTCAGTATT	0	0	0	0	0	3	0	0	0	0	0	0	0
ath-MIR394b	+	4684	GATCACACCCATGTTTG	0	1	0	1	0	0	0	0	0	0	0	0	1
ath-MIR394b	+	2915	GATCATCCTCGTTACGA	0	0	0	1	0	0	0	0	0	0	0	0	0
ath-MIR394b	+	5510	GATCACGATGACAGAGT	2	1	1	0	0	0	0	0	22	1	0	2	0
ath-MIR394b	+	3131	GATCCGAACACTCTTAG	0	2	2	0	0	0	0	0	0	0	0	0	0
ath-MIR394b	+	9428	GATCTTAGATTCCACAT	0	2	0	3	0	8	0	0	0	0	0	0	3
ath-MIR394b	+	2798	GATCCTGATGCTGAAGA	0	0	0	0	0	0	0	0	2	0	0	0	0
ath-MIR394b	+	5510	GATCACGATGACAGAGTTGT	0	1	1	0	0	0	0	0	25	2	0	0	0
ath-MIR394b	+	9428	GATCTTAGATTCCACATTCC	0	2	0	0	0	10	0	0	0	0	0	0	0
ath-MIR394b	+	9131	GATCGTTACAAACTGATATA	0	1	4	8	0	0	0	2	0	4	5	0	10
ath-MIR394b	+	2915	GATCATCCTCGTTACGATTC	0	0	0	1	0	0	0	0	0	0	0	0	0
ath-MIR394b	+	8714	GATCAGGATTAGAGCTCAGC	0	0	0	0	0	0	0	0	0	2	0	0	3
ath-MIR394b	+	220	GATCAAGACTAATCCGATTG	0	0	0	0	0	0	0	0	0	1	0	0	0
ath-MIR394b	+	2798	GATCCTGATGCTGAAGAAGT	0	1	0	0	0	0	0	0	1	0	0	0	0
ath-MIR394b	+	3131	GATCCGAACACTCTTAGTGA	0	2	1	0	0	0	0	0	0	0	0	0	0
ath-MIR394b	+	5874	GATCGGTATTCGTTCATGGC	105	114	28	54	39	74	45	80	91	93	75	144	15
ath-MIR394b	+	4684	GATCACACCCATGTTTGCTC	0	1	0	1	0	0	0	0	0	0	0	0	1
ath-MIR394b	+	757	GATCTAAGCTCAGTATTTTC	0	0	0	0	0	4	0	0	0	0	0	0	0
ath-MIR319c	+	6097	GATCAAGCCAACCAACG	0	0	0	0	0	0	0	0	1	0	0	0	0
ath-MIR319c	+	6722	GATCATGCCAAAAAAAA	0	3	0	3	0	0	0	0	0	0	0	0	0
ath-MIR319c	+	4848	GATCAATGGAAATGGGG	0	0	1	0	0	0	0	0	0	0	0	0	2
ath-MIR319c	+	6200	GATCTTCCCCATGGATT	2	0	0	3	0	0	0	0	0	0	0	0	0
ath-MIR319c	+	4368	GATCCCGTGAACGGAGG	0	3	9	1	6	0	0	0	3	18	12	2	2
ath-MIR319c	+	4368	GATCCCGTGAACGGAGGAGA	0	3	9	2	7	0	0	0	3	21	14	2	2
ath-MIR319c	+	6200	GATCTTCCCCATGGATTTGG	2	0	0	3	0	0	0	0	0	0	0	0	0
ath-MIR319c	+	4848	GATCAATGGAAATGGGGACA	0	0	0	0	0	0	0	0	0	0	0	0	3
ath-MIR319c	+	6097	GATCAAGCCAACCAACGGCG	0	0	0	0	0	0	0	0	1	0	0	0	0
ath-MIR171c	-	4202	GATCAAACACCCTCTTC	0	0	0	0	0	0	0	0	3	0	0	0	0
ath-MIR171c	-	8603	GATCTACAAAGCAAATT	0	1	6	2	1	0	0	3	8	0	0	0	0
ath-MIR171c	-	8866	GATCAAAACTGCATTTT	0	2	0	0	0	0	0	0	0	0	0	0	0
ath-MIR171c	-	6359	GATCACCGGACTTGAGA	0	0	0	5	5	0	0	0	1	0	0	0	1
ath-MIR171c	-	120	GATCACGCTCTTACTTA	0	0	0	0	0	3	0	0	0	0	0	0	0
ath-MIR171c	-	6420	GATCACAGACCGTGCAG	0	3	0	0	0	0	0	0	0	0	0	0	0
ath-MIR171c	-	7146	GATCTAGAAACATCGAT	0	0	0	4	0	0	0	0	1	0	0	0	9
ath-MIR171c	-	6795	GATCATCTTTCATCTCT	0	0	2	0	0	2	0	0	3	1	2	4	0
ath-MIR171c	-	9610	GATCACTATTCATCTGA	0	0	0	0	0	0	0	0	5	0	0	0	0
ath-MIR171c	-	3855	GATCCCTTGTTGGAGCA	0	0	2	0	0	0	0	0	0	0	0	0	0
ath-MIR171c	-	905	GATCAAAGAATTTCCAC	0	0	0	2	0	0	0	0	0	0	0	0	0
ath-MIR171c	-	8065	GATCCTCTCATCTTCAA	0	1	0	0	0	2	0	0	0	0	0	0	0
ath-MIR171c	-	6508	GATCGGGACATATGTGG	0	1	0	6	0	4	0	0	0	0	7	0	14
ath-MIR171c	-	8259	GATCCAAGCAAAAGATT	0	2	0	0	0	0	0	0	0	0	0	0	0
ath-MIR171c	-	3855	GATCCCTTGTTGGAGCAGGA	0	0	3	0	0	0	0	0	0	0	0	0	0
ath-MIR171c	-	8259	GATCCAAGCAAAAGATTGTA	0	3	0	0	0	0	0	0	0	0	0	0	0
ath-MIR171c	-	6795	GATCATCTTTCATCTCTCTC	0	0	2	0	0	2	0	0	4	2	2	3	0
ath-MIR171c	-	120	GATCACGCTCTTACTTATGT	0	0	0	0	0	4	0	0	0	0	0	0	0
ath-MIR171c	-	9610	GATCACTATTCATCTGAGTC	0	0	0	0	0	0	0	0	5	0	0	0	0
ath-MIR171c	-	6508	GATCGGGACATATGTGGAAC	0	1	0	7	0	5	0	0	0	0	8	0	17
ath-MIR171c	-	6359	GATCACCGGACTTGAGATGG	0	0	2	4	0	0	0	0	0	0	0	0	0
ath-MIR171c	-	8603	GATCTACAAAGCAAATTCCC	0	2	1	0	0	0	0	2	0	0	0	0	0
ath-MIR171c	-	8065	GATCCTCTCATCTTCAACAA	0	1	0	0	0	2	0	0	0	0	0	0	0
ath-MIR171c	-	4202	GATCAAACACCCTCTTCATC	0	0	0	0	0	0	0	0	3	0	0	0	0
ath-MIR171c	-	7146	GATCTAGAAACATCGATTTC	0	0	0	4	0	0	0	0	1	0	0	0	10
ath-MIR171c	-	8866	GATCAAAACTGCATTTTCAG	0	2	0	0	0	0	0	0	0	0	0	0	0
ath-MIR171c	-	6420	GATCACAGACCGTGCAGATG	0	4	0	0	0	0	0	0	0	0	0	0	0
ath-MIR824	+	7658	GATCGTTGGGGAAGTAG	0	0	1	2	0	0	0	0	0	0	0	0	0
ath-MIR824	+	6896	GATCGCGCTAGCAACTG	0	0	0	0	0	0	0	0	0	0	2	0	0
ath-MIR824	+	7710	GATCGGGATGTGTCTGA	0	0	0	0	0	0	0	0	0	0	0	0	3
ath-MIR824	+	8706	GATCGTCAAGAGAATGT	101	27	32	27	41	91	31	0	84	42	60	57	52
ath-MIR824	+	581	GATCTTGTGTTAGTAAA	0	0	0	0	0	0	0	0	0	0	0	5	0
ath-MIR824	+	581	GATCTTGTGTTAGTAAATTA	0	0	0	0	0	0	0	0	0	0	0	5	0
ath-MIR824	+	8706	GATCGTCAAGAGAATGTGAG	115	30	37	34	43	110	35	0	93	49	71	67	77
ath-MIR824	+	7710	GATCGGGATGTGTCTGACGG	0	0	0	0	0	0	0	0	0	0	0	0	3
ath-MIR824	+	7658	GATCGTTGGGGAAGTAGAGA	0	0	1	3	0	0	0	0	0	0	0	0	0
ath-MIR824	+	6896	GATCGCGCTAGCAACTGCAA	0	0	0	0	0	0	0	0	0	0	2	0	0
ath-MIR173	+	827	GATCATTTACTTGCAAA	0	0	0	0	0	0	0	0	0	3	0	0	0
ath-MIR173	+	2026	GATCAGTATTTGTTGGT	0	0	0	0	0	0	0	0	0	3	0	0	0
ath-MIR173	+	6835	GATCTAGAACTCCGTTT	4	0	0	0	0	0	0	0	0	0	0	0	0
ath-MIR173	+	6835	GATCTAGAACTCCGTTTGGG	4	0	0	0	0	0	0	0	0	0	0	0	0
ath-MIR173	+	827	GATCATTTACTTGCAAAGTG	0	0	0	0	0	0	0	0	0	3	0	0	0
ath-MIR173	+	2026	GATCAGTATTTGTTGGTACG	0	0	0	0	0	0	0	0	0	3	0	0	0
ath-MIR167a	+	5555	GATCGTTTCAGGCTTTC	0	1	7	0	0	0	14	1	6	0	0	0	29
ath-MIR167a	+	4758	GATCAATCCGAGCCGGA	0	0	2	0	0	0	0	1	1	0	0	0	6
ath-MIR167a	+	4703	GATCTCCCCTTCGCCGC	0	0	0	7	0	0	0	0	5	0	0	0	4
ath-MIR167a	+	160	GATCTGAAGAATTTATG	0	0	0	0	0	2	0	0	0	0	0	0	0
ath-MIR167a	+	6080	GATCATGGAAAGAAAGT	0	0	2	1	0	0	0	1	12	0	0	0	2
ath-MIR167a	+	6029	GATCCTGCTGGGATGGG	0	0	0	2	0	0	0	1	6	0	18	0	15
ath-MIR167a	+	1133	GATCGTCATCAACTAAT	0	0	0	0	0	0	0	0	0	0	0	0	2
ath-MIR167a	+	6261	GATCCCTCGAGGCCTCA	66	274	350	309	192	173	802	1189	1682	242	724	120	315
ath-MIR167a	+	5906	GATCCGGAGACTACAGT	0	1	4	0	3	0	0	0	28	0	0	0	0
ath-MIR167a	+	8651	GATCAGATTAACCCACA	0	0	1	0	0	0	0	0	0	0	0	0	0
ath-MIR167a	+	8027	GATCAATCTTTATTCAA	4	0	0	0	0	0	0	0	0	0	0	0	0
ath-MIR167a	+	5513	GATCTTGAGGTTCTTGA	0	0	0	0	0	0	0	0	44	0	0	0	0
ath-MIR167a	+	4758	GATCAATCCGAGCCGGATTA	0	0	1	0	0	0	0	0	0	0	0	0	0
ath-MIR167a	+	4703	GATCTCCCCTTCGCCGCGGT	0	0	0	8	0	0	0	0	6	0	0	0	3
ath-MIR167a	+	1133	GATCGTCATCAACTAATAGG	0	0	0	0	0	0	0	0	0	0	0	0	2
ath-MIR167a	+	5906	GATCCGGAGACTACAGTGGT	0	1	5	0	0	0	0	0	30	0	0	0	0
ath-MIR167a	+	5555	GATCGTTTCAGGCTTTCGCC	0	1	6	0	0	0	16	2	7	0	0	0	36
ath-MIR167a	+	160	GATCTGAAGAATTTATGTTT	0	0	0	0	0	1	0	0	0	0	0	0	0
ath-MIR167a	+	6080	GATCATGGAAAGAAAGTACT	0	0	2	2	0	0	0	2	11	0	0	0	0
ath-MIR167a	+	5513	GATCTTGAGGTTCTTGAGCC	0	0	0	0	0	0	0	0	47	0	0	0	0
ath-MIR167a	+	6261	GATCCCTCGAGGCCTCAAGA	75	292	360	340	197	179	807	1264	1776	274	794	135	346
ath-MIR167a	+	6029	GATCCTGCTGGGATGGGTCA	0	0	0	0	0	0	0	0	2	0	20	0	4
ath-MIR390a	+	5263	GATCACTGTTTTTTGCG	27	11	5	17	5	0	1	1	32	48	17	2	4
ath-MIR390a	+	8461	GATCTGAGAAAGAGAGA	0	0	0	0	4	0	0	0	14	0	2	0	0
ath-MIR390a	+	7975	GATCACAAAGATACTGA	0	0	2	0	0	0	0	0	0	0	0	0	2
ath-MIR390a	+	8256	GATCCGCGAGCTCAGCC	0	0	0	0	0	2	0	0	0	0	0	0	9
ath-MIR390a	+	1321	GATCCGACCAATCATAT	0	0	0	0	0	0	0	0	0	0	0	1	0
ath-MIR390a	+	5488	GATCATAGCTGTAACCT	0	0	0	0	0	0	0	0	0	0	0	2	0
ath-MIR390a	+	5053	GATCTGGACTGGTTTGT	0	0	2	0	0	0	0	0	0	0	0	0	0
ath-MIR390a	+	3799	GATCCAATCCTGATATT	0	0	0	0	0	2	0	0	0	0	0	0	0
ath-MIR390a	+	2718	GATCCTGGGTTCGTACC	0	0	0	0	0	0	0	0	0	0	1	0	0
ath-MIR390a	+	7656	GATCCACAACATTTTCA	0	3	0	0	3	0	0	0	0	0	0	0	2
ath-MIR390a	+	8055	GATCCGTGGGACGGAAC	0	0	2	0	0	0	0	0	0	0	0	0	0
ath-MIR390a	+	8350	GATCGGTGGTTGAGATT	0	2	0	0	0	0	0	0	0	0	0	0	0
ath-MIR390a	+	8019	GATCGGAGAATGTACGA	0	0	0	0	0	0	0	0	0	0	18	0	0
ath-MIR390a	+	4816	GATCTCAACCGGTGAAT	0	0	0	2	0	0	0	0	0	0	0	0	0
ath-MIR390a	+	7766	GATCGGAATCGCATTTA	0	2	0	0	0	0	0	0	0	0	0	0	0
ath-MIR390a	+	7975	GATCACAAAGATACTGAACA	0	0	2	0	0	0	0	0	0	0	0	0	2
ath-MIR390a	+	2718	GATCCTGGGTTCGTACCTTA	0	0	0	0	0	0	0	0	0	0	1	0	0
ath-MIR390a	+	7766	GATCGGAATCGCATTTACAC	0	1	0	0	0	0	0	0	0	0	0	0	0
ath-MIR390a	+	5263	GATCACTGTTTTTTGCGGTA	31	11	6	17	5	0	1	0	35	56	19	3	4
ath-MIR390a	+	4816	GATCTCAACCGGTGAATGCT	0	0	0	2	0	0	0	0	0	0	0	0	0
ath-MIR390a	+	3799	GATCCAATCCTGATATTTGT	0	0	0	0	0	2	0	0	0	0	0	0	0
ath-MIR390a	+	1321	GATCCGACCAATCATATACA	0	0	0	0	0	0	0	0	0	0	0	1	0
ath-MIR390a	+	5053	GATCTGGACTGGTTTGTTCC	0	0	1	0	0	0	0	0	0	0	0	0	0
ath-MIR390a	+	8461	GATCTGAGAAAGAGAGAAGA	0	0	0	0	3	0	0	0	0	0	1	0	0
ath-MIR390a	+	8256	GATCCGCGAGCTCAGCCCAA	0	0	0	0	0	2	0	0	0	0	0	0	13
ath-MIR390a	+	5488	GATCATAGCTGTAACCTTCC	0	0	0	0	0	0	0	0	0	0	0	2	0
ath-MIR390a	+	8055	GATCCGTGGGACGGAACAAG	0	0	2	0	0	0	0	0	0	0	0	0	0
ath-MIR390a	+	8350	GATCGGTGGTTGAGATTCGA	0	2	0	0	0	0	0	0	0	0	0	0	0
ath-MIR390a	+	7656	GATCCACAACATTTTCACGT	0	4	0	0	0	0	0	0	0	0	0	0	0
ath-MIR390a	+	8019	GATCGGAGAATGTACGACCG	0	0	0	0	0	0	0	0	0	0	21	0	0
ath-MIR866	-	5677	GATCTTGTTTTTGTGAG	0	0	2	0	0	0	0	0	0	0	0	0	0
ath-MIR866	-	8102	GATCGTAAATTGATGGC	0	0	0	0	1	0	0	0	0	0	0	0	0
ath-MIR866	-	9964	GATCGCAGGAAAGACTG	75	7	119	63	20	104	182	329	85	116	181	260	101
ath-MIR866	-	2986	GATCACTTCTTCCATCG	0	1	0	0	0	0	0	0	0	0	0	0	0
ath-MIR866	-	1888	GATCCAAAAAAGAAAAA	0	0	0	0	0	0	0	0	0	0	0	2	0
ath-MIR866	-	5439	GATCAGAGCGTAGATAG	0	1	0	0	0	0	0	0	0	0	0	0	0
ath-MIR866	-	8794	GATCGTTAACAGCGAAT	0	0	2	1	0	0	0	1	5	0	0	0	5
ath-MIR866	-	8724	GATCGATAACCAACAAG	0	0	0	0	0	0	0	0	3	0	0	0	0
ath-MIR866	-	8724	GATCGATAACCAACAAGCGA	0	0	0	0	0	0	0	0	3	0	0	0	0
ath-MIR866	-	5439	GATCAGAGCGTAGATAGATG	0	1	0	0	0	0	0	0	0	0	0	0	0
ath-MIR866	-	8794	GATCGTTAACAGCGAATCAG	0	0	3	1	0	0	0	1	4	0	0	0	6
ath-MIR866	-	2986	GATCACTTCTTCCATCGACG	0	1	0	0	0	0	0	0	0	0	0	0	0
ath-MIR866	-	9964	GATCGCAGGAAAGACTGCAA	92	8	135	73	23	121	202	365	94	133	207	303	130
ath-MIR866	-	5677	GATCTTGTTTTTGTGAGGCA	0	0	2	0	0	0	0	0	0	0	0	0	0
ath-MIR4228	+	3406	GATCTCCATGGAGAAGT	0	0	1	0	0	0	0	0	0	0	0	0	0
ath-MIR4228	+	2851	GATCCGTCTGCAAGTTC	0	0	0	0	0	0	0	0	5	0	0	0	0
ath-MIR4228	+	634	GATCTTAATGGTCTTTG	38	0	5	6	1	0	0	30	26	24	9	12	10
ath-MIR4228	+	42	GATCTGAGGGCTTTGTT	1	2	5	3	3	0	0	0	0	3	10	4	4
ath-MIR4228	+	3572	GATCGGTGGATTGAAAT	0	0	0	1	0	0	0	0	0	0	0	0	0
ath-MIR4228	+	3639	GATCTAGAAAGCTTGGA	5	21	48	45	8	5	7	9	44	25	50	12	35
ath-MIR4228	+	6008	GATCTTGTGTCTTTTAT	0	0	0	0	0	0	0	6	0	7	0	0	0
ath-MIR4228	+	5887	GATCACACTCATTAACA	0	0	0	0	0	0	0	0	0	5	0	1	0
ath-MIR4228	+	2810	GATCTTCTCATCTCTTC	0	0	2	0	0	0	0	0	0	0	0	0	0
ath-MIR4228	+	1027	GATCCTTTGTTTCTCGC	0	0	0	0	0	0	0	0	0	0	0	5	0
ath-MIR4228	+	3076	GATCTCCTCAGCCTGTA	0	0	0	0	0	0	0	0	0	0	3	0	0
ath-MIR4228	+	1027	GATCCTTTGTTTCTCGCTGT	0	0	0	0	0	0	0	0	0	0	0	5	0
ath-MIR4228	+	5887	GATCACACTCATTAACATGT	0	0	0	0	0	0	0	0	0	2	0	0	0
ath-MIR4228	+	3639	GATCTAGAAAGCTTGGAGTG	0	8	47	41	7	6	6	10	45	10	53	2	49
ath-MIR4228	+	2851	GATCCGTCTGCAAGTTCTTC	0	0	0	0	0	0	0	0	4	0	0	0	0
ath-MIR4228	+	2810	GATCTTCTCATCTCTTCCTA	0	0	2	0	0	0	0	0	0	0	0	0	0
ath-MIR4228	+	634	GATCTTAATGGTCTTTGGCA	36	0	0	8	0	0	0	0	7	25	11	13	0
ath-MIR4228	+	6008	GATCTTGTGTCTTTTATTAT	0	0	0	0	0	0	0	6	0	1	0	0	0
ath-MIR4228	+	3076	GATCTCCTCAGCCTGTAGCT	0	0	0	0	0	0	0	0	0	0	3	0	0
ath-MIR4228	+	42	GATCTGAGGGCTTTGTTTTT	0	1	2	1	8	0	0	0	0	2	13	0	4
ath-MIR400	+	1880	GATCCACGTCAGTTGTG	0	0	0	0	0	0	0	0	0	0	0	3	0
ath-MIR400	+	612	GATCAAACATAGTATAG	0	0	0	0	0	0	0	0	0	0	0	2	0
ath-MIR400	+	1880	GATCCACGTCAGTTGTGGCT	0	0	0	0	0	0	0	0	0	0	0	3	0
ath-MIR405b	+	3230	GATCATTCAATTCGGTT	0	0	0	1	0	1	0	0	0	1	0	0	0
ath-MIR405b	+	4565	GATCCTCTTTTGAATCT	0	1	0	2	0	0	13	0	0	5	0	0	0
ath-MIR405b	+	9848	GATCCTATTGTTGCTAA	0	0	0	0	3	0	0	0	0	0	3	0	0
ath-MIR405b	+	9717	GATCCTTACTTTGAGAA	1	0	0	0	0	0	0	0	0	0	0	0	0
ath-MIR405b	+	3621	GATCTTGCTTGACAACC	0	0	8	8	0	0	0	0	0	1	0	0	0
ath-MIR405b	+	4887	GATCTGCCTTCTCTCCT	0	5	2	1	0	0	0	0	0	0	2	0	0
ath-MIR405b	+	3230	GATCATTCAATTCGGTTGAA	0	0	0	0	0	1	0	0	0	0	0	0	0
ath-MIR405b	+	4887	GATCTGCCTTCTCTCCTTTC	0	3	2	0	0	0	0	0	0	0	3	0	0
ath-MIR405b	+	3621	GATCTTGCTTGACAACCGCG	0	0	9	10	0	0	0	0	0	2	0	0	0
ath-MIR405b	+	4565	GATCCTCTTTTGAATCTCCA	0	1	0	0	0	0	0	0	0	0	0	0	0
ath-MIR405b	+	9848	GATCCTATTGTTGCTAATGA	0	0	0	0	3	0	0	0	0	0	4	0	0
ath-MIR831	+	5171	GATCCATGAGTACGCAT	0	1	0	0	0	0	0	0	0	0	0	0	0
ath-MIR831	+	2342	GATCGGTGTGTTGTAAA	0	0	0	3	0	14	0	0	0	0	0	0	0
ath-MIR831	+	2917	GATCCATCGCACTGGAT	0	0	0	4	0	0	0	0	11	1	0	0	0
ath-MIR831	+	6676	GATCCATGGTGGGTCTT	0	0	3	0	0	0	0	0	0	0	0	0	0
ath-MIR831	+	734	GATCTCCTTCTTTGACA	0	0	0	0	0	0	0	0	0	0	14	0	0
ath-MIR831	+	4217	GATCTTCAGCCTTTAAC	0	0	0	2	0	0	0	0	0	0	0	0	0
ath-MIR831	+	4727	GATCCTCAGAGGATGGT	0	2	0	0	0	0	0	0	0	0	0	0	0
ath-MIR831	+	1835	GATCCCTGCGTCAAAAA	0	0	0	4	1	0	0	0	0	0	0	0	0
ath-MIR831	+	3456	GATCTTTGCCAGTGCGG	0	0	0	0	0	0	0	0	0	0	0	0	4
ath-MIR831	+	734	GATCTCCTTCTTTGACACGG	0	0	0	0	0	0	0	0	0	0	18	0	0
ath-MIR831	+	3456	GATCTTTGCCAGTGCGGCGG	0	0	0	0	0	0	0	0	0	0	0	0	5
ath-MIR831	+	2917	GATCCATCGCACTGGATGAT	0	0	0	4	0	0	0	0	10	1	0	0	0
ath-MIR831	+	2342	GATCGGTGTGTTGTAAAGCT	0	0	0	3	0	17	0	0	0	0	0	0	0
ath-MIR831	+	1835	GATCCCTGCGTCAAAAACTT	0	0	0	4	0	0	0	0	0	0	0	0	0
ath-MIR831	+	4217	GATCTTCAGCCTTTAACCAC	0	0	0	2	0	0	0	0	0	0	0	0	0
ath-MIR831	+	4727	GATCCTCAGAGGATGGTTTT	0	1	0	0	0	0	0	0	0	0	0	0	0
ath-MIR170	-	806	GATCGCCCCACAGGCAT	0	2	0	0	0	0	0	9	9	3	1	2	116
ath-MIR170	-	598	GATCGGTGGTGGCTTTG	0	0	0	0	0	0	0	0	0	0	0	0	14
ath-MIR170	-	876	GATCCTAATGATGCTAT	5	0	0	0	0	0	0	0	0	0	0	0	0
ath-MIR170	-	2489	GATCTCGACGCCCGTTT	0	0	9	2	0	0	0	9	0	0	0	0	0
ath-MIR170	-	4601	GATCTTCAGAGTGCTTT	0	0	0	0	0	0	0	0	1	0	0	0	0
ath-MIR170	-	6324	GATCCAGAAGTGTCAGC	147	23	2	7	14	31	0	0	33	84	57	226	0
ath-MIR170	-	187	GATCGGATGCTCCTTTC	0	0	0	0	0	0	0	0	0	0	0	0	8
ath-MIR170	-	5247	GATCGAGAGATATCGAG	0	0	0	0	0	2	0	0	0	0	0	0	0
ath-MIR170	-	618	GATCTACCACCGCTCTG	0	0	0	0	0	0	0	0	44	0	2	8	29
ath-MIR170	-	4366	GATCCGTGCTCACGCGC	0	0	0	0	0	0	0	0	0	0	1	0	0
ath-MIR170	-	8002	GATCAGTTCTTGCTTCC	0	0	0	0	1	0	0	0	3	0	0	0	0
ath-MIR170	-	1855	GATCCCAATTTGAGGGA	5	0	0	14	0	0	0	0	10	3	7	0	0
ath-MIR170	-	4849	GATCAAAAGTCTTGAAG	0	0	0	3	0	0	0	0	0	0	0	2	0
ath-MIR170	-	4068	GATCTGAAATGTCCATG	0	2	0	0	0	0	0	0	0	0	0	1	0
ath-MIR170	-	8550	GATCCATGCCTTTTATG	0	0	0	0	0	0	0	0	0	0	0	0	1
ath-MIR170	-	187	GATCGGATGCTCCTTTCTCC	0	0	0	0	0	0	0	0	0	0	0	0	11
ath-MIR170	-	4849	GATCAAAAGTCTTGAAGTGA	0	0	0	3	0	0	0	0	0	0	0	2	0
ath-MIR170	-	4068	GATCTGAAATGTCCATGCAG	0	3	0	0	0	0	0	0	0	0	0	1	0
ath-MIR170	-	2489	GATCTCGACGCCCGTTTCCG	0	0	11	2	0	0	0	7	0	0	0	0	0
ath-MIR170	-	4366	GATCCGTGCTCACGCGCTTT	0	0	0	0	0	0	0	0	0	0	1	0	0
ath-MIR170	-	5247	GATCGAGAGATATCGAGACT	0	0	0	0	0	1	0	0	0	0	0	0	0
ath-MIR170	-	1855	GATCCCAATTTGAGGGACTC	0	0	0	6	0	0	0	0	11	4	8	0	0
ath-MIR170	-	4601	GATCTTCAGAGTGCTTTGGC	0	0	0	0	0	0	0	0	1	0	0	0	0
ath-MIR170	-	598	GATCGGTGGTGGCTTTGATA	0	0	0	3	0	0	0	0	0	0	0	0	8
ath-MIR170	-	876	GATCCTAATGATGCTATGTT	6	0	0	0	0	0	0	0	0	0	0	0	0
ath-MIR170	-	806	GATCGCCCCACAGGCATGTC	0	2	0	0	0	0	0	10	9	2	0	2	134
ath-MIR170	-	6324	GATCCAGAAGTGTCAGCAAG	165	24	2	8	16	39	0	0	36	95	67	254	0
ath-MIR170	-	618	GATCTACCACCGCTCTGGCA	0	0	0	0	0	0	0	0	50	0	0	11	42
ath-MIR170	-	8550	GATCCATGCCTTTTATGTGG	0	0	0	0	0	0	0	0	0	0	0	0	1
ath-MIR781	+	671	GATCAAATGGCTGTTTC	0	0	0	0	0	0	0	0	0	0	11	0	0
ath-MIR781	+	272	GATCCCCATTCACGCTG	2	0	0	0	0	0	0	1	0	5	5	13	0
ath-MIR781	+	8607	GATCAATATCCCAAGGA	0	0	0	0	0	0	0	0	0	0	7	0	0
ath-MIR781	+	3576	GATCATCAATCGTTGTG	0	0	0	0	0	0	0	0	0	0	0	3	0
ath-MIR781	+	3706	GATCATCAATCATTGTG	0	0	0	0	0	0	0	0	0	0	1	24	0
ath-MIR781	+	8875	GATCATCAATTATTCAT	0	0	0	0	0	0	0	0	0	0	0	2	0
ath-MIR781	+	8004	GATCACTTGCACGGTTC	0	2	0	0	0	0	0	0	0	0	0	0	0
ath-MIR781	+	7521	GATCTTTGTTTTTATGT	0	0	0	0	0	8	0	0	0	0	0	0	0
ath-MIR781	+	3475	GATCAGGTTTCTTCCCG	0	0	0	0	0	0	0	0	0	0	5	4	0
ath-MIR781	+	8607	GATCAATATCCCAAGGAGGT	0	0	0	0	0	0	0	0	0	0	8	0	0
ath-MIR781	+	671	GATCAAATGGCTGTTTCGTT	0	0	0	0	0	0	0	0	0	0	12	0	0
ath-MIR781	+	8875	GATCATCAATTATTCATTTT	0	0	0	0	0	0	0	0	0	0	0	3	0
ath-MIR781	+	272	GATCCCCATTCACGCTGATA	2	0	0	0	0	0	0	1	0	5	6	15	0
ath-MIR781	+	3475	GATCAGGTTTCTTCCCGCAT	0	0	0	0	0	0	0	0	0	0	6	3	0
ath-MIR781	+	3706	GATCATCAATCATTGTGTAT	0	0	0	0	0	0	0	0	0	0	0	7	0
ath-MIR781	+	3576	GATCATCAATCGTTGTGTTT	0	0	0	0	0	0	0	0	0	0	0	2	0
ath-MIR160a	+	4383	GATCTTCAGTCTCATGC	0	0	0	0	0	0	0	0	0	0	2	0	0
ath-MIR160a	+	4098	GATCAAAGGAACCGCCC	0	0	0	0	0	0	0	0	0	0	0	0	10
ath-MIR160a	+	4383	GATCTTCAGTCTCATGCTCC	0	0	0	0	0	0	0	0	0	0	3	0	0
ath-MIR160a	+	4098	GATCAAAGGAACCGCCCATT	0	0	0	0	0	0	0	0	0	0	0	0	12
ath-MIR172c	-	7489	GATCAGAAACTCGAGTC	0	0	3	0	2	0	0	0	0	0	0	0	0
ath-MIR172c	-	7112	GATCTCGCTGATGCAAG	0	0	0	0	0	2	0	0	0	0	0	0	0
ath-MIR172c	-	7508	GATCGAGAATCTGACAT	0	0	0	0	0	5	0	0	0	0	0	0	0
ath-MIR172c	-	5469	GATCTGCATTTTCTAAT	1	0	0	0	0	0	0	0	0	5	0	0	0
ath-MIR172c	-	5401	GATCGAATCTAAATCTG	0	0	0	0	1	0	0	0	0	0	0	0	0
ath-MIR172c	-	7141	GATCAGAACCGTAAAAA	0	1	0	0	0	0	0	0	0	0	0	0	0
ath-MIR172c	-	7619	GATCCATGTCTCAGCTG	0	0	0	3	2	0	0	0	0	0	2	0	0
ath-MIR172c	-	8323	GATCGTTTTTCAAGTAT	0	0	0	0	0	0	0	0	0	0	0	7	0
ath-MIR172c	-	7508	GATCGAGAATCTGACATCGG	0	0	0	0	0	5	0	0	0	0	0	0	0
ath-MIR172c	-	8323	GATCGTTTTTCAAGTATAAC	0	0	0	0	0	0	0	0	0	0	0	6	0
ath-MIR172c	-	5401	GATCGAATCTAAATCTGTAT	0	0	0	0	2	0	0	0	0	0	0	0	0
ath-MIR172c	-	7112	GATCTCGCTGATGCAAGACG	0	0	0	0	0	1	0	0	0	0	0	0	0
ath-MIR172c	-	5469	GATCTGCATTTTCTAATCCT	1	0	0	0	0	0	0	0	0	5	0	0	0
ath-MIR172c	-	7619	GATCCATGTCTCAGCTGCTC	0	0	0	3	0	0	0	0	0	0	2	0	0
ath-MIR172c	-	7489	GATCAGAAACTCGAGTCGGG	0	0	3	0	2	0	0	0	0	0	0	0	0
ath-MIR171a	+	882	GATCTTGTCTTCTTTTG	0	8	0	0	12	0	0	0	17	0	0	0	0
ath-MIR171a	+	2207	GATCAATGTCTCCTCAA	0	0	2	0	0	0	0	0	0	0	0	0	0
ath-MIR171a	+	7501	GATCTTGATGATGATGA	0	2	1	0	0	0	0	0	0	0	0	0	0
ath-MIR171a	+	4779	GATCACCAGTTTGGTGA	0	0	0	0	0	0	0	0	1	0	0	0	0
ath-MIR171a	+	3572	GATCATCACTGTGTTTG	0	3	0	0	0	0	0	0	0	0	0	0	0
ath-MIR171a	+	4613	GATCTTCAACCGCTACA	0	0	2	0	0	0	0	0	0	0	0	0	0
ath-MIR171a	+	3166	GATCAGCCTCATGTCCC	0	0	0	0	3	0	0	0	0	0	0	0	2
ath-MIR171a	+	4361	GATCAAGACCCTACACC	17	4	8	10	11	35	0	3	23	35	49	48	0
ath-MIR171a	+	4361	GATCAAGACCCTACACCTGC	0	4	5	12	2	37	0	2	12	39	46	47	0
ath-MIR171a	+	4779	GATCACCAGTTTGGTGACCA	0	0	0	0	0	0	0	0	1	0	0	0	0
ath-MIR171a	+	882	GATCTTGTCTTCTTTTGGTT	8	1	0	1	0	0	0	0	16	0	0	0	0
ath-MIR171a	+	3572	GATCATCACTGTGTTTGGTT	0	2	0	0	0	0	0	0	0	0	0	0	0
ath-MIR171a	+	3166	GATCAGCCTCATGTCCCAGA	0	0	0	0	2	0	0	0	0	0	0	0	3
ath-MIR171a	+	4613	GATCTTCAACCGCTACATCT	0	0	3	0	0	0	0	0	0	0	0	0	0
ath-MIR156b	+	4111	GATCATCATTGACGACA	0	0	0	0	0	0	0	0	0	0	0	1	0
ath-MIR156b	+	2887	GATCGGTAGATACAGAT	0	0	0	0	0	0	0	0	0	0	0	3	0
ath-MIR156b	+	4619	GATCCCATGTCCTCTTC	0	0	0	0	1	0	0	0	0	0	0	0	0
ath-MIR156b	+	6251	GATCCGGTGGAGAAGCC	0	0	0	0	0	0	0	0	0	0	0	0	2
ath-MIR156b	+	9698	GATCCACATTTTTCAGG	0	0	0	0	0	0	0	0	0	0	5	0	0
ath-MIR156b	+	4111	GATCATCATTGACGACATTT	0	0	0	0	0	0	0	0	0	0	0	1	0
ath-MIR156b	+	9698	GATCCACATTTTTCAGGGAT	0	0	0	0	0	0	0	0	0	0	6	0	0
ath-MIR156b	+	6251	GATCCGGTGGAGAAGCCATT	0	0	0	0	0	0	0	0	0	0	0	0	2
ath-MIR156b	+	2887	GATCGGTAGATACAGATTTG	0	0	0	0	0	0	0	0	0	0	0	4	0
ath-MIR156b	+	4619	GATCCCATGTCCTCTTCCAT	0	0	0	0	1	0	0	0	0	0	0	0	0
ath-MIR164c	+	9070	GATCTTACTCTGTGCCG	0	0	1	3	0	0	0	0	0	0	0	0	0
ath-MIR164c	+	9674	GATCTTCTCCAATGGGT	0	0	0	4	0	0	0	0	0	0	0	0	0
ath-MIR164c	+	7132	GATCGCTTCTTACAGTT	3	0	14	10	0	6	0	0	5	0	82	0	0
ath-MIR164c	+	9757	GATCAGGTCTCACCTTT	0	0	0	0	0	0	0	0	0	3	0	0	0
ath-MIR164c	+	7132	GATCGCTTCTTACAGTTCCA	2	0	15	12	0	7	0	0	6	0	94	0	0
ath-MIR164c	+	9757	GATCAGGTCTCACCTTTCTC	0	0	0	0	0	0	0	0	0	3	0	0	0
ath-MIR164c	+	9070	GATCTTACTCTGTGCCGGGT	0	0	1	3	0	0	0	0	0	0	0	0	0
ath-MIR164c	+	9674	GATCTTCTCCAATGGGTTCG	0	0	0	5	0	0	0	0	0	0	0	0	0
ath-MIR5025	+	8651	GATCAAAGCCAAACTTG	0	3	5	0	0	0	0	0	0	0	0	0	21
ath-MIR5025	+	7141	GATCCTGCAGAACGCAT	0	4	0	0	0	0	0	0	0	0	0	0	0
ath-MIR5025	+	7429	GATCGCCGGTATTACAC	43	26	13	6	5	0	0	3	0	10	72	27	0
ath-MIR5025	+	7383	GATCCAAGAAAAGTGAG	0	0	0	0	0	0	0	0	0	0	4	0	0
ath-MIR5025	+	5651	GATCGGCTGGGGATTTG	0	0	0	0	0	0	0	0	0	0	0	0	2
ath-MIR5025	+	9488	GATCAGGAAGAGTTGTC	2	20	11	4	0	11	0	0	0	0	25	4	14
ath-MIR5025	+	9599	GATCTAATTAACGTCTT	44	8	10	9	0	35	0	0	0	0	12	18	0
ath-MIR5025	+	9599	GATCTAATTAACGTCTTTGA	3	0	0	0	0	0	0	0	0	0	0	0	0
ath-MIR5025	+	7429	GATCGCCGGTATTACACTTT	49	30	16	8	0	0	0	4	0	11	82	32	0
ath-MIR5025	+	8651	GATCAAAGCCAAACTTGAGC	0	4	5	0	0	0	0	0	0	0	0	0	26
ath-MIR5025	+	5651	GATCGGCTGGGGATTTGGGC	0	0	0	0	0	0	0	0	0	0	0	0	2
ath-MIR5025	+	7141	GATCCTGCAGAACGCATCAG	0	4	0	0	0	0	0	0	0	0	0	0	0
ath-MIR5025	+	9488	GATCAGGAAGAGTTGTCATG	1	22	13	4	0	14	0	0	0	0	24	3	20
ath-MIR5025	+	7383	GATCCAAGAAAAGTGAGTGA	0	0	0	0	0	0	0	0	0	0	4	0	0
ath-MIR780	-	8201	GATCTCTCTCACTTCAT	0	0	0	0	0	0	0	0	0	0	0	2	0
ath-MIR780	-	2185	GATCTCGAGTATGCATT	0	4	0	0	0	0	0	0	0	0	0	0	0
ath-MIR780	-	3639	GATCTTGTCCTCTTTGT	0	8	0	11	0	0	0	0	0	0	0	0	0
ath-MIR780	-	7863	GATCTTAACAGTATTTG	2	0	0	0	0	0	0	0	0	6	0	14	0
ath-MIR780	-	3749	GATCTGTTTCTTCTCAG	0	0	0	0	0	0	0	0	0	1	0	8	0
ath-MIR780	-	1698	GATCAGAAACTTCTGGT	2	0	0	0	0	0	0	0	0	0	0	0	0
ath-MIR780	-	1698	GATCAGAAACTTCTGGTTTC	2	0	0	0	0	0	0	0	0	0	0	0	0
ath-MIR780	-	3749	GATCTGTTTCTTCTCAGTTC	0	0	0	0	0	0	0	0	0	1	0	9	0
ath-MIR780	-	3639	GATCTTGTCCTCTTTGTTCT	0	4	0	1	0	0	0	0	0	0	0	0	0
ath-MIR780	-	2185	GATCTCGAGTATGCATTTGT	0	4	0	0	0	0	0	0	0	0	0	0	0
ath-MIR780	-	8201	GATCTCTCTCACTTCATCAT	0	0	0	0	0	0	0	0	0	0	0	2	0
ath-MIR397a	+	8573	GATCCAATTCCAAGAAT	0	0	0	0	1	0	0	0	0	3	0	0	0
ath-MIR397a	+	1468	GATCCTTGAGAAGCGGC	0	0	0	0	0	2	0	0	0	0	0	0	0
ath-MIR397a	+	1390	GATCTTGAGAAATCTGA	0	4	1	0	0	0	0	0	0	0	0	0	0
ath-MIR397a	+	1448	GATCAGCAGAAACAGTT	0	0	0	0	0	1	0	0	0	0	0	0	0
ath-MIR397a	+	858	GATCACCATATTTCGCA	0	1	0	0	0	9	0	0	0	0	0	0	0
ath-MIR397a	+	925	GATCAATTTTCTATTCT	0	0	3	0	0	0	0	0	0	0	0	0	0
ath-MIR397a	+	7613	GATCCTTCAGAAGCGGC	0	0	1	0	0	0	0	0	0	0	0	0	3
ath-MIR397a	+	8042	GATCATTCCTCCTTGAA	0	2	0	0	0	0	0	0	0	0	0	0	0
ath-MIR397a	+	858	GATCACCATATTTCGCAGTG	0	1	0	0	0	9	0	0	0	0	0	0	0
ath-MIR397a	+	1468	GATCCTTGAGAAGCGGCTTT	0	0	0	0	0	2	0	0	0	0	0	0	0
ath-MIR397a	+	8573	GATCCAATTCCAAGAATACA	0	0	0	0	1	0	0	0	0	2	0	0	0
ath-MIR397a	+	8042	GATCATTCCTCCTTGAACTG	0	2	0	0	0	0	0	0	0	0	0	0	0
ath-MIR397a	+	7613	GATCCTTCAGAAGCGGCTTT	0	0	1	0	0	0	0	0	0	0	0	0	3
ath-MIR397a	+	925	GATCAATTTTCTATTCTCAA	0	0	4	0	0	0	0	0	0	0	0	0	0
ath-MIR857	-	804	GATCAAGATTTTTTTTG	3	0	0	0	0	0	0	0	0	0	0	0	0
ath-MIR857	-	7027	GATCTGTGGTTCAGTCG	30	6	5	10	9	2	37	0	10	47	1	0	0
ath-MIR857	-	9450	GATCCAATTTGTATTCC	0	1	0	5	1	0	0	0	0	0	0	0	0
ath-MIR857	-	6884	GATCCGAAAGGCGTTGA	0	0	0	0	0	0	0	4	0	0	0	0	0
ath-MIR857	-	6884	GATCCGAAAGGCGTTGAAAG	0	0	0	0	0	0	0	5	0	0	0	0	0
ath-MIR857	-	9450	GATCCAATTTGTATTCCACC	0	1	0	6	2	0	0	0	0	0	0	0	0
ath-MIR857	-	7027	GATCTGTGGTTCAGTCGTGT	34	6	6	9	10	2	41	0	9	55	0	0	0
ath-MIR397b	-	1271	GATCAAGATTTTTTTTG	3	0	0	0	0	0	0	0	0	0	0	0	0
ath-MIR397b	-	7494	GATCTGTGGTTCAGTCG	30	6	5	10	9	2	37	0	10	47	1	0	0
ath-MIR397b	-	9917	GATCCAATTTGTATTCC	0	1	0	5	1	0	0	0	0	0	0	0	0
ath-MIR397b	-	7351	GATCCGAAAGGCGTTGA	0	0	0	0	0	0	0	4	0	0	0	0	0
ath-MIR397b	-	7351	GATCCGAAAGGCGTTGAAAG	0	0	0	0	0	0	0	5	0	0	0	0	0
ath-MIR397b	-	9917	GATCCAATTTGTATTCCACC	0	1	0	6	2	0	0	0	0	0	0	0	0
ath-MIR397b	-	7494	GATCTGTGGTTCAGTCGTGT	34	6	6	9	10	2	41	0	9	55	0	0	0
ath-MIR841	-	7870	GATCAAGATTTTTTTTG	3	0	0	0	0	0	0	0	0	0	0	0	0
ath-MIR841	-	5606	GATCATGTAATCCGAAA	137	123	22	0	0	229	0	0	12	7	0	0	0
ath-MIR841	-	4600	GATCCGTAAAAACAATG	0	0	0	0	0	0	0	0	0	9	0	0	0
ath-MIR841	-	5249	GATCTCATTCCGCTAAC	3	11	2	0	0	0	0	0	0	2	0	0	0
ath-MIR841	-	147	GATCCATTTATCAAAGT	0	0	0	0	0	0	0	0	0	1	0	0	0
ath-MIR841	-	3266	GATCTTATGACGACGAA	0	0	0	0	0	0	7	0	0	4	0	0	0
ath-MIR841	-	5606	GATCATGTAATCCGAAATCT	161	139	27	0	0	274	0	0	13	6	0	0	0
ath-MIR841	-	3266	GATCTTATGACGACGAAGAC	0	0	0	0	0	0	7	0	0	5	0	0	0
ath-MIR841	-	147	GATCCATTTATCAAAGTAAC	0	0	0	0	0	0	0	0	0	2	0	0	0
ath-MIR841	-	5249	GATCTCATTCCGCTAACAAA	3	12	3	0	0	0	0	0	0	3	0	0	0
ath-MIR841	-	4600	GATCCGTAAAAACAATGGTT	0	0	0	0	0	0	0	0	0	10	0	0	0
ath-MIR407	+	5564	GATCCTACTTCTTTACT	0	0	3	0	0	0	0	0	1	0	0	0	0
ath-MIR407	+	8549	GATCGTCTACAAAGCTT	0	0	0	0	0	0	0	0	0	1	0	0	0
ath-MIR407	+	9330	GATCTCAAACTCTTTTC	42	15	2	20	84	3	0	1	3	45	7	55	0
ath-MIR407	+	9113	GATCACCTTAGTAGTAG	2	2	0	0	0	0	0	0	0	1	0	0	0
ath-MIR407	+	751	GATCTTGGGCTGAAGCT	0	0	4	0	0	0	0	0	0	0	0	0	0
ath-MIR407	+	8955	GATCTTATTACCATCAT	4	0	0	0	2	0	0	0	0	5	0	0	0
ath-MIR407	+	5296	GATCTCTGCCTTGGCTC	41	43	51	31	92	26	9	105	72	61	121	101	21
ath-MIR407	+	3095	GATCACTTACTATCCCA	0	2	0	0	0	0	0	0	0	0	0	0	3
ath-MIR407	+	364	GATCGATTTACTCTTAA	0	0	0	0	0	1	0	0	0	0	0	0	0
ath-MIR407	+	5591	GATCTCTAGTGTTTAGA	84	10	1	6	0	0	0	0	4	51	19	76	0
ath-MIR407	+	5080	GATCTCTTGGTCATCGG	0	0	0	0	0	0	0	0	0	0	0	0	7
ath-MIR407	+	1859	GATCCTTCTACAGTTTA	0	0	0	1	0	0	0	0	0	0	0	0	0
ath-MIR407	+	2541	GATCTATAGGGTCCCCC	0	0	0	0	0	0	0	0	2	0	0	0	0
ath-MIR407	+	364	GATCGATTTACTCTTAACTT	0	0	0	0	0	1	0	0	0	0	0	0	0
ath-MIR407	+	5080	GATCTCTTGGTCATCGGTGG	0	0	0	0	0	0	0	0	0	0	0	0	11
ath-MIR407	+	8549	GATCGTCTACAAAGCTTAAC	0	0	0	0	0	0	0	0	0	2	0	0	0
ath-MIR407	+	9330	GATCTCAAACTCTTTTCAAT	46	15	2	22	94	3	0	2	0	50	5	62	0
ath-MIR407	+	8955	GATCTTATTACCATCATCCG	5	0	0	0	2	0	0	0	0	5	0	0	0
ath-MIR407	+	751	GATCTTGGGCTGAAGCTATG	0	0	5	0	0	0	0	0	0	0	0	0	0
ath-MIR407	+	5591	GATCTCTAGTGTTTAGAGTG	26	12	1	3	0	0	0	0	5	51	23	41	0
ath-MIR407	+	5296	GATCTCTGCCTTGGCTCAGT	44	47	57	34	100	27	10	118	80	68	136	116	26
ath-MIR407	+	5564	GATCCTACTTCTTTACTTCG	0	0	3	0	0	0	0	0	1	0	0	0	0
ath-MIR407	+	1859	GATCCTTCTACAGTTTATGG	0	0	0	2	0	0	0	0	0	0	0	0	0
ath-MIR407	+	3095	GATCACTTACTATCCCAGCA	0	2	0	0	0	0	0	0	0	0	0	0	4
ath-MIR407	+	2541	GATCTATAGGGTCCCCCATG	0	0	0	0	0	0	0	0	2	0	0	0	0
ath-MIR394a	+	650	GATCATAGTTATTTGGG	0	0	0	0	0	0	0	0	0	1	0	0	0
ath-MIR394a	+	1134	GATCAAGGAATAGGTGA	0	1	0	0	0	0	0	0	5	0	0	0	0
ath-MIR394a	+	3841	GATCCTGACGCTGAAGA	0	0	0	0	0	0	0	0	0	0	8	0	0
ath-MIR394a	+	5641	GATCACACCCATGTTTG	0	1	0	1	0	0	0	0	0	0	0	0	1
ath-MIR394a	+	8899	GATCGCAATCCCAGTGC	0	0	0	0	0	0	0	0	1	0	0	0	0
ath-MIR394a	+	3841	GATCCTGACGCTGAAGAAGT	0	0	0	0	0	0	0	0	0	0	8	0	0
ath-MIR394a	+	650	GATCATAGTTATTTGGGTAT	0	0	0	0	0	0	0	0	0	2	0	0	0
ath-MIR394a	+	1134	GATCAAGGAATAGGTGAAGA	0	0	0	0	0	0	0	0	3	0	0	0	0
ath-MIR394a	+	8899	GATCGCAATCCCAGTGCGGG	0	0	0	0	0	0	0	0	1	0	0	0	0
ath-MIR394a	+	5641	GATCACACCCATGTTTGCTC	0	1	0	1	0	0	0	0	0	0	0	0	1
ath-MIR833	+	4982	GATCATTCGTTCACCAT	0	0	0	3	0	0	0	0	0	0	0	0	0
ath-MIR833	+	4849	GATCTAAAACGTTCATG	0	0	2	0	0	0	0	0	0	0	0	0	0
ath-MIR833	+	3065	GATCAGCCACTGGCTTT	0	0	0	0	0	0	0	0	6	0	0	0	0
ath-MIR833	+	5230	GATCACATGCATGGGTT	33	4	19	19	2	9	19	5	61	10	0	0	0
ath-MIR833	+	5158	GATCTCTATAATTTTTA	33	0	0	0	0	0	0	0	0	20	0	0	0
ath-MIR833	+	401	GATCTTCTCTGGTCAAG	2	0	0	0	0	0	0	0	0	0	0	0	0
ath-MIR833	+	3369	GATCCACCAGATTTTCC	0	0	4	0	0	0	0	0	7	0	0	0	0
ath-MIR833	+	2721	GATCTCAAAAATCTGAC	3	0	0	0	0	0	0	0	0	0	0	0	0
ath-MIR833	+	4083	GATCGGCTATAAATCTC	0	0	0	0	0	0	0	0	3	0	0	0	0
ath-MIR833	+	2721	GATCTCAAAAATCTGACCCG	4	0	0	0	0	0	0	0	0	0	0	0	0
ath-MIR833	+	4982	GATCATTCGTTCACCATTCC	0	0	0	3	0	0	0	0	0	0	0	0	0
ath-MIR833	+	5158	GATCTCTATAATTTTTAAAA	33	0	0	0	0	0	0	0	0	23	0	0	0
ath-MIR833	+	3369	GATCCACCAGATTTTCCGGC	0	0	5	0	0	0	0	0	8	0	0	0	0
ath-MIR833	+	4849	GATCTAAAACGTTCATGGCG	0	0	2	0	0	0	0	0	0	0	0	0	0
ath-MIR833	+	4083	GATCGGCTATAAATCTCATC	0	0	0	0	0	0	0	0	3	0	0	0	0
ath-MIR833	+	5230	GATCACATGCATGGGTTCCT	38	4	12	22	2	0	21	5	68	11	0	0	0
ath-MIR833	+	401	GATCTTCTCTGGTCAAGCTT	2	0	0	0	0	0	0	0	0	0	0	0	0
ath-MIR833	+	3065	GATCAGCCACTGGCTTTACC	0	0	0	0	0	0	0	0	7	0	0	0	0
ath-MIR838	+	3876	GATCTTCTTGACAAGGA	0	1	2	0	0	0	0	0	0	0	0	0	0
ath-MIR838	+	2450	GATCTGTTGTTATTCGA	22	19	12	19	17	4	0	0	12	13	22	11	0
ath-MIR838	+	985	GATCCTGATGAAGTCGA	0	0	2	0	0	0	0	0	0	0	0	0	0
ath-MIR838	+	3065	GATCATCAACACACACT	0	2	0	0	0	0	0	0	0	0	0	0	0
ath-MIR838	+	7948	GATCTGAACAGCAGTCT	0	2	0	0	0	0	0	0	0	0	0	0	0
ath-MIR838	+	4328	GATCGAAACGAAACAGC	0	0	3	0	0	1	0	0	0	3	0	1	0
ath-MIR838	+	6069	GATCTTGCAGAGCTGTG	0	4	1	0	0	0	0	0	0	0	0	0	0
ath-MIR838	+	8429	GATCTCCCCAAACATGA	0	6	0	0	0	0	0	0	0	0	0	0	0
ath-MIR838	+	1255	GATCTTCGAGCTGCAGC	0	2	2	6	0	0	0	0	0	1	0	0	0
ath-MIR838	+	2001	GATCAAGGCGAGAATGA	3	3	12	4	5	0	0	0	0	3	2	0	0
ath-MIR838	+	3087	GATCTTGTCATCTTTTT	0	0	0	0	0	0	0	0	0	0	0	6	1
ath-MIR838	+	1255	GATCTTCGAGCTGCAGCGGT	0	3	2	8	0	0	0	0	0	0	0	0	0
ath-MIR838	+	2001	GATCAAGGCGAGAATGAGAA	2	3	14	4	5	0	0	0	0	3	2	0	0
ath-MIR838	+	4328	GATCGAAACGAAACAGCCGA	0	0	3	0	0	1	0	0	0	3	0	1	0
ath-MIR838	+	3065	GATCATCAACACACACTGCA	0	2	0	0	0	0	0	0	0	0	0	0	0
ath-MIR838	+	2450	GATCTGTTGTTATTCGAGTT	11	26	10	15	19	1	0	0	9	18	20	6	0
ath-MIR838	+	7948	GATCTGAACAGCAGTCTTTG	0	2	0	0	0	0	0	0	0	0	0	0	0
ath-MIR838	+	8429	GATCTCCCCAAACATGAAAG	0	3	0	0	0	0	0	0	0	0	0	0	0
ath-MIR838	+	6069	GATCTTGCAGAGCTGTGTTT	0	4	1	0	0	0	0	0	0	0	0	0	0
ath-MIR838	+	3876	GATCTTCTTGACAAGGATGA	0	1	2	0	0	0	0	0	0	0	0	0	0
ath-MIR838	+	3087	GATCTTGTCATCTTTTTCAC	0	0	0	0	2	0	0	0	0	0	0	2	5
ath-MIR838	+	985	GATCCTGATGAAGTCGATGG	0	0	3	0	0	0	0	0	0	0	0	0	0
ath-MIR850	+	1485	GATCACCTTTCAATCAT	0	0	0	0	0	0	18	3	5	9	0	0	0
ath-MIR850	+	345	GATCATGGAGGAGGCAC	0	0	0	0	0	0	0	0	7	0	0	0	0
ath-MIR850	+	1851	GATCACCGTTTGTTCAT	0	0	0	0	0	0	0	0	0	1	0	3	0
ath-MIR850	+	1144	GATCAGGTGTATTCAAT	0	0	0	0	0	0	0	0	12	8	0	0	0
ath-MIR850	+	729	GATCTCAATAGCATTGA	53	0	0	4	0	0	44	18	45	594	0	4	0
ath-MIR850	+	377	GATCCACGAGAGAACCA	0	0	2	0	0	2	2	0	0	0	0	0	0
ath-MIR850	+	377	GATCCACGAGAGAACCAACC	0	0	3	0	0	1	1	0	0	0	0	0	0
ath-MIR850	+	1144	GATCAGGTGTATTCAATCTT	0	0	0	0	0	0	0	0	13	8	0	0	0
ath-MIR850	+	1851	GATCACCGTTTGTTCATAAG	0	0	0	0	0	0	0	0	0	1	0	4	0
ath-MIR850	+	1485	GATCACCTTTCAATCATCTA	0	0	0	0	0	0	13	4	5	3	0	0	0
ath-MIR850	+	345	GATCATGGAGGAGGCACCAA	0	0	0	0	0	0	0	0	5	0	0	0	0
ath-MIR850	+	729	GATCTCAATAGCATTGATAC	56	0	0	4	0	0	45	21	45	660	0	5	0
ath-MIR863	+	513	GATCACCTTTCAATCAT	0	0	0	0	0	0	18	3	5	9	0	0	0
ath-MIR863	+	879	GATCACCGTTTGTTCAT	0	0	0	0	0	0	0	0	0	1	0	3	0
ath-MIR863	+	172	GATCAGGTGTATTCAAT	0	0	0	0	0	0	0	0	12	8	0	0	0
ath-MIR863	+	172	GATCAGGTGTATTCAATCTT	0	0	0	0	0	0	0	0	13	8	0	0	0
ath-MIR863	+	879	GATCACCGTTTGTTCATAAG	0	0	0	0	0	0	0	0	0	1	0	4	0
ath-MIR863	+	513	GATCACCTTTCAATCATCTA	0	0	0	0	0	0	13	4	5	3	0	0	0
ath-MIR854b	-	1006	GATCCAAGTAGCTGACT	2	0	0	0	0	9	0	0	0	0	0	0	0
ath-MIR854b	-	2645	GATCACGAAGCCCATCT	3	0	0	0	0	0	0	0	0	0	0	0	0
ath-MIR854b	-	1006	GATCCAAGTAGCTGACTCTC	2	0	0	0	0	11	0	0	0	0	0	0	0
ath-MIR776	+	4954	GATCCACCAGTAACCAT	0	0	0	1	0	0	0	0	1	0	0	0	0
ath-MIR776	+	4827	GATCACACCAATACTAA	0	0	0	0	0	0	0	0	0	3	2	0	0
ath-MIR776	+	2753	GATCGAAGCCCTTCCAT	0	1	8	3	0	0	0	24	13	2	35	0	23
ath-MIR776	+	389	GATCGTCTTTTTCCTCT	2	0	0	4	0	0	0	0	0	0	0	0	0
ath-MIR776	+	1285	GATCTTGTATCCTTGTT	0	1	0	0	0	0	0	0	0	0	0	0	0
ath-MIR776	+	5189	GATCGACGGGAGAAAGA	0	0	0	3	5	0	0	0	0	0	6	1	0
ath-MIR776	+	3404	GATCGATATGATTCCCT	0	0	0	2	0	16	0	0	14	0	0	1	5
ath-MIR776	+	252	GATCATTCTTGTAATCT	0	0	0	5	0	0	0	0	0	0	0	0	0
ath-MIR776	+	5106	GATCGTTGATGTTGTTA	303	250	90	209	297	291	12	36	55	88	232	315	50
ath-MIR776	+	3141	GATCTTGCTCCATCATT	0	0	0	0	0	0	0	0	0	0	2	0	0
ath-MIR776	+	3624	GATCCTAGGAAGAAAAA	0	0	0	3	0	0	0	0	0	0	0	0	0
ath-MIR776	+	3159	GATCTCAAATCTTCTAC	0	1	0	0	0	0	0	0	0	0	5	3	1
ath-MIR776	+	3329	GATCCAGAGAGTGAAGA	0	0	3	2	0	0	0	0	2	0	0	0	3
ath-MIR776	+	3624	GATCCTAGGAAGAAAAAGAC	0	0	0	3	0	0	0	0	0	0	0	0	0
ath-MIR776	+	4954	GATCCACCAGTAACCATAAA	0	0	0	1	0	0	0	0	1	0	0	0	0
ath-MIR776	+	389	GATCGTCTTTTTCCTCTGTT	3	0	0	0	0	0	0	0	0	0	0	0	0
ath-MIR776	+	2753	GATCGAAGCCCTTCCATACT	0	1	9	3	0	0	0	26	15	2	39	0	29
ath-MIR776	+	252	GATCATTCTTGTAATCTTTT	0	0	0	6	0	0	0	0	0	0	0	0	0
ath-MIR776	+	5189	GATCGACGGGAGAAAGAATT	0	0	0	3	0	0	0	0	0	0	2	0	0
ath-MIR776	+	4827	GATCACACCAATACTAACTC	0	0	0	0	0	0	0	0	0	3	2	0	0
ath-MIR776	+	3329	GATCCAGAGAGTGAAGAAGA	0	0	4	2	0	0	0	0	2	0	0	0	5
ath-MIR776	+	3159	GATCTCAAATCTTCTACATC	0	0	0	0	0	0	0	0	0	0	0	5	5
ath-MIR776	+	5106	GATCGTTGATGTTGTTAGTT	0	0	0	0	0	0	0	0	3	0	0	0	0
ath-MIR158b	+	227	GATCTTGCTCTAAACTT	0	0	0	0	0	4	0	0	0	0	0	0	0
ath-MIR158b	+	3835	GATCTCTTGGCAAGCTT	0	0	0	0	0	0	0	0	0	0	0	5	0
ath-MIR158b	+	9929	GATCAAGAACACGAAGA	0	0	0	1	0	0	0	0	0	0	0	0	0
ath-MIR158b	+	227	GATCTTGCTCTAAACTTGAG	0	0	0	0	0	2	0	0	0	0	0	0	0
ath-MIR158b	+	9929	GATCAAGAACACGAAGATTT	0	0	0	2	0	0	0	0	0	0	0	0	0
ath-MIR4240	-	2954	GATCCACGAGTGCCATG	0	0	1	0	0	0	0	0	0	0	0	0	0
ath-MIR4240	-	2709	GATCCACGCAAATCTTT	0	0	0	0	0	0	0	0	0	0	11	7	0
ath-MIR4240	-	3371	GATCCCAAGTTCCAAGA	12	0	0	0	0	0	0	0	0	0	0	5	5
ath-MIR4240	-	3784	GATCCCGGAGGCGAAAC	0	0	0	2	0	0	0	0	0	0	2	0	21
ath-MIR4240	-	3015	GATCAAAGCTTTTGGGC	0	0	0	0	0	5	0	0	0	0	0	0	0
ath-MIR4240	-	7925	GATCATGAAACCATTGC	0	0	0	0	0	0	0	0	0	5	0	0	0
ath-MIR4240	-	7000	GATCTGAAGTTTGATGC	0	0	0	0	0	0	0	0	0	0	0	0	5
ath-MIR4240	-	3371	GATCCCAAGTTCCAAGACCT	13	0	0	0	0	0	0	0	0	0	0	0	0
ath-MIR4240	-	3784	GATCCCGGAGGCGAAACACT	0	0	0	2	0	0	0	0	0	0	2	0	24
ath-MIR4240	-	7000	GATCTGAAGTTTGATGCTAC	0	0	0	0	0	0	0	0	0	0	0	0	8
ath-MIR4240	-	3015	GATCAAAGCTTTTGGGCTAT	0	0	0	0	0	5	0	0	0	0	0	0	0
ath-MIR4240	-	2954	GATCCACGAGTGCCATGTAA	0	0	1	0	0	0	0	0	0	0	0	0	0
ath-MIR4240	-	2709	GATCCACGCAAATCTTTTGT	0	0	0	0	0	0	0	0	0	0	13	7	0
ath-MIR825	+	869	GATCTATTAACACTGAT	28	0	0	0	0	0	0	0	0	3	0	0	0
ath-MIR825	+	3723	GATCTCGTTACTGAAAA	0	0	0	0	0	0	0	0	3	0	0	0	0
ath-MIR825	+	7754	GATCCCATCATCCCTGT	0	0	0	0	0	0	0	1	0	0	5	2	0
ath-MIR825	+	4838	GATCTTCTTCTTCTTCT	0	8	0	0	0	16	8	0	0	12	0	5	2
ath-MIR825	+	5458	GATCGGCTCTCGGTGGA	0	0	1	0	1	0	0	1	0	0	0	0	2
ath-MIR825	+	2187	GATCTCTCGTTCTGATG	0	0	0	0	0	0	0	0	0	3	0	0	0
ath-MIR825	+	5202	GATCTCATCACTTTGTT	0	0	0	6	0	0	0	0	0	0	0	0	0
ath-MIR825	+	1508	GATCAATGTTCATCGTC	0	0	5	0	0	0	0	0	0	0	0	0	0
ath-MIR825	+	5458	GATCGGCTCTCGGTGGAGGA	0	0	2	0	0	0	0	0	0	0	0	0	1
ath-MIR825	+	4838	GATCTTCTTCTTCTTCTTCT	0	0	0	0	0	0	9	0	0	0	0	0	0
ath-MIR825	+	7754	GATCCCATCATCCCTGTCAG	0	0	0	0	0	0	0	1	0	0	6	0	0
ath-MIR825	+	5202	GATCTCATCACTTTGTTGAA	0	0	0	1	0	0	0	0	0	0	0	0	0
ath-MIR825	+	2187	GATCTCTCGTTCTGATGGCT	0	0	0	0	0	0	0	0	0	3	0	0	0
ath-MIR825	+	869	GATCTATTAACACTGATATT	29	0	0	0	0	0	0	0	0	3	0	0	0
ath-MIR156a	-	5204	GATCTTCAAGGCGGAAT	0	0	0	0	0	0	0	0	0	0	0	0	9
ath-MIR156a	-	5283	GATCCTGAACAAAGAAT	11	27	14	35	13	23	14	3	15	30	34	38	2
ath-MIR156a	-	5505	GATCTCTCTAACCTATT	0	1	1	0	0	0	0	0	0	0	0	0	0
ath-MIR156a	-	7029	GATCTCGGAGTTTGACC	0	0	0	0	0	0	1	2	2	0	0	0	27
ath-MIR156a	-	6873	GATCGGCGCTGTGCTTG	0	0	0	0	0	0	3	3	9	0	0	0	18
ath-MIR156a	-	5378	GATCCCATCTCCACCGG	0	0	0	0	0	0	0	0	0	0	0	10	0
ath-MIR156a	-	5378	GATCCCATCTCCACCGGAGC	0	0	0	0	0	0	0	0	0	0	0	12	0
ath-MIR156a	-	7029	GATCTCGGAGTTTGACCCGG	0	0	0	0	0	0	1	2	0	0	0	0	34
ath-MIR156a	-	5204	GATCTTCAAGGCGGAATGCG	0	0	0	0	0	0	0	0	0	0	0	0	11
ath-MIR156a	-	6873	GATCGGCGCTGTGCTTGGTC	0	0	0	0	0	0	3	3	9	0	0	0	23
ath-MIR773	+	9562	GATCCCATTGCTTGGCT	0	0	8	5	0	0	0	0	11	0	0	0	0
ath-MIR773	+	4147	GATCATGCACGGCCTTA	0	1	1	0	0	0	0	0	5	0	0	0	1
ath-MIR773	+	7329	GATCCAGCTTAAACCGG	42	16	33	24	36	13	9	2	9	29	42	24	2
ath-MIR773	+	4147	GATCATGCACGGCCTTAGCC	0	0	0	0	0	0	0	0	3	0	0	0	1
ath-MIR773	+	7329	GATCCAGCTTAAACCGGATT	47	19	38	29	44	17	9	2	9	31	49	27	4
ath-MIR773	+	9562	GATCCCATTGCTTGGCTAGC	0	0	9	6	0	0	0	0	12	0	0	0	0
ath-MIR166a	+	4907	GATCAGTTTACAATGGT	0	0	0	0	1	0	35	0	17	30	107	78	0
ath-MIR166a	+	694	GATCTTTCACTTGTGTA	13	0	0	0	0	0	0	0	0	0	7	10	0
ath-MIR166a	+	74	GATCTCTTACCTTACTT	0	0	0	0	0	0	0	0	0	0	14	0	0
ath-MIR166a	+	391	GATCTGTTTGTTTCTTA	0	0	2	0	0	0	0	0	0	0	0	0	0
ath-MIR166a	+	4727	GATCGCAAGGAGAAGAG	0	0	0	0	0	0	0	0	0	0	15	0	0
ath-MIR166a	+	557	GATCAATAGCTTGAATT	0	0	0	0	0	0	0	0	0	0	0	0	2
ath-MIR166a	+	5263	GATCACAAAGAAACGAA	0	0	0	0	0	0	0	0	0	0	0	18	0
ath-MIR166a	+	345	GATCTTCATGGTATTGA	5	0	0	0	0	0	0	0	23	0	0	1	5
ath-MIR166a	+	416	GATCTATATTTGTGACA	0	0	0	1	0	0	0	0	0	0	0	0	0
ath-MIR166a	+	5263	GATCACAAAGAAACGAAAAA	0	0	0	0	0	0	0	0	0	0	0	19	0
ath-MIR166a	+	416	GATCTATATTTGTGACACAA	0	0	0	1	0	0	0	0	0	0	0	0	0
ath-MIR166a	+	345	GATCTTCATGGTATTGAATG	6	0	0	0	0	0	0	0	23	0	0	1	7
ath-MIR166a	+	4907	GATCAGTTTACAATGGTAAC	0	0	0	0	0	0	36	0	19	34	107	89	0
ath-MIR166a	+	557	GATCAATAGCTTGAATTTGG	0	0	0	0	0	0	0	0	0	0	0	0	2
ath-MIR166a	+	694	GATCTTTCACTTGTGTAGTG	15	0	0	0	0	0	0	0	0	0	8	12	0
ath-MIR166a	+	74	GATCTCTTACCTTACTTTCT	0	0	0	0	0	0	0	0	0	0	17	0	0
ath-MIR166a	+	4727	GATCGCAAGGAGAAGAGCAA	0	0	0	0	0	0	0	0	0	0	17	0	0
ath-MIR166a	+	391	GATCTGTTTGTTTCTTAGCA	0	0	2	0	0	0	0	0	0	0	0	0	0
ath-MIR777	+	1678	GATCGTCAAAGCGGAGT	0	0	0	1	0	0	0	0	0	0	0	0	0
ath-MIR777	+	1030	GATCCACGAAAAAGGCC	0	0	0	0	0	0	0	0	0	0	0	1	0
ath-MIR777	+	3535	GATCCGAGTCACTTCCC	0	3	6	0	0	0	0	0	0	0	0	0	0
ath-MIR777	+	8038	GATCAATTACATACTTG	0	0	0	0	0	0	0	0	0	3	0	2	0
ath-MIR777	+	3589	GATCTACTGATTCAGCT	93	70	19	54	19	99	2	4	143	139	59	223	2
ath-MIR777	+	7832	GATCTTCTAAAACTTCT	0	0	0	0	0	0	0	0	1	0	0	0	0
ath-MIR777	+	2009	GATCGACTTAAATTGAA	0	0	0	0	0	6	0	0	0	0	0	0	0
ath-MIR777	+	1255	GATCATCTCCCACTGAA	0	0	0	0	0	3	0	0	0	0	0	0	0
ath-MIR777	+	7905	GATCTGTTTATTTTTAA	0	0	0	0	0	0	0	0	0	0	0	58	0
ath-MIR777	+	3535	GATCCGAGTCACTTCCCTAT	0	4	6	0	0	0	0	0	0	0	0	0	0
ath-MIR777	+	1255	GATCATCTCCCACTGAAGAA	0	0	0	0	0	4	0	0	0	0	0	0	0
ath-MIR777	+	7905	GATCTGTTTATTTTTAAAAC	0	0	0	0	0	0	0	0	0	0	0	57	0
ath-MIR777	+	8038	GATCAATTACATACTTGATT	0	0	0	0	0	0	0	0	0	0	0	2	0
ath-MIR777	+	1678	GATCGTCAAAGCGGAGTTAC	0	0	0	1	0	0	0	0	0	0	0	0	0
ath-MIR777	+	3589	GATCTACTGATTCAGCTTAA	99	79	21	31	8	117	2	5	156	148	53	208	3
ath-MIR777	+	7832	GATCTTCTAAAACTTCTAAG	0	0	0	0	0	0	0	0	1	0	0	0	0
ath-MIR777	+	1030	GATCCACGAAAAAGGCCAGG	0	0	0	0	0	0	0	0	0	0	0	1	0
ath-MIR834	-	1076	GATCTTGTAGACTCGAT	0	0	0	4	0	0	0	0	0	0	0	0	0
ath-MIR834	-	6425	GATCTCTTCCTGTGAAC	27	0	0	1	0	10	8	0	1	0	3	2	0
ath-MIR834	-	9422	GATCTTGCGCAAGCAGG	61	32	250	142	74	164	42	65	50	43	456	227	182
ath-MIR834	-	164	GATCTGCTCGCAGAAAA	0	0	0	1	0	0	0	0	0	0	0	0	0
ath-MIR834	-	7387	GATCTCCATCCCCATGA	0	0	0	0	0	0	0	0	0	0	0	1	0
ath-MIR834	-	8892	GATCTACATTCTCTGCT	0	0	0	4	0	0	0	0	0	1	0	0	0
ath-MIR834	-	6270	GATCCAGCTATTTACTA	3	3	0	0	3	0	0	0	3	0	5	4	0
ath-MIR834	-	6468	GATCGATAAACCTCTGC	0	0	4	0	0	2	0	0	10	1	7	8	0
ath-MIR834	-	9422	GATCTTGCGCAAGCAGGGGC	67	33	272	159	81	169	42	70	49	48	479	234	206
ath-MIR834	-	8892	GATCTACATTCTCTGCTTTT	0	0	0	4	0	0	0	0	0	1	0	0	0
ath-MIR834	-	6425	GATCTCTTCCTGTGAACACA	27	0	0	1	0	12	8	0	1	0	4	3	0
ath-MIR834	-	6270	GATCCAGCTATTTACTACTT	4	3	0	0	3	0	0	0	3	0	5	2	0
ath-MIR834	-	7387	GATCTCCATCCCCATGATAT	0	0	0	0	0	0	0	0	0	0	0	1	0
ath-MIR834	-	6468	GATCGATAAACCTCTGCATC	0	0	1	0	0	3	0	0	8	1	8	6	0
ath-MIR165a	-	8258	GATCTTTTGGTAACAGT	0	0	0	0	0	0	0	0	0	0	0	1	0
ath-MIR165a	-	874	GATCATCGTTATCCCCC	3	0	0	0	0	0	0	0	0	0	0	0	0
ath-MIR165a	-	5036	GATCCTTTTCACTTGCC	0	5	0	6	5	0	0	0	0	1	0	0	0
ath-MIR165a	-	3282	GATCCTCCTTCATGGTC	0	0	0	0	0	0	0	0	0	11	0	0	0
ath-MIR165a	-	2933	GATCCCCAACCTTTGAT	0	0	0	0	0	0	0	0	3	0	0	0	0
ath-MIR165a	-	130	GATCCGTCTATGCTTTT	0	0	0	0	0	0	0	0	4	0	2	3	0
ath-MIR165a	-	8702	GATCAAAATGGAGAGGG	0	0	0	0	0	22	0	0	0	0	0	0	0
ath-MIR165a	-	1187	GATCAATATGGCAGACG	0	0	0	0	0	0	0	0	0	0	0	2	0
ath-MIR165a	-	6427	GATCCAAACGCAGGAAA	0	0	0	6	0	26	0	0	0	0	0	0	0
ath-MIR165a	-	1058	GATCGATTAGGTCTCTC	5	0	0	0	0	0	0	0	0	0	0	2	0
ath-MIR165a	-	6264	GATCTGTTCGGTAGTGA	0	0	0	0	0	0	0	0	0	2	0	0	0
ath-MIR165a	-	5313	GATCCTGAAACTGGAGT	0	0	5	0	0	2	0	0	0	0	0	0	3
ath-MIR165a	-	130	GATCCGTCTATGCTTTTTGC	0	0	0	0	0	0	0	0	4	0	0	4	0
ath-MIR165a	-	874	GATCATCGTTATCCCCCCAA	2	0	0	0	0	0	0	0	0	0	0	0	0
ath-MIR165a	-	1058	GATCGATTAGGTCTCTCTGG	2	0	0	0	0	0	0	0	0	0	0	3	0
ath-MIR165a	-	2933	GATCCCCAACCTTTGATTCT	0	0	0	0	0	0	0	0	3	0	0	0	0
ath-MIR165a	-	5313	GATCCTGAAACTGGAGTGGG	0	0	4	0	0	2	0	0	0	0	0	0	5
ath-MIR165a	-	1187	GATCAATATGGCAGACGAAA	0	0	0	0	0	0	0	0	0	0	0	2	0
ath-MIR165a	-	6264	GATCTGTTCGGTAGTGATGT	0	0	0	0	0	0	0	0	0	3	0	0	0
ath-MIR165a	-	8702	GATCAAAATGGAGAGGGAAA	0	0	0	0	0	23	0	0	0	0	0	0	0
ath-MIR165a	-	6427	GATCCAAACGCAGGAAATGA	0	0	0	8	0	29	0	0	0	0	0	0	0
ath-MIR165a	-	5036	GATCCTTTTCACTTGCCATC	0	3	0	1	0	0	0	0	0	1	0	0	0
ath-MIR165a	-	3282	GATCCTCCTTCATGGTCAAG	0	0	0	0	0	0	0	0	0	12	0	0	0
[truncated: 946 more rows]
